# Supplementary material for: Rationally reconstructing the surface microstructure of a chemical bath deposited electron transport layer for efficient and stable perovskite solar cells
Source: Royal Society of Chemistry journal article supplement (doi:10.1039/d4qi01808g), 2024-01-01
Supplement: d4qi01808g1.pdf [file d4qi01808g1.pdf]

## Supporting information

### **Rationally reconstructing the surface microstructure of chemical bath deposited electron transport layer for efficient and stable perovskite solar cells**

Xinxuan Yang<sup>1,2,3,4</sup>, Lexin Wang<sup>3</sup>, Meihan Liu<sup>3</sup>, Jiahui Jin<sup>3</sup>, Lili Yang<sup>3,4</sup>, Lin Fan<sup>3,4</sup>, Maobin Wei<sup>3,4</sup>,  
Huilian Liu<sup>3,4</sup>, Haoran Chen<sup>1,2</sup>, Jinghai Yang<sup>3,4\*</sup>, Yulei Chang<sup>1,2\*</sup>, Fengyou Wang<sup>3,4\*</sup>

1. Key Laboratory of Luminescence Science and Technology, Chinese Academy of Sciences & State Key Laboratory of Luminescence Science and Applications, Changchun Institute of Optics, Fine Mechanics and Physics, Chinese Academy of Sciences, Changchun 130033 Jilin, China.
2. University of Chinese Academy of Sciences, Beijing 100049, China.
3. Key Laboratory of Functional Materials Physics and Chemistry of the Ministry of Education, Jilin Normal University, Changchun 130103, China
4. National Demonstration Center for Experimental Physics Education, Jilin Normal University, Siping 136000, China

Corresponding author:

Jinghai Yang, e-mail address: [jhyang1@jlnu.edu.cn](mailto:jhyang1@jlnu.edu.cn)

Yulei Chang, e-mail address: [yuleichang@ciomp.ac.cn](mailto:yuleichang@ciomp.ac.cn)

*Fengyou Wang*, e-mail address: [wfy@jlnu.edu.cn](mailto:wfy@jlnu.edu.cn)

## Experimental Section

### 1. Materials:

Fluorine-doped tin oxide glass (FTO) glass substrate, isopropanol (IPA), N, N-dimethylformamide (DMF), dimethyl sulfoxide (DMSO) and Acetonitrile (ACN) were purchased from Advanced electron technology CO., Ltd (China). Methylammonium chloride (MACl), Formamidinium iodide (FAI), Methylammonium bromide (MABr), Cesium (CsI), lead bromide (PbBr<sub>2</sub>), lead iodide (PbI<sub>2</sub>), 4-t-butylphenylammonium iodide (tBP), spiro-OMeTAD, lithium bis (trifluoromethanesulfonyl) imide (Li-TFSI) and FK209 Co(III)-TFSI salt were purchased from Xi'an Yuri Solar Co., Ltd (China). Chlorobenzene (CB), thioglycolic acid (TGA), Titanium tetrachloride (TiCl<sub>4</sub>) and Stannous chloride dihydrate (SnCl<sub>2</sub>·2H<sub>2</sub>O) were purchased from InnoChem (China). Tin (IV) oxide (15% in H<sub>2</sub>O colloidal dispersion) were purchased from Alfa Aesar. Absolute ethyl alcohol and urea were purchased from Sinopharm.

### 2. Synthesis of CBD-SnO<sub>2</sub> ETL

The CBD solution was prepared by dissolving 1 g urea and 220 mg SnCl<sub>2</sub>·2H<sub>2</sub>O in 80 ml DI water, followed by the addition of 20 µl thioglycolic acid and 1 ml HCl (37 wt%). The etched FTO substrates were ultrasonically washed for 20 min. Afterwards, all substrates were dried in an oven at 60° for 2 h. The deposition was made by putting the substrates vertically in a designed beaker filled with the above solution, in a 90 °C laboratory water bath for 4 h. The substrate needs to cool to RT before being cleaned with DI water and IPA for 5 minutes each to remove solvents effectively. The sample is annealed at 150°C for 1 h. Different concentrations of H<sub>2</sub>SO<sub>4</sub> solution were spin-coated on CBD-SnO<sub>2</sub> at 3000 rpm for half a minute. The samples were then annealed at 150°C for a quarter.

### 3. Synthesis of FAPbI<sub>3</sub> powder

Formamidinium lead triiodide (FAPbI<sub>3</sub>) black powder was synthesized by mixing 3.36 g FAI with 9 g PbI<sub>2</sub> (1:1 molar ratio) in 11 ml of 2-ME in a 70-ml vial by stirring. The mixed solution was heated to 120 °C in an oil bath and stirred for 45 min. Subsequently, the precipitated FAPbI<sub>3</sub> was filtered using filter paper without cooling to RT. The filtered FAPbI<sub>3</sub> was baked on a hot plate at 150 °C (in air) for 30 min and then left overnight in a vacuum chamber at RT.

#### 4. Device fabrication:

PSCs were composed of several layers of glass/FTO/CBD-SnO<sub>2</sub>/perovskite/Spiro-OMeTAD/Ag. The FTO substrate with CBD-SnO<sub>2</sub> was cleaned with UV-ozone for 15 minutes to remove impurities and improve wettability before use. The perovskite precursor solutions were prepared by dissolving 1.6 M FAPbI<sub>3</sub> powder with MDACl<sub>2</sub> (3.8 mol%) and MACl (35 mol%) in a mixed solvent of DMF: DMSO = 8:2. The perovskite solutions were then spin-coated onto the substrate at 1000 rpm for 10s and 5000 rpm for 15 s; 100 µl of CB ether was dripped onto the substrate during spinning. The substrates were cooled down to RT after annealing the perovskite. The hole-transporting material was deposited via spin coating at 4000 rpm for 30 s. The solution, composed of 72.3 mg spiro-OMeTAD, 30 µl TBP, 35 µl Li-TFSI (260 mg Li-TFSI dissolved in 1 ml ACN), and 10 µl FK209 (300 mg FK209 dissolved in 1 ml ACN) in 1 ml CB, was prepared as the hole-transporting solution. Finally, 100 nm of Ag top electrode was deposited through thermal evaporator under high vacuum with an active area of 0.09 cm<sup>2</sup>.

#### 5. Synthesis of CBD-TiO<sub>2</sub> ETL

Slowly drip 2 ml of TiCl<sub>4</sub> solution into 200 ml of DI water, and stir well. Then soak the cleaned FTO in the TiCl<sub>4</sub> solution and keep it at 70°C for 40 minutes.

#### 6. Property Characterization

The optical properties of the films were analyzed using a UV-Vis-near-infrared (NIR) spectrophotometer (Shimadzu, UV-3600Plus, Japan). Fourier transform infrared spectroscopy (FTIR) measurements were made using Nicolet iS10, America. X-ray photoelectron spectroscopy (XPS) was used to obtain the chemical states information (measured by Thermo Scientific Escalab250Xi, Germany). And we utilized this system to obtain Ultraviolet photoelectric emission spectroscopy (UPS) under ultra-high vacuum pressure. The crystal structure of perovskite samples were carried out by X-ray diffraction (XRD) (PANalytical X-ray Spectrometer Empyrean DY01660 ID206161). The scanning electron microscope (SEM) images was taken using a Hitachi S-4800. AFM was measured by Park NX20, Korea. PL spectra were obtained using a PL microscopic spectrometer (FLS1000, China) with a 405 nm CW laser excitation source. The TRPL (FLS1000, China) was measured by using an excitation wavelength of 405nm. The current density-voltage characteristics (J-V) of the devices were measured under a simulated AM 1.5G solar irradiation at 100 mW/cm<sup>2</sup> in air using a 94043A I-V Station (Newport Oriel, American). The external quantum efficiency (EQE) spectra of the devices were recorded in air without bias light by using a Newport Oriel IQE200, American. Electrical impedance spectroscopy (EIS) was performed by using the electrochemical workstation (CHI660C, Chen Hua, China) with a frequency range from 1 Hz to 0.1 MHz in the dark.

## Supplementary Notes S1

### The details for SCLC analyses

The electrical conductivity ( $\sigma$ ) of various ETLs calculated by the equation of

$$I = \sigma AL^{-1}V$$

where  $A$  is the area and  $L$  is the thickness of the film.

The  $J^{1/2}$ - $V$  curves are used to estimate the electron mobility according to the equation<sup>1-4</sup>

$$J = 9\varepsilon_0\varepsilon_r\mu V^2/8L^3$$

where  $\varepsilon_r$  is the relative permittivity,  $\varepsilon_0$  is the vacuum permittivity,  $\mu$  is the carrier mobility, and  $L$  is the thickness.

Here, the value of  $\varepsilon_r$  is 3.85 and the value of  $L$  is 30 nm.

## Supplementary Notes S2

DFT calculations were conducted through the Vienna ab initio Simulation Package (VASP) with the projector augmented wave method<sup>5,6</sup>. Generalized gradient approximation of the Perdew-Burke-Ernzerhof (PBE) functional was used as the exchange-correlation functional<sup>7</sup>. The Brillouin zone was sampled with  $2 \times 2 \times 1$  K points for surface calculation<sup>8</sup>. The cutoff energy was set as 500 eV, and structure relaxation was performed until the convergence criteria of energy and force reached  $1 \times 10^{-5}$  eV and  $0.02 \text{ eV \AA}^{-1}$ , respectively. A vacuum layer of 15 Å was constructed to eliminate interactions between periodic structures of surface models. The van der Waals (vdW) interaction was amended by the zero damping DFT-D3 method of Grimme<sup>9</sup>.

The adsorption energy ( $\Delta E_{\text{ads}}$ ) of adsorbate adsorption on surface is defined as

$$\Delta E_{\text{ads}} = E(*\text{adsorbate}) - E(*) - E(\text{adsorbate})$$

where  $E(*\text{adsorbate})$  and  $E(*)$  are the total energy of surface systems with and without adsorbate, respectively,  $E(\text{adsorbate})$  is the energy of an isolated adsorbate. According to this definition, negative adsorption energy suggests that the adsorption process is exothermic and the adsorption system is thermodynamically stable. Contrarily, a positive value corresponds to an endothermic and unstable adsorption.

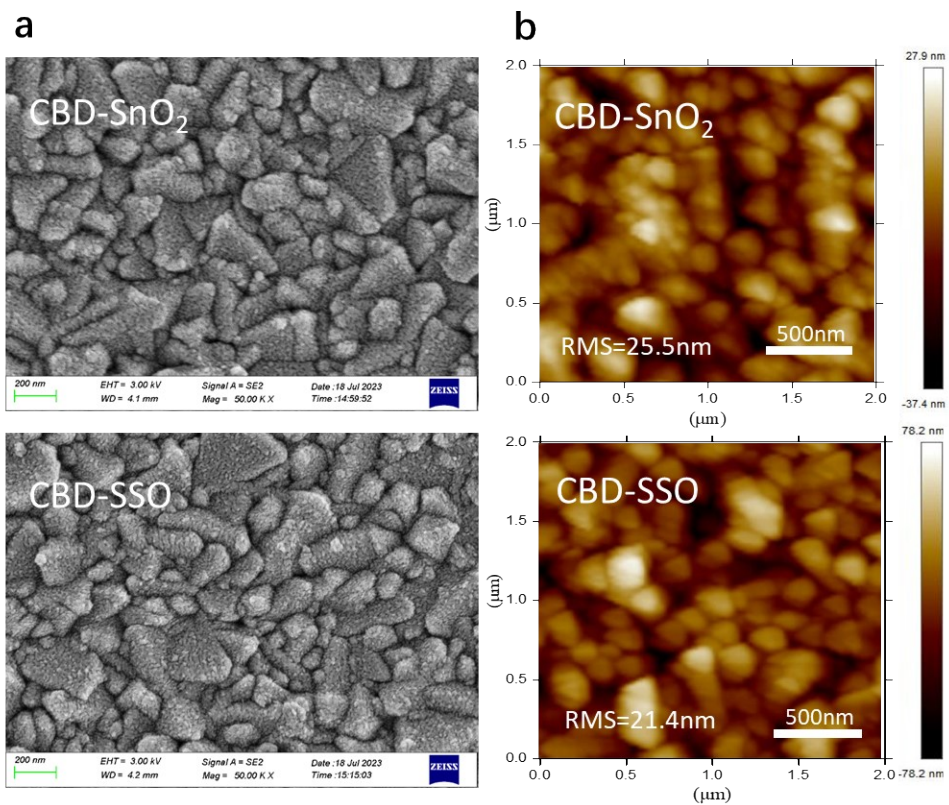

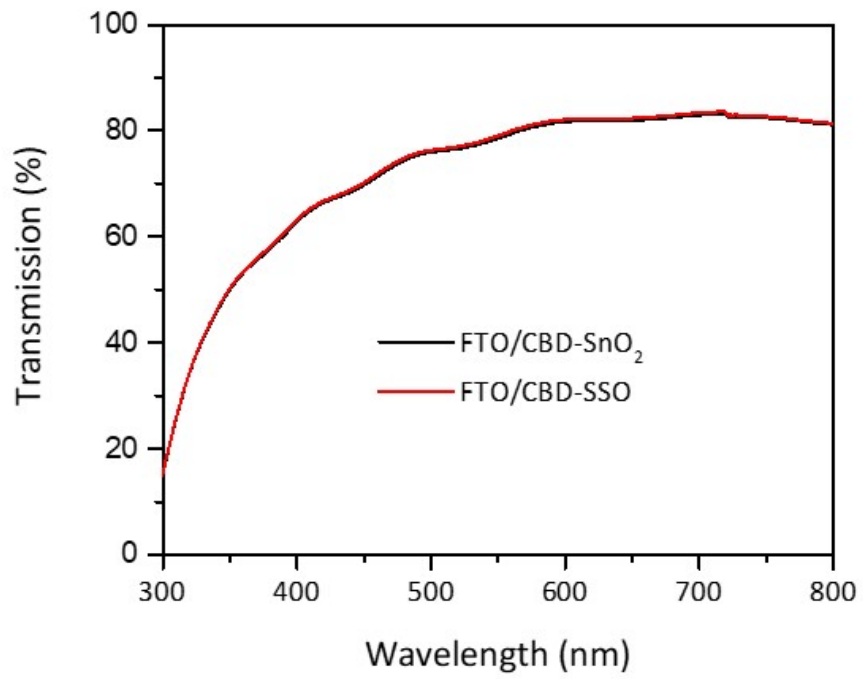

Figure S2. Optical transmission spectra of the CBD-SnO<sub>2</sub> and CBD-SSO films.



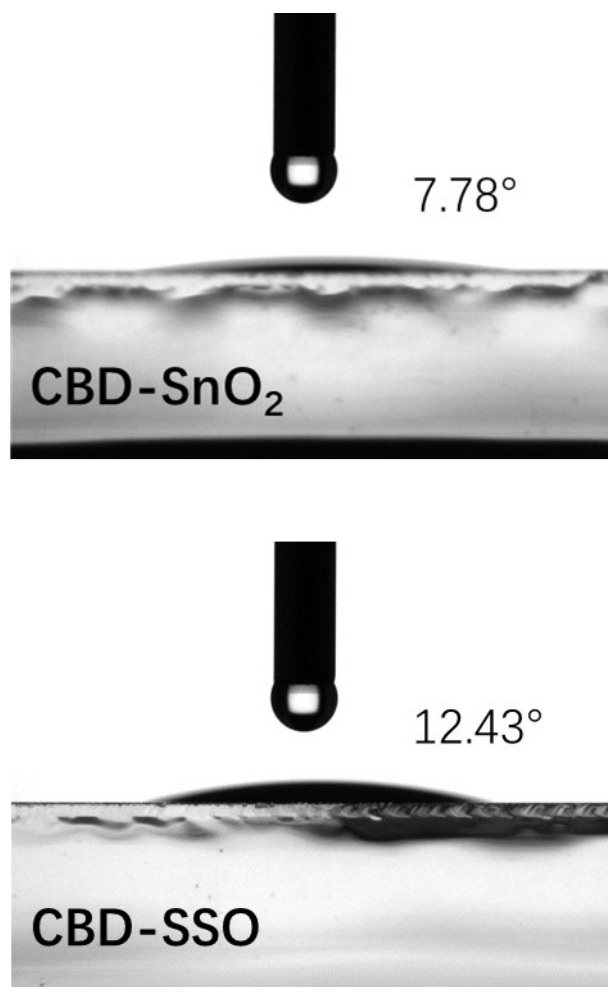

Figure S3. The surface of CBD-SnO<sub>2</sub> and CBD-SSO water contact Angle.

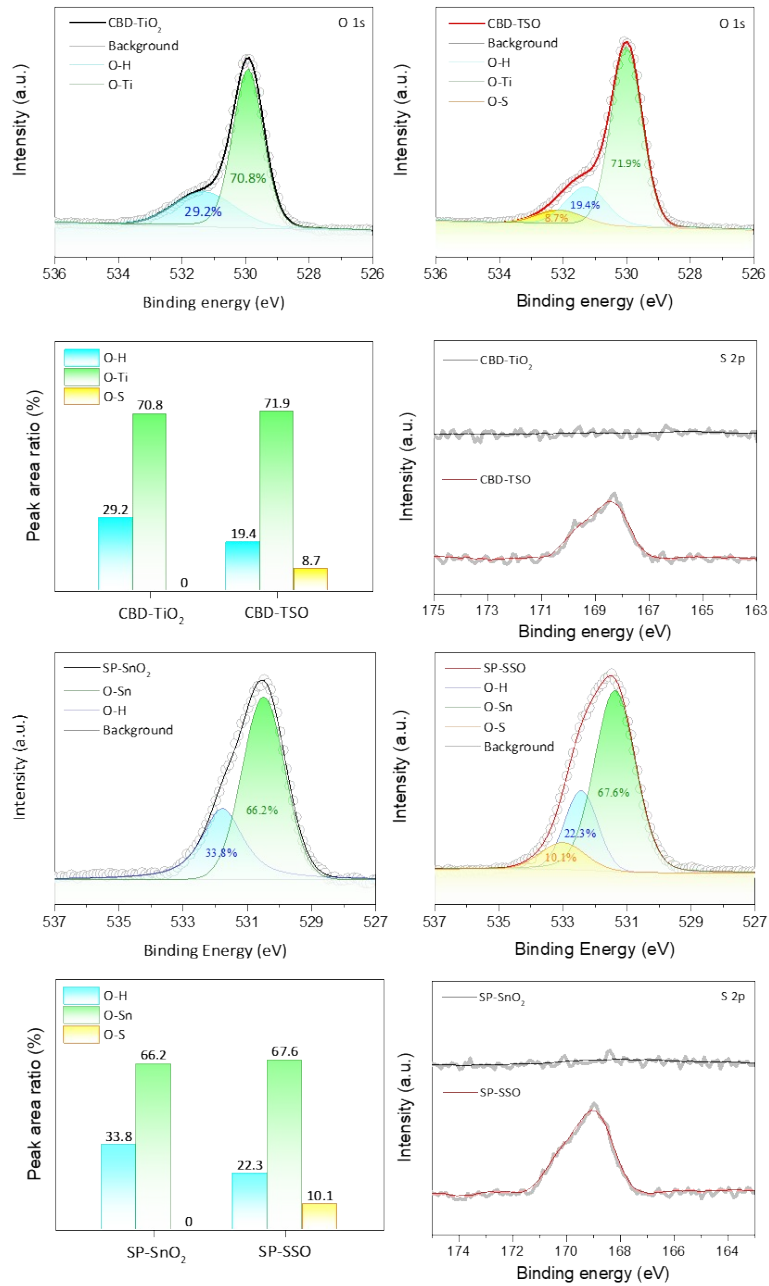

Figure S4. XPS O 1s, S 2p of titanium oxide prepared via CBD method (CBD-TiO<sub>2</sub>) and SnO<sub>2</sub> prepared through spin coating method (SP-SnO<sub>2</sub>) before and after H<sub>2</sub>SO<sub>4</sub> treatment (CBD-TSO and SP-SSO), respectively.

After H<sub>2</sub>SO<sub>4</sub> modification, the appearance of a S peak was observed, which proved the successful introduction of SO<sub>4</sub><sup>2-</sup>. At the same time, there was a varying degree of decrease in the peak area occupied by -OH, indicating that SO<sub>4</sub><sup>2-</sup> have a good removal effect on -OH on the surface of MO<sub>x</sub>.

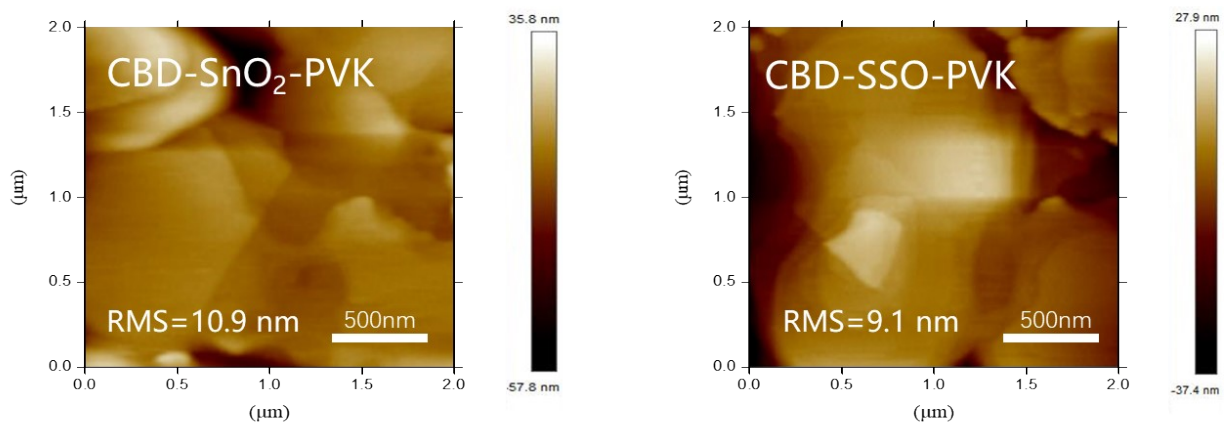

Figure S5. AFM images of the perovskite films deposited on CBD-SnO<sub>2</sub> and CBD-SSO.

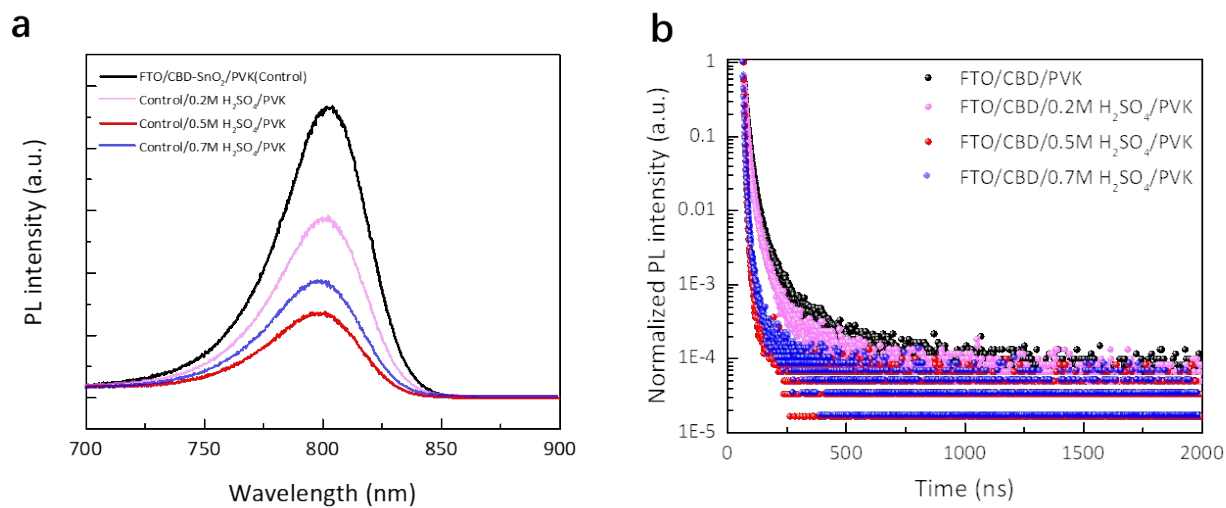

Figure S6. PL spectra and time-resolved PL (TRPL) of CBD-SnO<sub>2</sub>-PVK and CBD-SSO-PVK, respectively.

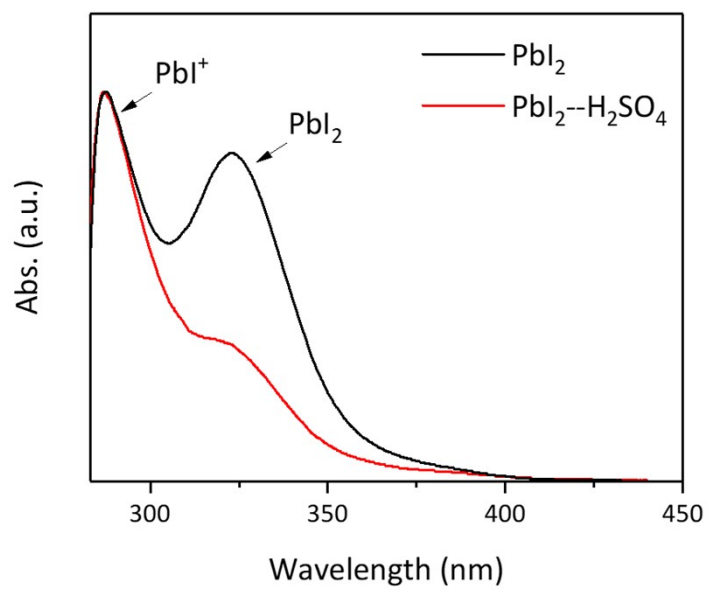

Figure S7 UV-vis absorption spectra of  $\text{PbI}_2$  and  $\text{PbI}_2\text{--H}_2\text{SO}_4$  mixture.

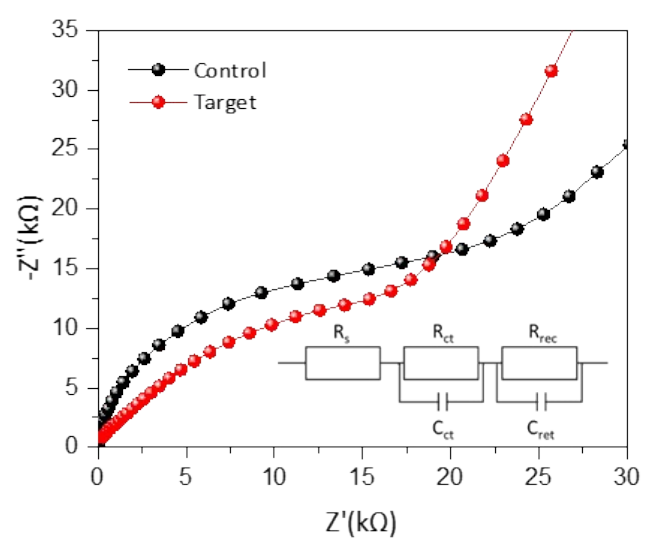

Figure S8 Nyquist plots for the control and target device.

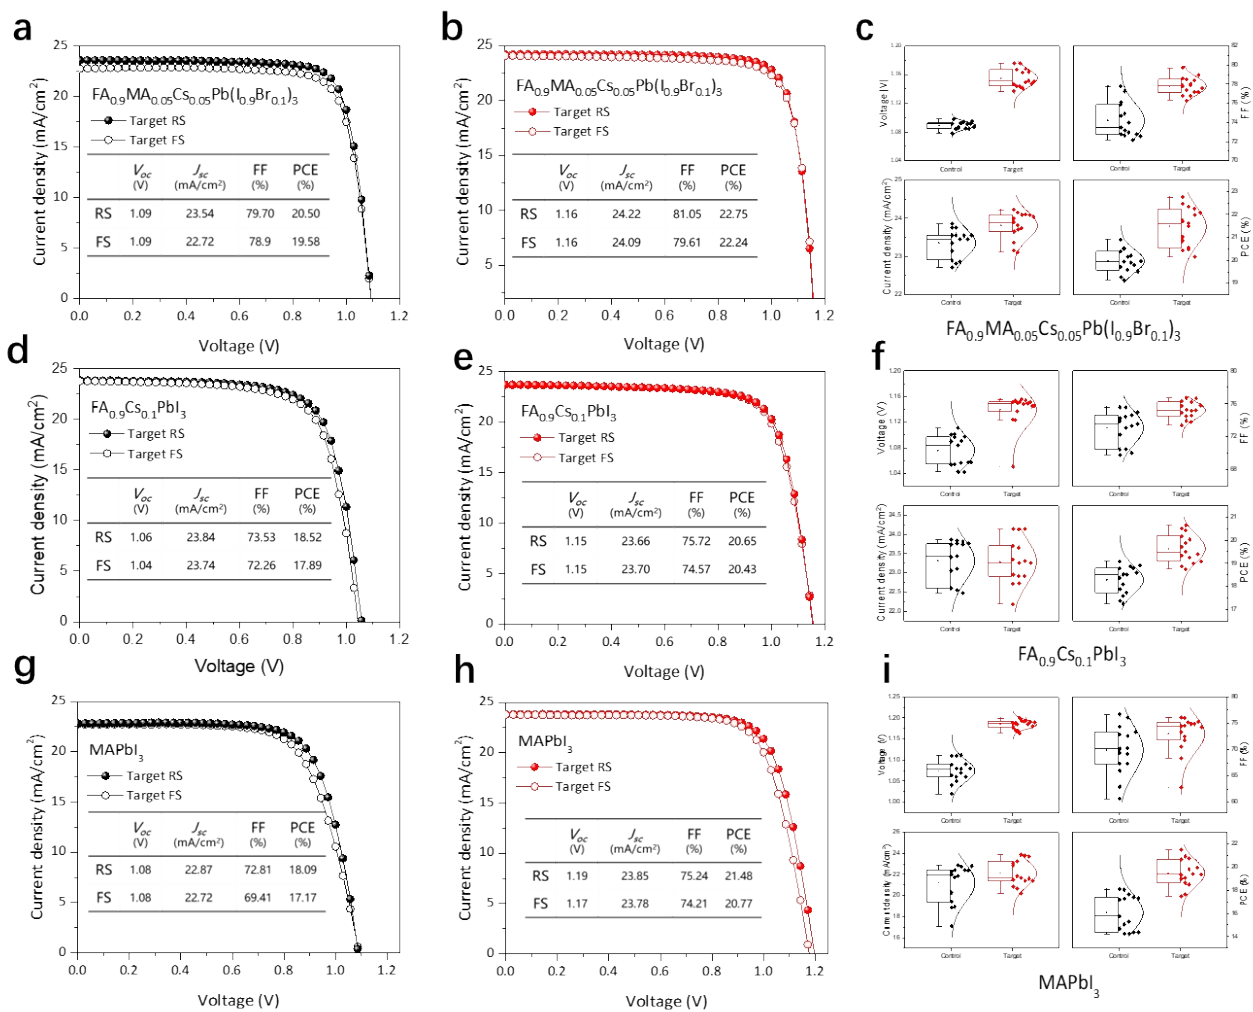

Figure S9 The champion devices of different composition perovskite prepared on CBD-SnO<sub>2</sub> (a, d, g) and CBD-SSO (b, e, h) substrates. The forward and reverse scan I-V curves were measured, with statistical graphs of 15 device parameters plotted (c, f, i).

Table S1 Fitting parameters of the bi-exponential decay function in TRPL of the corresponding CBD-SnO<sub>2</sub>-PVK and CBD-SSO-PVK substrate using a 460 nm excitation light source.

| <b>Sample</b>                       | <b><math>\tau_1</math> (ns)</b> | <b><math>A_1</math> (%)</b> | <b><math>\tau_2</math> (ns)</b> | <b><math>A_2</math> (%)</b> | <b><math>\tau_{\text{avg}}</math> (ns)</b> |
|-------------------------------------|---------------------------------|-----------------------------|---------------------------------|-----------------------------|--------------------------------------------|
| Control                             | 5.29                            | 72.73                       | 18.14                           | 27.27                       | 12.52                                      |
| 0.2M H <sub>2</sub> SO <sub>4</sub> | 4.57                            | 66.49                       | 18.26                           | 33.51                       | 13.72                                      |
| 0.5M H <sub>2</sub> SO <sub>4</sub> | 2.60                            | 82.51                       | 10.21                           | 17.49                       | 6.06                                       |
| 0.7M H <sub>2</sub> SO <sub>4</sub> | 3.60                            | 76.11                       | 13.55                           | 23.89                       | 8.99                                       |



## References

- 1 G. G. Malliaras, J. R. Salem, P. J. Brock and C. Scott, Electrical characteristics and efficiency of single-layer organic light-emitting diodes, *Phys. Rev. B*, 1998, **58**, R13411–R13414.
- 2 Y. Duan, X. Xu, H. Yan, W. Wu, Z. Li and Q. Peng, Pronounced Effects of a Triazine Core on Photovoltaic Performance – Efficient Organic Solar Cells Enabled by a PDI Trimer - Based Small Molecular Acceptor, *Adv. Mater.*, 2017, **29**, 1605115.
- 3 L. Yang, J. Feng, Z. Liu, Y. Duan, S. Zhan, S. Yang, K. He, Y. Li, Y. Zhou, N. Yuan and J. Ding, Record - Efficiency Flexible Perovskite Solar Cells Enabled by Multifunctional Organic Ions Interface Passivation, *Adv. Mater.*, 2022, **34**, 2201681.
- 4 D. Meng, H. Fu, C. Xiao, X. Meng, T. Winands, W. Ma, W. Wei, B. Fan, L. Huo, N. L. Doltsinis, Y. Li, Y. Sun and Z. Wang, Three-Bladed Rylene Propellers with Three-Dimensional Network Assembly for Organic Electronics *J. Am. Chem. Soc.*, 2016, **138**, 10184–10190.
- 5 G. Kresse, D. Joubert, From ultrasoft pseudopotentials to the projector augmented-wave method, *Phys. Rev. B*, 1999, **59**, 1758-1775.
- 6 P.E. Blöchl, Projector augmented-wave method, *Phys. Rev. B*, 1994, **50**, 17953-17979.
- 7 J.P. Perdew, K. Burke, M. Ernzerhof, Generalized Gradient Approximation Made Simple, *Phys. Rev. Lett.*, 1996, **77**, 3865-3868.
- 8 V. Wang, N. Xu, J.-C. Liu, G. Tang, W.-T. Geng, VASPKIT: A user-friendly interface facilitating high-throughput computing and analysis using VASP code, *Comput Phys Commun*, 2021, **267**, 108033.
- 9 S. Grimme, S. Ehrlich, L. Goerigk, Effect of the damping function in dispersion corrected density functional theory, *J. Comput. Chem.*, 2011, **32**, 1456-1465.

### The absorption of the CBD-SnO<sub>2</sub> and CBD-SSO

|       |       |       |
|-------|-------|-------|
| 200   | 0.031 | 0.084 |
| 200.5 | 0.031 | 0.084 |
| 201   | 0.031 | 0.084 |
| 201.5 | 0.032 | 0.085 |
| 202   | 0.032 | 0.085 |
| 202.5 | 0.032 | 0.085 |
| 203   | 0.032 | 0.085 |
| 203.5 | 0.032 | 0.085 |
| 204   | 0.031 | 0.086 |
| 204.5 | 0.031 | 0.086 |
| 205   | 0.031 | 0.086 |
| 205.5 | 0.031 | 0.087 |
| 206   | 0.031 | 0.087 |
| 206.5 | 0.032 | 0.088 |
| 207   | 0.032 | 0.088 |
| 207.5 | 0.032 | 0.088 |
| 208   | 0.032 | 0.088 |
| 208.5 | 0.032 | 0.088 |
| 209   | 0.031 | 0.088 |
| 209.5 | 0.031 | 0.088 |
| 210   | 0.032 | 0.088 |
| 210.5 | 0.031 | 0.088 |
| 211   | 0.031 | 0.088 |
| 211.5 | 0.031 | 0.088 |
| 212   | 0.031 | 0.089 |
| 212.5 | 0.031 | 0.089 |
| 213   | 0.031 | 0.089 |
| 213.5 | 0.032 | 0.089 |
| 214   | 0.032 | 0.089 |
| 214.5 | 0.032 | 0.089 |
| 215   | 0.032 | 0.089 |
| 215.5 | 0.032 | 0.089 |
| 216   | 0.032 | 0.089 |
| 216.5 | 0.031 | 0.089 |
| 217   | 0.031 | 0.089 |
| 217.5 | 0.031 | 0.089 |
| 218   | 0.031 | 0.089 |
| 218.5 | 0.031 | 0.089 |
| 219   | 0.03  | 0.089 |
| 219.5 | 0.03  | 0.089 |
| 220   | 0.031 | 0.089 |
| 220.5 | 0.03  | 0.089 |

|       |       |       |
|-------|-------|-------|
| 221   | 0.031 | 0.089 |
| 221.5 | 0.031 | 0.089 |
| 222   | 0.031 | 0.09  |
| 222.5 | 0.031 | 0.089 |
| 223   | 0.031 | 0.089 |
| 223.5 | 0.03  | 0.09  |
| 224   | 0.03  | 0.09  |
| 224.5 | 0.031 | 0.09  |
| 225   | 0.031 | 0.089 |
| 225.5 | 0.031 | 0.09  |
| 226   | 0.031 | 0.089 |
| 226.5 | 0.031 | 0.089 |
| 227   | 0.031 | 0.089 |
| 227.5 | 0.031 | 0.088 |
| 228   | 0.031 | 0.088 |
| 228.5 | 0.031 | 0.088 |
| 229   | 0.031 | 0.088 |
| 229.5 | 0.031 | 0.088 |
| 230   | 0.031 | 0.088 |
| 230.5 | 0.031 | 0.088 |
| 231   | 0.031 | 0.088 |
| 231.5 | 0.031 | 0.087 |
| 232   | 0.031 | 0.087 |
| 232.5 | 0.031 | 0.087 |
| 233   | 0.031 | 0.087 |
| 233.5 | 0.03  | 0.087 |
| 234   | 0.03  | 0.087 |
| 234.5 | 0.03  | 0.087 |
| 235   | 0.03  | 0.087 |
| 235.5 | 0.031 | 0.087 |
| 236   | 0.031 | 0.087 |
| 236.5 | 0.031 | 0.087 |
| 237   | 0.031 | 0.087 |
| 237.5 | 0.031 | 0.087 |
| 238   | 0.031 | 0.087 |
| 238.5 | 0.031 | 0.087 |
| 239   | 0.031 | 0.087 |
| 239.5 | 0.031 | 0.087 |
| 240   | 0.031 | 0.086 |
| 240.5 | 0.031 | 0.086 |
| 241   | 0.031 | 0.086 |
| 241.5 | 0.031 | 0.086 |
| 242   | 0.031 | 0.086 |
| 242.5 | 0.031 | 0.086 |

|       |       |       |
|-------|-------|-------|
| 243   | 0.031 | 0.086 |
| 243.5 | 0.031 | 0.086 |
| 244   | 0.031 | 0.085 |
| 244.5 | 0.031 | 0.085 |
| 245   | 0.031 | 0.085 |
| 245.5 | 0.031 | 0.085 |
| 246   | 0.031 | 0.085 |
| 246.5 | 0.031 | 0.085 |
| 247   | 0.031 | 0.085 |
| 247.5 | 0.031 | 0.084 |
| 248   | 0.031 | 0.084 |
| 248.5 | 0.031 | 0.084 |
| 249   | 0.031 | 0.084 |
| 249.5 | 0.031 | 0.084 |
| 250   | 0.031 | 0.084 |
| 250.5 | 0.031 | 0.084 |
| 251   | 0.031 | 0.084 |
| 251.5 | 0.031 | 0.084 |
| 252   | 0.031 | 0.084 |
| 252.5 | 0.031 | 0.084 |
| 253   | 0.031 | 0.084 |
| 253.5 | 0.031 | 0.084 |
| 254   | 0.031 | 0.084 |
| 254.5 | 0.031 | 0.084 |
| 255   | 0.031 | 0.084 |
| 255.5 | 0.031 | 0.084 |
| 256   | 0.031 | 0.084 |
| 256.5 | 0.032 | 0.084 |
| 257   | 0.032 | 0.084 |
| 257.5 | 0.032 | 0.085 |
| 258   | 0.032 | 0.085 |
| 258.5 | 0.033 | 0.085 |
| 259   | 0.033 | 0.086 |
| 259.5 | 0.034 | 0.086 |
| 260   | 0.034 | 0.087 |
| 260.5 | 0.035 | 0.087 |
| 261   | 0.036 | 0.088 |
| 261.5 | 0.037 | 0.089 |
| 262   | 0.038 | 0.09  |
| 262.5 | 0.039 | 0.091 |
| 263   | 0.041 | 0.093 |
| 263.5 | 0.043 | 0.095 |
| 264   | 0.045 | 0.097 |
| 264.5 | 0.048 | 0.1   |

|       |       |       |
|-------|-------|-------|
| 265   | 0.051 | 0.103 |
| 265.5 | 0.054 | 0.106 |
| 266   | 0.058 | 0.11  |
| 266.5 | 0.063 | 0.115 |
| 267   | 0.069 | 0.121 |
| 267.5 | 0.075 | 0.128 |
| 268   | 0.083 | 0.136 |
| 268.5 | 0.091 | 0.145 |
| 269   | 0.101 | 0.155 |
| 269.5 | 0.113 | 0.168 |
| 270   | 0.127 | 0.182 |
| 270.5 | 0.142 | 0.198 |
| 271   | 0.159 | 0.216 |
| 271.5 | 0.179 | 0.237 |
| 272   | 0.202 | 0.261 |
| 272.5 | 0.228 | 0.288 |
| 273   | 0.258 | 0.319 |
| 273.5 | 0.291 | 0.353 |
| 274   | 0.329 | 0.392 |
| 274.5 | 0.371 | 0.435 |
| 275   | 0.418 | 0.485 |
| 275.5 | 0.471 | 0.54  |
| 276   | 0.53  | 0.601 |
| 276.5 | 0.595 | 0.67  |
| 277   | 0.668 | 0.746 |
| 277.5 | 0.747 | 0.828 |
| 278   | 0.834 | 0.918 |
| 278.5 | 0.927 | 1.016 |
| 279   | 1.03  | 1.123 |
| 279.5 | 1.142 | 1.239 |
| 280   | 1.263 | 1.366 |
| 280.5 | 1.394 | 1.501 |
| 281   | 1.533 | 1.646 |
| 281.5 | 1.683 | 1.802 |
| 282   | 1.844 | 1.969 |
| 282.5 | 2.016 | 2.146 |
| 283   | 2.199 | 2.336 |
| 283.5 | 2.394 | 2.538 |
| 284   | 2.596 | 2.746 |
| 284.5 | 2.809 | 2.965 |
| 285   | 3.031 | 3.195 |
| 285.5 | 3.263 | 3.436 |
| 286   | 3.509 | 3.688 |
| 286.5 | 3.767 | 3.956 |

|       |        |        |
|-------|--------|--------|
| 287   | 4.035  | 4.236  |
| 287.5 | 4.313  | 4.527  |
| 288   | 4.6    | 4.825  |
| 288.5 | 4.896  | 5.138  |
| 289   | 5.202  | 5.462  |
| 289.5 | 5.526  | 5.804  |
| 290   | 5.864  | 6.162  |
| 290.5 | 6.217  | 6.535  |
| 291   | 6.579  | 6.92   |
| 291.5 | 6.949  | 7.31   |
| 292   | 7.328  | 7.704  |
| 292.5 | 7.712  | 8.106  |
| 293   | 8.112  | 8.522  |
| 293.5 | 8.526  | 8.95   |
| 294   | 8.956  | 9.394  |
| 294.5 | 9.391  | 9.848  |
| 295   | 9.837  | 10.311 |
| 295.5 | 10.286 | 10.778 |
| 296   | 10.745 | 11.253 |
| 296.5 | 11.211 | 11.737 |
| 297   | 11.689 | 12.234 |
| 297.5 | 12.177 | 12.741 |
| 298   | 12.666 | 13.251 |
| 298.5 | 13.159 | 13.768 |
| 299   | 13.654 | 14.288 |
| 299.5 | 14.166 | 14.824 |
| 300   | 14.678 | 15.361 |
| 300.5 | 15.192 | 15.902 |
| 301   | 15.712 | 16.442 |
| 301.5 | 16.24  | 16.987 |
| 302   | 16.757 | 17.518 |
| 302.5 | 17.275 | 18.047 |
| 303   | 17.803 | 18.582 |
| 303.5 | 18.334 | 19.119 |
| 304   | 18.862 | 19.653 |
| 304.5 | 19.392 | 20.182 |
| 305   | 19.921 | 20.715 |
| 305.5 | 20.45  | 21.24  |
| 306   | 20.972 | 21.765 |
| 306.5 | 21.487 | 22.291 |
| 307   | 22.001 | 22.819 |
| 307.5 | 22.514 | 23.349 |
| 308   | 23.012 | 23.873 |
| 308.5 | 23.509 | 24.393 |

|       |        |        |
|-------|--------|--------|
| 309   | 24.002 | 24.9   |
| 309.5 | 24.458 | 25.373 |
| 310   | 24.903 | 25.829 |
| 310.5 | 25.351 | 26.284 |
| 311   | 25.791 | 26.731 |
| 311.5 | 26.22  | 27.17  |
| 312   | 26.68  | 27.634 |
| 312.5 | 27.135 | 28.097 |
| 313   | 27.592 | 28.563 |
| 313.5 | 28.043 | 29.022 |
| 314   | 28.496 | 29.487 |
| 314.5 | 28.929 | 29.94  |
| 315   | 29.36  | 30.398 |
| 315.5 | 29.775 | 30.841 |
| 316   | 30.185 | 31.28  |
| 316.5 | 30.584 | 31.705 |
| 317   | 30.985 | 32.128 |
| 317.5 | 31.373 | 32.533 |
| 318   | 31.762 | 32.933 |
| 318.5 | 32.142 | 33.325 |
| 319   | 32.509 | 33.711 |
| 319.5 | 32.872 | 34.087 |
| 320   | 33.234 | 34.455 |
| 320.5 | 33.579 | 34.807 |
| 321   | 33.927 | 35.158 |
| 321.5 | 34.271 | 35.501 |
| 322   | 34.612 | 35.845 |
| 322.5 | 34.951 | 36.187 |
| 323   | 35.285 | 36.532 |
| 323.5 | 35.607 | 36.863 |
| 324   | 35.929 | 37.195 |
| 324.5 | 36.238 | 37.512 |
| 325   | 36.545 | 37.829 |
| 325.5 | 36.85  | 38.14  |
| 326   | 37.155 | 38.454 |
| 326.5 | 37.462 | 38.758 |
| 327   | 37.771 | 39.062 |
| 327.5 | 38.075 | 39.354 |
| 328   | 38.375 | 39.645 |
| 328.5 | 38.668 | 39.922 |
| 329   | 38.959 | 40.199 |
| 329.5 | 39.246 | 40.475 |
| 330   | 39.526 | 40.747 |
| 330.5 | 39.81  | 41.017 |

|       |        |        |
|-------|--------|--------|
| 331   | 40.089 | 41.292 |
| 331.5 | 40.36  | 41.555 |
| 332   | 40.631 | 41.829 |
| 332.5 | 40.901 | 42.093 |
| 333   | 41.165 | 42.35  |
| 333.5 | 41.435 | 42.612 |
| 334   | 41.7   | 42.872 |
| 334.5 | 41.956 | 43.117 |
| 335   | 42.207 | 43.359 |
| 335.5 | 42.455 | 43.601 |
| 336   | 42.691 | 43.829 |
| 336.5 | 42.934 | 44.058 |
| 337   | 43.19  | 44.299 |
| 337.5 | 43.442 | 44.54  |
| 338   | 43.692 | 44.78  |
| 338.5 | 43.948 | 45.024 |
| 339   | 44.198 | 45.269 |
| 339.5 | 44.422 | 45.495 |
| 340   | 44.658 | 45.727 |
| 340.5 | 44.887 | 45.963 |
| 341   | 45.114 | 46.198 |
| 341.5 | 45.338 | 46.425 |
| 342   | 45.568 | 46.657 |
| 342.5 | 45.786 | 46.888 |
| 343   | 46.012 | 47.111 |
| 343.5 | 46.233 | 47.329 |
| 344   | 46.454 | 47.554 |
| 344.5 | 46.67  | 47.772 |
| 345   | 46.892 | 47.99  |
| 345.5 | 47.098 | 48.199 |
| 346   | 47.309 | 48.414 |
| 346.5 | 47.507 | 48.627 |
| 347   | 47.713 | 48.835 |
| 347.5 | 47.901 | 49.037 |
| 348   | 48.101 | 49.246 |
| 348.5 | 48.288 | 49.446 |
| 349   | 48.482 | 49.643 |
| 349.5 | 48.655 | 49.832 |
| 350   | 48.838 | 50.022 |
| 350.5 | 49.011 | 50.21  |
| 351   | 49.184 | 50.392 |
| 351.5 | 49.349 | 50.569 |
| 352   | 49.517 | 50.748 |
| 352.5 | 49.681 | 50.921 |



|       |        |        |
|-------|--------|--------|
| 353   | 49.833 | 51.086 |
| 353.5 | 49.986 | 51.251 |
| 354   | 50.146 | 51.42  |
| 354.5 | 50.304 | 51.584 |
| 355   | 50.453 | 51.738 |
| 355.5 | 50.609 | 51.898 |
| 356   | 50.76  | 52.064 |
| 356.5 | 50.898 | 52.209 |
| 357   | 51.041 | 52.358 |
| 357.5 | 51.188 | 52.516 |
| 358   | 51.333 | 52.664 |
| 358.5 | 51.466 | 52.799 |
| 359   | 51.601 | 52.946 |
| 359.5 | 51.75  | 53.099 |
| 360   | 51.883 | 53.239 |
| 360.5 | 52.022 | 53.382 |
| 361   | 52.168 | 53.523 |
| 361.5 | 52.31  | 53.667 |
| 362   | 52.426 | 53.792 |
| 362.5 | 52.555 | 53.916 |
| 363   | 52.679 | 54.042 |
| 363.5 | 52.798 | 54.163 |
| 364   | 52.916 | 54.273 |
| 364.5 | 53.044 | 54.387 |
| 365   | 53.172 | 54.508 |
| 365.5 | 53.297 | 54.622 |
| 366   | 53.424 | 54.739 |
| 366.5 | 53.554 | 54.853 |
| 367   | 53.67  | 54.963 |
| 367.5 | 53.786 | 55.075 |
| 368   | 53.906 | 55.185 |
| 368.5 | 54.02  | 55.292 |
| 369   | 54.14  | 55.407 |
| 369.5 | 54.262 | 55.519 |
| 370   | 54.384 | 55.625 |
| 370.5 | 54.501 | 55.729 |
| 371   | 54.618 | 55.832 |
| 371.5 | 54.732 | 55.931 |
| 372   | 54.855 | 56.035 |
| 372.5 | 54.972 | 56.14  |
| 373   | 55.088 | 56.244 |
| 373.5 | 55.21  | 56.347 |
| 374   | 55.342 | 56.462 |
| 374.5 | 55.463 | 56.577 |

|       |        |        |
|-------|--------|--------|
| 375   | 55.6   | 56.694 |
| 375.5 | 55.732 | 56.806 |
| 376   | 55.868 | 56.927 |
| 376.5 | 55.991 | 57.042 |
| 377   | 56.12  | 57.147 |
| 377.5 | 56.237 | 57.253 |
| 378   | 56.359 | 57.374 |
| 378.5 | 56.485 | 57.486 |
| 379   | 56.611 | 57.589 |
| 379.5 | 56.734 | 57.705 |
| 380   | 56.857 | 57.821 |
| 380.5 | 56.981 | 57.926 |
| 381   | 57.102 | 58.036 |
| 381.5 | 57.224 | 58.147 |
| 382   | 57.348 | 58.257 |
| 382.5 | 57.483 | 58.371 |
| 383   | 57.615 | 58.49  |
| 383.5 | 57.744 | 58.614 |
| 384   | 57.874 | 58.741 |
| 384.5 | 58.001 | 58.87  |
| 385   | 58.124 | 58.989 |
| 385.5 | 58.257 | 59.113 |
| 386   | 58.386 | 59.23  |
| 386.5 | 58.508 | 59.343 |
| 387   | 58.641 | 59.459 |
| 387.5 | 58.767 | 59.582 |
| 388   | 58.889 | 59.705 |
| 388.5 | 59.018 | 59.832 |
| 389   | 59.147 | 59.96  |
| 389.5 | 59.274 | 60.086 |
| 390   | 59.395 | 60.212 |
| 390.5 | 59.52  | 60.337 |
| 391   | 59.642 | 60.459 |
| 391.5 | 59.77  | 60.585 |
| 392   | 59.899 | 60.713 |
| 392.5 | 60.038 | 60.846 |
| 393   | 60.173 | 60.981 |
| 393.5 | 60.31  | 61.117 |
| 394   | 60.444 | 61.254 |
| 394.5 | 60.564 | 61.386 |
| 395   | 60.69  | 61.515 |
| 395.5 | 60.81  | 61.641 |
| 396   | 60.93  | 61.769 |
| 396.5 | 61.052 | 61.894 |

|       |        |        |
|-------|--------|--------|
| 397   | 61.187 | 62.025 |
| 397.5 | 61.313 | 62.16  |
| 398   | 61.436 | 62.293 |
| 398.5 | 61.561 | 62.422 |
| 399   | 61.683 | 62.548 |
| 399.5 | 61.791 | 62.68  |
| 400   | 61.9   | 62.802 |
| 400.5 | 62.022 | 62.923 |
| 401   | 62.133 | 63.052 |
| 401.5 | 62.253 | 63.185 |
| 402   | 62.38  | 63.307 |
| 402.5 | 62.506 | 63.436 |
| 403   | 62.619 | 63.567 |
| 403.5 | 62.737 | 63.688 |
| 404   | 62.842 | 63.802 |
| 404.5 | 62.94  | 63.911 |
| 405   | 63.039 | 64.019 |
| 405.5 | 63.141 | 64.12  |
| 406   | 63.242 | 64.226 |
| 406.5 | 63.339 | 64.326 |
| 407   | 63.435 | 64.433 |
| 407.5 | 63.531 | 64.532 |
| 408   | 63.621 | 64.634 |
| 408.5 | 63.704 | 64.727 |
| 409   | 63.795 | 64.826 |
| 409.5 | 63.886 | 64.915 |
| 410   | 63.97  | 65.002 |
| 410.5 | 64.048 | 65.087 |
| 411   | 64.129 | 65.166 |
| 411.5 | 64.207 | 65.244 |
| 412   | 64.277 | 65.32  |
| 412.5 | 64.345 | 65.395 |
| 413   | 64.419 | 65.468 |
| 413.5 | 64.498 | 65.546 |
| 414   | 64.567 | 65.621 |
| 414.5 | 64.644 | 65.699 |
| 415   | 64.725 | 65.777 |
| 415.5 | 64.803 | 65.855 |
| 416   | 64.868 | 65.927 |
| 416.5 | 64.933 | 65.999 |
| 417   | 64.997 | 66.069 |
| 417.5 | 65.063 | 66.134 |
| 418   | 65.125 | 66.194 |
| 418.5 | 65.191 | 66.259 |

|       |        |        |
|-------|--------|--------|
| 419   | 65.262 | 66.32  |
| 419.5 | 65.329 | 66.381 |
| 420   | 65.391 | 66.441 |
| 420.5 | 65.452 | 66.506 |
| 421   | 65.513 | 66.562 |
| 421.5 | 65.57  | 66.618 |
| 422   | 65.63  | 66.672 |
| 422.5 | 65.688 | 66.726 |
| 423   | 65.749 | 66.772 |
| 423.5 | 65.809 | 66.825 |
| 424   | 65.87  | 66.877 |
| 424.5 | 65.933 | 66.933 |
| 425   | 65.987 | 66.978 |
| 425.5 | 66.045 | 67.032 |
| 426   | 66.101 | 67.088 |
| 426.5 | 66.161 | 67.138 |
| 427   | 66.216 | 67.186 |
| 427.5 | 66.272 | 67.243 |
| 428   | 66.33  | 67.294 |
| 428.5 | 66.389 | 67.335 |
| 429   | 66.442 | 67.382 |
| 429.5 | 66.494 | 67.426 |
| 430   | 66.556 | 67.476 |
| 430.5 | 66.618 | 67.522 |
| 431   | 66.669 | 67.571 |
| 431.5 | 66.728 | 67.625 |
| 432   | 66.791 | 67.669 |
| 432.5 | 66.843 | 67.706 |
| 433   | 66.894 | 67.752 |
| 433.5 | 66.951 | 67.798 |
| 434   | 67.004 | 67.838 |
| 434.5 | 67.054 | 67.882 |
| 435   | 67.102 | 67.933 |
| 435.5 | 67.16  | 67.98  |
| 436   | 67.217 | 68.026 |
| 436.5 | 67.272 | 68.072 |
| 437   | 67.329 | 68.128 |
| 437.5 | 67.395 | 68.175 |
| 438   | 67.454 | 68.224 |
| 438.5 | 67.516 | 68.272 |
| 439   | 67.577 | 68.327 |
| 439.5 | 67.645 | 68.376 |
| 440   | 67.711 | 68.434 |
| 440.5 | 67.772 | 68.488 |

|       |        |        |
|-------|--------|--------|
| 441   | 67.84  | 68.552 |
| 441.5 | 67.911 | 68.61  |
| 442   | 67.974 | 68.668 |
| 442.5 | 68.034 | 68.733 |
| 443   | 68.101 | 68.791 |
| 443.5 | 68.164 | 68.847 |
| 444   | 68.233 | 68.91  |
| 444.5 | 68.31  | 68.979 |
| 445   | 68.388 | 69.038 |
| 445.5 | 68.47  | 69.107 |
| 446   | 68.549 | 69.176 |
| 446.5 | 68.631 | 69.254 |
| 447   | 68.707 | 69.32  |
| 447.5 | 68.783 | 69.392 |
| 448   | 68.859 | 69.472 |
| 448.5 | 68.938 | 69.546 |
| 449   | 69.011 | 69.611 |
| 449.5 | 69.091 | 69.687 |
| 450   | 69.168 | 69.763 |
| 450.5 | 69.253 | 69.836 |
| 451   | 69.336 | 69.91  |
| 451.5 | 69.418 | 69.985 |
| 452   | 69.506 | 70.069 |
| 452.5 | 69.594 | 70.147 |
| 453   | 69.677 | 70.228 |
| 453.5 | 69.759 | 70.313 |
| 454   | 69.844 | 70.392 |
| 454.5 | 69.922 | 70.473 |
| 455   | 70.006 | 70.556 |
| 455.5 | 70.084 | 70.633 |
| 456   | 70.167 | 70.713 |
| 456.5 | 70.247 | 70.794 |
| 457   | 70.331 | 70.879 |
| 457.5 | 70.424 | 70.973 |
| 458   | 70.523 | 71.066 |
| 458.5 | 70.614 | 71.162 |
| 459   | 70.706 | 71.256 |
| 459.5 | 70.787 | 71.339 |
| 460   | 70.873 | 71.425 |
| 460.5 | 70.949 | 71.507 |
| 461   | 71.034 | 71.581 |
| 461.5 | 71.115 | 71.669 |
| 462   | 71.207 | 71.752 |
| 462.5 | 71.285 | 71.831 |

|       |        |        |
|-------|--------|--------|
| 463   | 71.374 | 71.918 |
| 463.5 | 71.456 | 72.011 |
| 464   | 71.538 | 72.096 |
| 464.5 | 71.624 | 72.183 |
| 465   | 71.697 | 72.264 |
| 465.5 | 71.767 | 72.35  |
| 466   | 71.838 | 72.431 |
| 466.5 | 71.918 | 72.51  |
| 467   | 72.001 | 72.594 |
| 467.5 | 72.081 | 72.678 |
| 468   | 72.158 | 72.751 |
| 468.5 | 72.235 | 72.821 |
| 469   | 72.308 | 72.902 |
| 469.5 | 72.364 | 72.975 |
| 470   | 72.436 | 73.047 |
| 470.5 | 72.508 | 73.119 |
| 471   | 72.587 | 73.207 |
| 471.5 | 72.655 | 73.278 |
| 472   | 72.734 | 73.355 |
| 472.5 | 72.807 | 73.428 |
| 473   | 72.871 | 73.502 |
| 473.5 | 72.934 | 73.563 |
| 474   | 73     | 73.629 |
| 474.5 | 73.053 | 73.692 |
| 475   | 73.113 | 73.756 |
| 475.5 | 73.175 | 73.817 |
| 476   | 73.236 | 73.883 |
| 476.5 | 73.296 | 73.953 |
| 477   | 73.367 | 74.023 |
| 477.5 | 73.432 | 74.089 |
| 478   | 73.492 | 74.156 |
| 478.5 | 73.55  | 74.221 |
| 479   | 73.614 | 74.28  |
| 479.5 | 73.669 | 74.339 |
| 480   | 73.723 | 74.404 |
| 480.5 | 73.786 | 74.467 |
| 481   | 73.842 | 74.523 |
| 481.5 | 73.895 | 74.579 |
| 482   | 73.951 | 74.642 |
| 482.5 | 74.009 | 74.701 |
| 483   | 74.058 | 74.751 |
| 483.5 | 74.11  | 74.809 |
| 484   | 74.157 | 74.868 |
| 484.5 | 74.211 | 74.916 |

|       |        |        |
|-------|--------|--------|
| 485   | 74.249 | 74.959 |
| 485.5 | 74.297 | 75.014 |
| 486   | 74.351 | 75.062 |
| 486.5 | 74.399 | 75.11  |
| 487   | 74.445 | 75.156 |
| 487.5 | 74.499 | 75.205 |
| 488   | 74.549 | 75.245 |
| 488.5 | 74.591 | 75.29  |
| 489   | 74.631 | 75.334 |
| 489.5 | 74.675 | 75.37  |
| 490   | 74.718 | 75.412 |
| 490.5 | 74.746 | 75.458 |
| 491   | 74.773 | 75.495 |
| 491.5 | 74.813 | 75.528 |
| 492   | 74.839 | 75.568 |
| 492.5 | 74.868 | 75.599 |
| 493   | 74.907 | 75.629 |
| 493.5 | 74.947 | 75.662 |
| 494   | 74.974 | 75.693 |
| 494.5 | 75.001 | 75.725 |
| 495   | 75.029 | 75.756 |
| 495.5 | 75.056 | 75.78  |
| 496   | 75.075 | 75.805 |
| 496.5 | 75.098 | 75.831 |
| 497   | 75.129 | 75.849 |
| 497.5 | 75.156 | 75.87  |
| 498   | 75.178 | 75.897 |
| 498.5 | 75.211 | 75.92  |
| 499   | 75.245 | 75.945 |
| 499.5 | 75.268 | 75.967 |
| 500   | 75.288 | 75.989 |
| 500.5 | 75.312 | 76.013 |
| 501   | 75.333 | 76.032 |
| 501.5 | 75.342 | 76.044 |
| 502   | 75.359 | 76.072 |
| 502.5 | 75.387 | 76.086 |
| 503   | 75.409 | 76.098 |
| 503.5 | 75.425 | 76.107 |
| 504   | 75.449 | 76.122 |
| 504.5 | 75.474 | 76.127 |
| 505   | 75.491 | 76.142 |
| 505.5 | 75.508 | 76.159 |
| 506   | 75.525 | 76.178 |
| 506.5 | 75.549 | 76.193 |

|       |        |        |
|-------|--------|--------|
| 507   | 75.569 | 76.207 |
| 507.5 | 75.58  | 76.225 |
| 508   | 75.603 | 76.237 |
| 508.5 | 75.625 | 76.248 |
| 509   | 75.649 | 76.267 |
| 509.5 | 75.669 | 76.286 |
| 510   | 75.697 | 76.3   |
| 510.5 | 75.716 | 76.318 |
| 511   | 75.734 | 76.34  |
| 511.5 | 75.746 | 76.354 |
| 512   | 75.765 | 76.371 |
| 512.5 | 75.783 | 76.385 |
| 513   | 75.793 | 76.399 |
| 513.5 | 75.823 | 76.417 |
| 514   | 75.84  | 76.431 |
| 514.5 | 75.858 | 76.446 |
| 515   | 75.871 | 76.461 |
| 515.5 | 75.902 | 76.478 |
| 516   | 75.913 | 76.484 |
| 516.5 | 75.939 | 76.499 |
| 517   | 75.953 | 76.513 |
| 517.5 | 75.985 | 76.537 |
| 518   | 76.005 | 76.551 |
| 518.5 | 76.027 | 76.568 |
| 519   | 76.05  | 76.592 |
| 519.5 | 76.079 | 76.608 |
| 520   | 76.101 | 76.622 |
| 520.5 | 76.125 | 76.64  |
| 521   | 76.155 | 76.665 |
| 521.5 | 76.18  | 76.678 |
| 522   | 76.201 | 76.702 |
| 522.5 | 76.227 | 76.72  |
| 523   | 76.25  | 76.74  |
| 523.5 | 76.27  | 76.763 |
| 524   | 76.297 | 76.789 |
| 524.5 | 76.334 | 76.812 |
| 525   | 76.356 | 76.834 |
| 525.5 | 76.387 | 76.859 |
| 526   | 76.416 | 76.88  |
| 526.5 | 76.453 | 76.912 |
| 527   | 76.475 | 76.936 |
| 527.5 | 76.509 | 76.97  |
| 528   | 76.542 | 77.001 |
| 528.5 | 76.578 | 77.031 |



|       |        |        |
|-------|--------|--------|
| 529   | 76.605 | 77.055 |
| 529.5 | 76.649 | 77.095 |
| 530   | 76.69  | 77.128 |
| 530.5 | 76.719 | 77.154 |
| 531   | 76.756 | 77.183 |
| 531.5 | 76.787 | 77.206 |
| 532   | 76.809 | 77.226 |
| 532.5 | 76.833 | 77.245 |
| 533   | 76.873 | 77.273 |
| 533.5 | 76.905 | 77.311 |
| 534   | 76.938 | 77.349 |
| 534.5 | 76.979 | 77.385 |
| 535   | 77.013 | 77.422 |
| 535.5 | 77.054 | 77.463 |
| 536   | 77.083 | 77.491 |
| 536.5 | 77.127 | 77.526 |
| 537   | 77.16  | 77.553 |
| 537.5 | 77.202 | 77.586 |
| 538   | 77.231 | 77.617 |
| 538.5 | 77.272 | 77.647 |
| 539   | 77.303 | 77.681 |
| 539.5 | 77.342 | 77.722 |
| 540   | 77.379 | 77.763 |
| 540.5 | 77.421 | 77.804 |
| 541   | 77.462 | 77.849 |
| 541.5 | 77.506 | 77.887 |
| 542   | 77.555 | 77.925 |
| 542.5 | 77.597 | 77.966 |
| 543   | 77.637 | 78     |
| 543.5 | 77.671 | 78.036 |
| 544   | 77.709 | 78.076 |
| 544.5 | 77.747 | 78.116 |
| 545   | 77.787 | 78.153 |
| 545.5 | 77.831 | 78.199 |
| 546   | 77.881 | 78.244 |
| 546.5 | 77.928 | 78.287 |
| 547   | 77.966 | 78.329 |
| 547.5 | 78.014 | 78.375 |
| 548   | 78.055 | 78.412 |
| 548.5 | 78.096 | 78.456 |
| 549   | 78.138 | 78.497 |
| 549.5 | 78.186 | 78.536 |
| 550   | 78.234 | 78.581 |
| 550.5 | 78.286 | 78.627 |

|       |        |        |
|-------|--------|--------|
| 551   | 78.335 | 78.67  |
| 551.5 | 78.376 | 78.716 |
| 552   | 78.423 | 78.766 |
| 552.5 | 78.459 | 78.809 |
| 553   | 78.502 | 78.858 |
| 553.5 | 78.547 | 78.909 |
| 554   | 78.603 | 78.962 |
| 554.5 | 78.644 | 79.008 |
| 555   | 78.694 | 79.053 |
| 555.5 | 78.74  | 79.102 |
| 556   | 78.778 | 79.144 |
| 556.5 | 78.82  | 79.185 |
| 557   | 78.866 | 79.232 |
| 557.5 | 78.916 | 79.283 |
| 558   | 78.954 | 79.322 |
| 558.5 | 79.012 | 79.366 |
| 559   | 79.056 | 79.405 |
| 559.5 | 79.103 | 79.453 |
| 560   | 79.137 | 79.486 |
| 560.5 | 79.187 | 79.532 |
| 561   | 79.221 | 79.579 |
| 561.5 | 79.258 | 79.629 |
| 562   | 79.299 | 79.668 |
| 562.5 | 79.349 | 79.719 |
| 563   | 79.399 | 79.768 |
| 563.5 | 79.446 | 79.81  |
| 564   | 79.499 | 79.85  |
| 564.5 | 79.544 | 79.888 |
| 565   | 79.582 | 79.93  |
| 565.5 | 79.615 | 79.966 |
| 566   | 79.654 | 80     |
| 566.5 | 79.689 | 80.042 |
| 567   | 79.726 | 80.086 |
| 567.5 | 79.769 | 80.118 |
| 568   | 79.804 | 80.161 |
| 568.5 | 79.844 | 80.207 |
| 569   | 79.875 | 80.247 |
| 569.5 | 79.91  | 80.282 |
| 570   | 79.942 | 80.323 |
| 570.5 | 79.974 | 80.356 |
| 571   | 80.001 | 80.39  |
| 571.5 | 80.04  | 80.424 |
| 572   | 80.065 | 80.454 |
| 572.5 | 80.088 | 80.486 |

|       |        |        |
|-------|--------|--------|
| 573   | 80.121 | 80.518 |
| 573.5 | 80.148 | 80.551 |
| 574   | 80.184 | 80.583 |
| 574.5 | 80.213 | 80.621 |
| 575   | 80.247 | 80.655 |
| 575.5 | 80.277 | 80.689 |
| 576   | 80.306 | 80.717 |
| 576.5 | 80.318 | 80.74  |
| 577   | 80.353 | 80.761 |
| 577.5 | 80.381 | 80.787 |
| 578   | 80.406 | 80.816 |
| 578.5 | 80.435 | 80.845 |
| 579   | 80.468 | 80.875 |
| 579.5 | 80.498 | 80.906 |
| 580   | 80.518 | 80.932 |
| 580.5 | 80.547 | 80.954 |
| 581   | 80.574 | 80.977 |
| 581.5 | 80.608 | 81.014 |
| 582   | 80.629 | 81.042 |
| 582.5 | 80.66  | 81.067 |
| 583   | 80.674 | 81.095 |
| 583.5 | 80.697 | 81.119 |
| 584   | 80.711 | 81.135 |
| 584.5 | 80.738 | 81.157 |
| 585   | 80.764 | 81.184 |
| 585.5 | 80.797 | 81.205 |
| 586   | 80.822 | 81.235 |
| 586.5 | 80.85  | 81.263 |
| 587   | 80.876 | 81.289 |
| 587.5 | 80.904 | 81.32  |
| 588   | 80.925 | 81.342 |
| 588.5 | 80.952 | 81.374 |
| 589   | 80.97  | 81.397 |
| 589.5 | 80.988 | 81.429 |
| 590   | 80.998 | 81.447 |
| 590.5 | 81.014 | 81.472 |
| 591   | 81.037 | 81.486 |
| 591.5 | 81.054 | 81.499 |
| 592   | 81.074 | 81.507 |
| 592.5 | 81.092 | 81.516 |
| 593   | 81.115 | 81.535 |
| 593.5 | 81.125 | 81.558 |
| 594   | 81.145 | 81.582 |
| 594.5 | 81.153 | 81.601 |

|       |        |        |
|-------|--------|--------|
| 595   | 81.17  | 81.623 |
| 595.5 | 81.185 | 81.639 |
| 596   | 81.199 | 81.644 |
| 596.5 | 81.206 | 81.654 |
| 597   | 81.21  | 81.658 |
| 597.5 | 81.218 | 81.666 |
| 598   | 81.222 | 81.66  |
| 598.5 | 81.225 | 81.665 |
| 599   | 81.232 | 81.669 |
| 599.5 | 81.255 | 81.684 |
| 600   | 81.264 | 81.696 |
| 600.5 | 81.277 | 81.719 |
| 601   | 81.293 | 81.736 |
| 601.5 | 81.307 | 81.749 |
| 602   | 81.318 | 81.758 |
| 602.5 | 81.327 | 81.767 |
| 603   | 81.333 | 81.772 |
| 603.5 | 81.338 | 81.772 |
| 604   | 81.348 | 81.778 |
| 604.5 | 81.345 | 81.792 |
| 605   | 81.356 | 81.795 |
| 605.5 | 81.369 | 81.803 |
| 606   | 81.376 | 81.808 |
| 606.5 | 81.383 | 81.818 |
| 607   | 81.398 | 81.813 |
| 607.5 | 81.409 | 81.823 |
| 608   | 81.406 | 81.822 |
| 608.5 | 81.416 | 81.833 |
| 609   | 81.419 | 81.83  |
| 609.5 | 81.418 | 81.839 |
| 610   | 81.411 | 81.842 |
| 610.5 | 81.417 | 81.844 |
| 611   | 81.418 | 81.848 |
| 611.5 | 81.421 | 81.852 |
| 612   | 81.419 | 81.851 |
| 612.5 | 81.43  | 81.852 |
| 613   | 81.43  | 81.86  |
| 613.5 | 81.425 | 81.855 |
| 614   | 81.431 | 81.859 |
| 614.5 | 81.437 | 81.859 |
| 615   | 81.43  | 81.857 |
| 615.5 | 81.439 | 81.86  |
| 616   | 81.446 | 81.856 |
| 616.5 | 81.443 | 81.849 |

|       |        |        |
|-------|--------|--------|
| 617   | 81.451 | 81.85  |
| 617.5 | 81.457 | 81.856 |
| 618   | 81.451 | 81.848 |
| 618.5 | 81.45  | 81.851 |
| 619   | 81.446 | 81.851 |
| 619.5 | 81.443 | 81.849 |
| 620   | 81.445 | 81.843 |
| 620.5 | 81.455 | 81.845 |
| 621   | 81.461 | 81.85  |
| 621.5 | 81.47  | 81.85  |
| 622   | 81.468 | 81.854 |
| 622.5 | 81.469 | 81.853 |
| 623   | 81.467 | 81.861 |
| 623.5 | 81.466 | 81.854 |
| 624   | 81.47  | 81.862 |
| 624.5 | 81.474 | 81.86  |
| 625   | 81.476 | 81.862 |
| 625.5 | 81.475 | 81.849 |
| 626   | 81.472 | 81.852 |
| 626.5 | 81.468 | 81.85  |
| 627   | 81.467 | 81.839 |
| 627.5 | 81.46  | 81.835 |
| 628   | 81.464 | 81.842 |
| 628.5 | 81.473 | 81.842 |
| 629   | 81.476 | 81.836 |
| 629.5 | 81.481 | 81.845 |
| 630   | 81.485 | 81.847 |
| 630.5 | 81.484 | 81.843 |
| 631   | 81.484 | 81.836 |
| 631.5 | 81.485 | 81.843 |
| 632   | 81.488 | 81.858 |
| 632.5 | 81.496 | 81.865 |
| 633   | 81.501 | 81.865 |
| 633.5 | 81.506 | 81.876 |
| 634   | 81.511 | 81.881 |
| 634.5 | 81.519 | 81.866 |
| 635   | 81.52  | 81.856 |
| 635.5 | 81.513 | 81.853 |
| 636   | 81.522 | 81.853 |
| 636.5 | 81.53  | 81.845 |
| 637   | 81.531 | 81.852 |
| 637.5 | 81.534 | 81.863 |
| 638   | 81.553 | 81.865 |
| 638.5 | 81.545 | 81.862 |

|       |        |        |
|-------|--------|--------|
| 639   | 81.548 | 81.862 |
| 639.5 | 81.551 | 81.864 |
| 640   | 81.565 | 81.866 |
| 640.5 | 81.574 | 81.876 |
| 641   | 81.585 | 81.882 |
| 641.5 | 81.587 | 81.894 |
| 642   | 81.591 | 81.889 |
| 642.5 | 81.594 | 81.89  |
| 643   | 81.599 | 81.897 |
| 643.5 | 81.609 | 81.899 |
| 644   | 81.621 | 81.899 |
| 644.5 | 81.633 | 81.904 |
| 645   | 81.635 | 81.91  |
| 645.5 | 81.636 | 81.913 |
| 646   | 81.64  | 81.919 |
| 646.5 | 81.641 | 81.919 |
| 647   | 81.637 | 81.927 |
| 647.5 | 81.645 | 81.926 |
| 648   | 81.656 | 81.931 |
| 648.5 | 81.657 | 81.94  |
| 649   | 81.663 | 81.945 |
| 649.5 | 81.674 | 81.95  |
| 650   | 81.685 | 81.953 |
| 650.5 | 81.689 | 81.954 |
| 651   | 81.71  | 81.957 |
| 651.5 | 81.732 | 81.965 |
| 652   | 81.747 | 81.976 |
| 652.5 | 81.752 | 81.99  |
| 653   | 81.763 | 81.999 |
| 653.5 | 81.766 | 82.01  |
| 654   | 81.772 | 82.031 |
| 654.5 | 81.78  | 82.04  |
| 655   | 81.784 | 82.05  |
| 655.5 | 81.794 | 82.06  |
| 656   | 81.806 | 82.074 |
| 656.5 | 81.813 | 82.067 |
| 657   | 81.833 | 82.078 |
| 657.5 | 81.847 | 82.075 |
| 658   | 81.858 | 82.081 |
| 658.5 | 81.865 | 82.076 |
| 659   | 81.872 | 82.087 |
| 659.5 | 81.883 | 82.103 |
| 660   | 81.899 | 82.115 |
| 660.5 | 81.903 | 82.138 |

|       |        |        |
|-------|--------|--------|
| 661   | 81.918 | 82.151 |
| 661.5 | 81.915 | 82.156 |
| 662   | 81.917 | 82.15  |
| 662.5 | 81.925 | 82.162 |
| 663   | 81.927 | 82.147 |
| 663.5 | 81.941 | 82.163 |
| 664   | 81.958 | 82.169 |
| 664.5 | 81.956 | 82.175 |
| 665   | 81.961 | 82.189 |
| 665.5 | 81.978 | 82.2   |
| 666   | 81.978 | 82.206 |
| 666.5 | 82.002 | 82.23  |
| 667   | 82.018 | 82.249 |
| 667.5 | 82.025 | 82.253 |
| 668   | 82.036 | 82.264 |
| 668.5 | 82.046 | 82.273 |
| 669   | 82.06  | 82.29  |
| 669.5 | 82.072 | 82.287 |
| 670   | 82.085 | 82.297 |
| 670.5 | 82.098 | 82.315 |
| 671   | 82.123 | 82.332 |
| 671.5 | 82.127 | 82.335 |
| 672   | 82.131 | 82.346 |
| 672.5 | 82.147 | 82.348 |
| 673   | 82.166 | 82.352 |
| 673.5 | 82.164 | 82.355 |
| 674   | 82.171 | 82.361 |
| 674.5 | 82.19  | 82.37  |
| 675   | 82.203 | 82.395 |
| 675.5 | 82.212 | 82.417 |
| 676   | 82.234 | 82.433 |
| 676.5 | 82.258 | 82.457 |
| 677   | 82.284 | 82.473 |
| 677.5 | 82.291 | 82.49  |
| 678   | 82.313 | 82.502 |
| 678.5 | 82.336 | 82.525 |
| 679   | 82.336 | 82.528 |
| 679.5 | 82.329 | 82.536 |
| 680   | 82.343 | 82.533 |
| 680.5 | 82.34  | 82.539 |
| 681   | 82.335 | 82.535 |
| 681.5 | 82.349 | 82.532 |
| 682   | 82.369 | 82.546 |
| 682.5 | 82.386 | 82.566 |

|       |        |        |
|-------|--------|--------|
| 683   | 82.402 | 82.576 |
| 683.5 | 82.413 | 82.584 |
| 684   | 82.424 | 82.597 |
| 684.5 | 82.451 | 82.617 |
| 685   | 82.477 | 82.633 |
| 685.5 | 82.494 | 82.652 |
| 686   | 82.502 | 82.665 |
| 686.5 | 82.522 | 82.694 |
| 687   | 82.527 | 82.712 |
| 687.5 | 82.529 | 82.717 |
| 688   | 82.536 | 82.719 |
| 688.5 | 82.559 | 82.741 |
| 689   | 82.571 | 82.742 |
| 689.5 | 82.579 | 82.741 |
| 690   | 82.59  | 82.748 |
| 690.5 | 82.609 | 82.772 |
| 691   | 82.611 | 82.776 |
| 691.5 | 82.609 | 82.782 |
| 692   | 82.622 | 82.795 |
| 692.5 | 82.621 | 82.808 |
| 693   | 82.625 | 82.81  |
| 693.5 | 82.646 | 82.83  |
| 694   | 82.673 | 82.847 |
| 694.5 | 82.677 | 82.863 |
| 695   | 82.706 | 82.879 |
| 695.5 | 82.72  | 82.887 |
| 696   | 82.727 | 82.897 |
| 696.5 | 82.731 | 82.912 |
| 697   | 82.745 | 82.909 |
| 697.5 | 82.751 | 82.924 |
| 698   | 82.765 | 82.941 |
| 698.5 | 82.771 | 82.945 |
| 699   | 82.783 | 82.947 |
| 699.5 | 82.795 | 82.971 |
| 700   | 82.799 | 82.978 |
| 700.5 | 82.808 | 82.991 |
| 701   | 82.813 | 82.995 |
| 701.5 | 82.825 | 83.019 |
| 702   | 82.827 | 83.037 |
| 702.5 | 82.841 | 83.034 |
| 703   | 82.838 | 83.039 |
| 703.5 | 82.856 | 83.06  |
| 704   | 82.855 | 83.055 |
| 704.5 | 82.868 | 83.054 |



|       |        |        |
|-------|--------|--------|
| 705   | 82.877 | 83.066 |
| 705.5 | 82.894 | 83.079 |
| 706   | 82.896 | 83.087 |
| 706.5 | 82.909 | 83.096 |
| 707   | 82.919 | 83.105 |
| 707.5 | 82.913 | 83.116 |
| 708   | 82.918 | 83.119 |
| 708.5 | 82.923 | 83.115 |
| 709   | 82.932 | 83.137 |
| 709.5 | 82.926 | 83.14  |
| 710   | 82.936 | 83.141 |
| 710.5 | 82.948 | 83.142 |
| 711   | 82.965 | 83.152 |
| 711.5 | 82.964 | 83.146 |
| 712   | 82.98  | 83.144 |
| 712.5 | 82.997 | 83.154 |
| 713   | 82.992 | 83.16  |
| 713.5 | 82.994 | 83.163 |
| 714   | 83.002 | 83.169 |
| 714.5 | 83.009 | 83.179 |
| 715   | 83.006 | 83.18  |
| 715.5 | 83.019 | 83.193 |
| 716   | 83.022 | 83.196 |
| 716.5 | 83.023 | 83.195 |
| 717   | 83.025 | 83.204 |
| 717.5 | 83.024 | 83.208 |
| 718   | 83.018 | 83.201 |
| 718.5 | 83.016 | 83.204 |
| 719   | 83.017 | 83.211 |
| 719.5 | 82.891 | 83.102 |
| 720   | 82.769 | 82.988 |
| 720.5 | 82.646 | 82.876 |
| 721   | 82.53  | 82.762 |
| 721.5 | 82.411 | 82.648 |
| 722   | 82.407 | 82.637 |
| 722.5 | 82.409 | 82.638 |
| 723   | 82.41  | 82.638 |
| 723.5 | 82.407 | 82.645 |
| 724   | 82.405 | 82.65  |
| 724.5 | 82.405 | 82.656 |
| 725   | 82.411 | 82.654 |
| 725.5 | 82.417 | 82.665 |
| 726   | 82.418 | 82.668 |
| 726.5 | 82.413 | 82.667 |

|       |        |        |
|-------|--------|--------|
| 727   | 82.414 | 82.66  |
| 727.5 | 82.409 | 82.668 |
| 728   | 82.407 | 82.665 |
| 728.5 | 82.404 | 82.652 |
| 729   | 82.403 | 82.649 |
| 729.5 | 82.408 | 82.658 |
| 730   | 82.411 | 82.663 |
| 730.5 | 82.408 | 82.657 |
| 731   | 82.401 | 82.655 |
| 731.5 | 82.4   | 82.647 |
| 732   | 82.401 | 82.647 |
| 732.5 | 82.392 | 82.635 |
| 733   | 82.381 | 82.638 |
| 733.5 | 82.376 | 82.633 |
| 734   | 82.377 | 82.631 |
| 734.5 | 82.371 | 82.628 |
| 735   | 82.367 | 82.624 |
| 735.5 | 82.361 | 82.61  |
| 736   | 82.361 | 82.6   |
| 736.5 | 82.357 | 82.602 |
| 737   | 82.354 | 82.589 |
| 737.5 | 82.354 | 82.576 |
| 738   | 82.352 | 82.563 |
| 738.5 | 82.356 | 82.57  |
| 739   | 82.352 | 82.57  |
| 739.5 | 82.345 | 82.561 |
| 740   | 82.34  | 82.557 |
| 740.5 | 82.338 | 82.568 |
| 741   | 82.331 | 82.562 |
| 741.5 | 82.323 | 82.552 |
| 742   | 82.309 | 82.548 |
| 742.5 | 82.302 | 82.546 |
| 743   | 82.293 | 82.541 |
| 743.5 | 82.277 | 82.528 |
| 744   | 82.269 | 82.519 |
| 744.5 | 82.264 | 82.515 |
| 745   | 82.259 | 82.511 |
| 745.5 | 82.26  | 82.494 |
| 746   | 82.255 | 82.486 |
| 746.5 | 82.246 | 82.473 |
| 747   | 82.246 | 82.465 |
| 747.5 | 82.229 | 82.448 |
| 748   | 82.208 | 82.432 |
| 748.5 | 82.194 | 82.426 |

|       |        |        |
|-------|--------|--------|
| 749   | 82.197 | 82.422 |
| 749.5 | 82.175 | 82.404 |
| 750   | 82.166 | 82.403 |
| 750.5 | 82.164 | 82.4   |
| 751   | 82.165 | 82.391 |
| 751.5 | 82.15  | 82.384 |
| 752   | 82.145 | 82.38  |
| 752.5 | 82.139 | 82.364 |
| 753   | 82.127 | 82.363 |
| 753.5 | 82.109 | 82.358 |
| 754   | 82.099 | 82.345 |
| 754.5 | 82.089 | 82.321 |
| 755   | 82.076 | 82.309 |
| 755.5 | 82.068 | 82.298 |
| 756   | 82.064 | 82.286 |
| 756.5 | 82.042 | 82.269 |
| 757   | 82.03  | 82.267 |
| 757.5 | 82.012 | 82.257 |
| 758   | 81.993 | 82.238 |
| 758.5 | 81.983 | 82.227 |
| 759   | 81.978 | 82.22  |
| 759.5 | 81.963 | 82.21  |
| 760   | 81.959 | 82.194 |
| 760.5 | 81.961 | 82.184 |
| 761   | 81.945 | 82.169 |
| 761.5 | 81.937 | 82.163 |
| 762   | 81.934 | 82.151 |
| 762.5 | 81.926 | 82.153 |
| 763   | 81.9   | 82.143 |
| 763.5 | 81.892 | 82.135 |
| 764   | 81.876 | 82.111 |
| 764.5 | 81.859 | 82.106 |
| 765   | 81.844 | 82.077 |
| 765.5 | 81.834 | 82.053 |
| 766   | 81.812 | 82.036 |
| 766.5 | 81.8   | 82.032 |
| 767   | 81.789 | 82.006 |
| 767.5 | 81.781 | 82.001 |
| 768   | 81.771 | 82.002 |
| 768.5 | 81.755 | 81.986 |
| 769   | 81.741 | 81.954 |
| 769.5 | 81.729 | 81.942 |
| 770   | 81.71  | 81.928 |
| 770.5 | 81.699 | 81.908 |

|       |        |        |
|-------|--------|--------|
| 771   | 81.689 | 81.894 |
| 771.5 | 81.67  | 81.887 |
| 772   | 81.651 | 81.872 |
| 772.5 | 81.64  | 81.856 |
| 773   | 81.624 | 81.841 |
| 773.5 | 81.615 | 81.833 |
| 774   | 81.605 | 81.825 |
| 774.5 | 81.602 | 81.822 |
| 775   | 81.584 | 81.802 |
| 775.5 | 81.573 | 81.788 |
| 776   | 81.557 | 81.763 |
| 776.5 | 81.546 | 81.742 |
| 777   | 81.516 | 81.72  |
| 777.5 | 81.504 | 81.709 |
| 778   | 81.495 | 81.69  |
| 778.5 | 81.487 | 81.688 |
| 779   | 81.487 | 81.689 |
| 779.5 | 81.477 | 81.674 |
| 780   | 81.465 | 81.656 |
| 780.5 | 81.445 | 81.65  |
| 781   | 81.426 | 81.633 |
| 781.5 | 81.4   | 81.609 |
| 782   | 81.389 | 81.596 |
| 782.5 | 81.371 | 81.587 |
| 783   | 81.358 | 81.578 |
| 783.5 | 81.351 | 81.569 |
| 784   | 81.328 | 81.546 |
| 784.5 | 81.321 | 81.532 |
| 785   | 81.311 | 81.514 |
| 785.5 | 81.311 | 81.497 |
| 786   | 81.297 | 81.475 |
| 786.5 | 81.291 | 81.464 |
| 787   | 81.271 | 81.454 |
| 787.5 | 81.258 | 81.448 |
| 788   | 81.247 | 81.435 |
| 788.5 | 81.234 | 81.425 |
| 789   | 81.219 | 81.421 |
| 789.5 | 81.206 | 81.407 |
| 790   | 81.208 | 81.393 |
| 790.5 | 81.179 | 81.376 |
| 791   | 81.159 | 81.354 |
| 791.5 | 81.157 | 81.341 |
| 792   | 81.155 | 81.329 |
| 792.5 | 81.139 | 81.32  |

|       |        |        |
|-------|--------|--------|
| 793   | 81.124 | 81.301 |
| 793.5 | 81.121 | 81.296 |
| 794   | 81.098 | 81.278 |
| 794.5 | 81.079 | 81.261 |
| 795   | 81.059 | 81.237 |
| 795.5 | 81.053 | 81.224 |
| 796   | 81.031 | 81.212 |
| 796.5 | 81.026 | 81.196 |
| 797   | 81.011 | 81.185 |
| 797.5 | 80.992 | 81.176 |
| 798   | 80.981 | 81.175 |
| 798.5 | 80.977 | 81.158 |
| 799   | 80.963 | 81.155 |
| 799.5 | 80.955 | 81.151 |
| 800   | 80.955 | 81.151 |

### The J-V data of the CBD-SnO<sub>2</sub> and CBD-SSO

| Voltage (V) | CBD-SnO <sub>2</sub> | CBD-SSO  |
|-------------|----------------------|----------|
| 2           | 0.19904              | 0.23497  |
| 1.91835     | 0.19668              | 0.22313  |
| 1.83675     | 0.18415              | 0.2109   |
| 1.7551      | 0.17871              | 0.21131  |
| 1.67345     | 0.1677               | 0.20027  |
| 1.59185     | 0.15549              | 0.18883  |
| 1.5102      | 0.14174              | 0.17732  |
| 1.42855     | 0.13357              | 0.16649  |
| 1.34695     | 0.10793              | 0.15613  |
| 1.2653      | 0.10227              | 0.14551  |
| 1.18365     | 0.09549              | 0.13505  |
| 1.10205     | 0.08949              | 0.12505  |
| 1.0204      | 0.08315              | 0.1148   |
| 0.9388      | 0.07674              | 0.10492  |
| 0.85715     | 0.07039              | 0.09498  |
| 0.7755      | 0.06401              | 0.08525  |
| 0.6939      | 0.0575               | 0.0757   |
| 0.61225     | 0.05085              | 0.06632  |
| 0.5306      | 0.0441               | 0.05708  |
| 0.449       | 0.03727              | 0.04797  |
| 0.36735     | 0.03039              | 0.039    |
| 0.2857      | 0.02352              | 0.03016  |
| 0.2041      | 0.01667              | 0.02141  |
| 0.12245     | 0.00988              | 0.01276  |
| 0.0408      | 0.00326              | 0.00421  |
| -0.0408     | -0.00325             | -0.00423 |
| -0.12245    | -0.00968             | -0.01257 |
| -0.2041     | -0.01601             | -0.02093 |
| -0.2857     | -0.02225             | -0.02925 |
| -0.36735    | -0.02838             | -0.0375  |
| -0.449      | -0.03439             | -0.04583 |
| -0.5306     | -0.0403              | -0.05419 |
| -0.61225    | -0.04607             | -0.06258 |
| -0.6939     | -0.05173             | -0.07098 |
| -0.7755     | -0.05727             | -0.07944 |
| -0.85715    | -0.06268             | -0.08792 |
| -0.9388     | -0.06825             | -0.09647 |
| -1.0204     | -0.07352             | -0.10499 |
| -1.10205    | -0.07891             | -0.11386 |
| -1.18365    | -0.08426             | -0.12305 |
| -1.2653     | -0.08975             | -0.1307  |
| -1.34695    | -0.0959              | -0.13747 |
| -1.42855    | -0.10176             | -0.1447  |
| -1.5102     | -0.1054              | -0.15256 |

|          |          |          |
|----------|----------|----------|
| -1.59185 | -0.10489 | -0.16065 |
| -1.67345 | -0.11886 | -0.16916 |
| -1.7551  | -0.13164 | -0.17783 |
| -1.83675 | -0.14295 | -0.18665 |
| -1.91835 | -0.15202 | -0.19594 |
| -2       | -0.1611  | -0.20507 |

### XPS scan of the S 2p of SnO<sub>2</sub> and SSO

|        |         |          |      |         |      |
|--------|---------|----------|------|---------|------|
| 174.08 | 5187.22 | 5030.753 | 5030 | 4989.25 | 5030 |
| 173.98 | 5371.54 | 5030.722 | 5030 | 4931.91 | 5030 |
| 173.88 | 5468.63 | 5030.691 | 5030 | 4904.99 | 5030 |
| 173.78 | 5307.93 | 5030.661 | 5030 | 5048.43 | 5030 |
| 173.68 | 5397.2  | 5030.63  | 5030 | 4934.84 | 5030 |
| 173.58 | 5312.29 | 5030.599 | 5030 | 4904.59 | 5030 |
| 173.48 | 5404.88 | 5030.568 | 5030 | 4919.03 | 5030 |
| 173.38 | 5441.47 | 5030.537 | 5030 | 4956.83 | 5030 |
| 173.28 | 5346.52 | 5030.506 | 5030 | 5132.66 | 5030 |
| 173.18 | 5257.29 | 5030.476 | 5030 | 5083.22 | 5030 |
| 173.08 | 5193.38 | 5030.445 | 5030 | 5058.46 | 5030 |
| 172.98 | 5295.64 | 5030.414 | 5030 | 4998.96 | 5030 |
| 172.88 | 5382.5  | 5030.383 | 5030 | 5011.49 | 5030 |
| 172.78 | 5381.74 | 5030.352 | 5030 | 4927.93 | 5030 |
| 172.68 | 5320.38 | 5030.321 | 5030 | 5080.44 | 5030 |
| 172.58 | 5320.57 | 5030.291 | 5030 | 5077.69 | 5030 |
| 172.48 | 5092.85 | 5030.26  | 5030 | 4960.86 | 5030 |
| 172.38 | 5301.56 | 5030.229 | 5030 | 4924.03 | 5030 |
| 172.28 | 5394.06 | 5030.198 | 5030 | 5004.77 | 5030 |
| 172.18 | 5391.68 | 5030.167 | 5030 | 5053.93 | 5030 |
| 172.08 | 5450.01 | 5031.273 | 5030 | 5035.71 | 5030 |
| 171.98 | 5466.45 | 5031.39  | 5030 | 5001.81 | 5030 |
| 171.88 | 5514.77 | 5031.554 | 5030 | 5027.47 | 5030 |
| 171.78 | 5472.81 | 5031.78  | 5030 | 5043.15 | 5030 |
| 171.68 | 5348.11 | 5032.086 | 5030 | 5028.01 | 5030 |
| 171.58 | 5445.96 | 5032.492 | 5030 | 5066.44 | 5030 |
| 171.48 | 5395.62 | 5033.024 | 5030 | 5073.83 | 5030 |
| 171.38 | 5412.17 | 5033.71  | 5030 | 4997.75 | 5030 |
| 171.28 | 5401.61 | 5034.585 | 5030 | 4995.25 | 5030 |
| 171.18 | 5321.74 | 5035.688 | 5030 | 5056.17 | 5030 |
| 171.08 | 5373.76 | 5037.059 | 5030 | 5090.89 | 5030 |
| 170.98 | 5348.13 | 5038.749 | 5030 | 5098.85 | 5030 |
| 170.88 | 5484.35 | 5040.804 | 5030 | 5074.18 | 5030 |
| 170.78 | 5578.55 | 5043.279 | 5030 | 4920.7  | 5030 |
| 170.68 | 5613.2  | 5046.225 | 5030 | 4945.33 | 5030 |
| 170.58 | 5353.92 | 5049.693 | 5030 | 4992.81 | 5030 |
| 170.48 | 5332.77 | 5053.729 | 5030 | 5114.46 | 5030 |
| 170.38 | 5439.18 | 5058.374 | 5030 | 4878.27 | 5030 |
| 170.28 | 5390.84 | 5063.657 | 5030 | 5082.18 | 5030 |
| 170.18 | 5601.94 | 5069.596 | 5030 | 5113.25 | 5030 |
| 170.08 | 5447.13 | 5076.188 | 5030 | 5035.03 | 5030 |
| 169.98 | 5468.25 | 5083.418 | 5030 | 5112.53 | 5030 |



|        |         |          |      |         |      |
|--------|---------|----------|------|---------|------|
| 169.88 | 5458.94 | 5091.244 | 5030 | 5180.55 | 5030 |
| 169.78 | 5433.12 | 5099.604 | 5030 | 5220.46 | 5030 |
| 169.68 | 5380.61 | 5108.409 | 5030 | 5203.88 | 5030 |
| 169.58 | 5577.68 | 5117.544 | 5030 | 5077.09 | 5030 |
| 169.48 | 5468.71 | 5126.877 | 5030 | 5178.93 | 5030 |
| 169.38 | 5332.59 | 5136.248 | 5030 | 5166.7  | 5030 |
| 169.28 | 5467.78 | 5145.485 | 5030 | 5092.13 | 5030 |
| 169.18 | 5393.5  | 5154.399 | 5030 | 5289.41 | 5030 |
| 169.08 | 5431.09 | 5162.796 | 5030 | 5145.05 | 5030 |
| 168.98 | 5392.98 | 5170.485 | 5030 | 5204.41 | 5030 |
| 168.88 | 5417.86 | 5177.277 | 5030 | 5096.06 | 5030 |
| 168.78 | 5412.79 | 5183.004 | 5030 | 5150.79 | 5030 |
| 168.68 | 5300.37 | 5187.512 | 5030 | 5142.52 | 5030 |
| 168.58 | 5383.54 | 5190.681 | 5030 | 5248.45 | 5030 |
| 168.48 | 5514.3  | 5192.423 | 5030 | 5217.62 | 5030 |
| 168.38 | 5426.46 | 5192.69  | 5030 | 5164.58 | 5030 |
| 168.28 | 5494.97 | 5191.473 | 5030 | 5158.77 | 5030 |
| 168.18 | 5482.5  | 5188.803 | 5030 | 5079.77 | 5030 |
| 168.08 | 5528.5  | 5184.757 | 5030 | 5193.38 | 5030 |
| 167.98 | 5567.39 | 5179.439 | 5030 | 5258.04 | 5030 |
| 167.88 | 5359.95 | 5172.993 | 5030 | 5107.19 | 5030 |
| 167.78 | 5426.69 | 5165.579 | 5030 | 5170.08 | 5030 |
| 167.68 | 5538.94 | 5157.379 | 5030 | 5120.35 | 5030 |
| 167.58 | 5533.93 | 5148.587 | 5030 | 5112.71 | 5030 |
| 167.48 | 5410.72 | 5139.395 | 5030 | 5061.18 | 5030 |
| 167.38 | 5441.63 | 5129.995 | 5030 | 5132.13 | 5030 |
| 167.28 | 5504.07 | 5120.565 | 5030 | 5244.43 | 5030 |
| 167.18 | 5567.97 | 5111.271 | 5030 | 5186.88 | 5030 |
| 167.08 | 5436.45 | 5102.258 | 5030 | 5192.92 | 5030 |
| 166.98 | 5385.53 | 5093.646 | 5030 | 5190.42 | 5030 |
| 166.88 | 5351.38 | 5085.537 | 5030 | 5152.26 | 5030 |
| 166.78 | 5431.49 | 5078     | 5030 | 5185.8  | 5030 |
| 166.68 | 5400.46 | 5071.087 | 5030 | 5127.51 | 5030 |
| 166.58 | 5401.8  | 5064.825 | 5030 | 5055.04 | 5030 |
| 166.48 | 5366.26 | 5059.219 | 5030 | 5250.36 | 5030 |
| 166.38 | 5431.32 | 5054.261 | 5030 | 5268.28 | 5030 |
| 166.28 | 5478.52 | 5049.924 | 5030 | 5173.04 | 5030 |
| 166.18 | 5570.56 | 5046.172 | 5030 | 5051.1  | 5030 |
| 166.08 | 5545.82 | 5042.961 | 5030 | 5007.77 | 5030 |
| 165.98 | 5286.76 | 5040.243 | 5030 | 5134.25 | 5030 |
| 165.88 | 5355.12 | 5037.964 | 5030 | 5138.62 | 5030 |
| 165.78 | 5447.63 | 5036.073 | 5030 | 4983.23 | 5030 |
| 165.68 | 5420.62 | 5034.518 | 5030 | 5051.12 | 5030 |
| 165.58 | 5543.37 | 5033.252 | 5030 | 5142.09 | 5030 |







## FTIR of SnO<sub>2</sub>, SSO, and H<sub>2</sub>SO<sub>4</sub>

|          |          |          |          |
|----------|----------|----------|----------|
| 500.4454 | 94.50378 | 75.00712 | 92.2331  |
| 500.9275 | 94.41347 | 74.9341  | 92.26058 |
| 501.4096 | 94.30776 | 74.88026 | 92.28847 |
| 501.8917 | 94.18702 | 74.84562 | 92.31251 |
| 502.3739 | 94.05603 | 74.82777 | 92.32828 |
| 502.856  | 93.91873 | 74.82199 | 92.33213 |
| 503.3381 | 93.77529 | 74.82187 | 92.32184 |
| 503.8203 | 93.62453 | 74.82047 | 92.29688 |
| 504.3024 | 93.46918 | 74.81172 | 92.25827 |
| 504.7845 | 93.32073 | 74.79167 | 92.20807 |
| 505.2666 | 93.19794 | 74.75903 | 92.14872 |
| 505.7487 | 93.12038 | 74.71479 | 92.08229 |
| 506.2309 | 93.09642 | 74.66124 | 92.00993 |
| 506.713  | 93.1145  | 74.60062 | 91.93155 |
| 507.1951 | 93.14187 | 74.53412 | 91.84617 |
| 507.6772 | 93.13539 | 74.4614  | 91.75268 |
| 508.1594 | 93.05919 | 74.38099 | 91.65093 |
| 508.6415 | 92.89964 | 74.29103 | 91.54259 |
| 509.1236 | 92.6731  | 74.19021 | 91.4315  |
| 509.6057 | 92.42043 | 74.07836 | 91.32326 |
| 510.0879 | 92.19353 | 73.95645 | 91.22408 |
| 510.57   | 92.03685 | 73.82614 | 91.13927 |
| 511.0521 | 91.97209 | 73.6891  | 91.07166 |
| 511.5342 | 91.99368 | 73.54643 | 91.02072 |
| 512.0164 | 92.07487 | 73.39855 | 90.98265 |
| 512.4985 | 92.1797  | 73.24542 | 90.9511  |
| 512.9806 | 92.27628 | 73.08693 | 90.91872 |
| 513.4627 | 92.34359 | 72.92335 | 90.87868 |
| 513.9448 | 92.37483 | 72.75569 | 90.82617 |
| 514.427  | 92.37531 | 72.58578 | 90.75927 |
| 514.9091 | 92.35844 | 72.41624 | 90.6792  |
| 515.3912 | 92.34329 | 72.25027 | 90.58978 |
| 515.8734 | 92.35092 | 72.0914  | 90.49635 |
| 516.3555 | 92.40183 | 71.94321 | 90.40472 |
| 516.8376 | 92.51013 | 71.80896 | 90.3202  |
| 517.3197 | 92.67526 | 71.69108 | 90.24703 |
| 517.8019 | 92.87525 | 71.59064 | 90.18796 |
| 518.284  | 93.06644 | 71.50695 | 90.14403 |
| 518.7661 | 93.19434 | 71.43753 | 90.1146  |
| 519.2482 | 93.21183 | 71.37872 | 90.09761 |
| 519.7303 | 93.09731 | 71.3267  | 90.09031 |
| 520.2125 | 92.86512 | 71.2787  | 90.08995 |

|          |          |          |          |
|----------|----------|----------|----------|
| 520.6946 | 92.56334 | 71.23369 | 90.09444 |
| 521.1767 | 92.25956 | 71.19239 | 90.10253 |
| 521.6588 | 92.02037 | 71.15664 | 90.11369 |
| 522.141  | 91.89062 | 71.12831 | 90.12776 |
| 522.6231 | 91.88175 | 71.10818 | 90.14441 |
| 523.1052 | 91.97215 | 71.09517 | 90.16259 |
| 523.5873 | 92.11935 | 71.08606 | 90.18019 |
| 524.0695 | 92.27437 | 71.07592 | 90.19379 |
| 524.5516 | 92.39426 | 71.05906 | 90.19898 |
| 525.0337 | 92.44788 | 71.03015 | 90.19076 |
| 525.5159 | 92.41724 | 70.98527 | 90.16446 |
| 525.998  | 92.29549 | 70.92242 | 90.11661 |
| 526.4801 | 92.08495 | 70.84168 | 90.04575 |
| 526.9622 | 91.79737 | 70.74477 | 89.95285 |
| 527.4443 | 91.45646 | 70.63434 | 89.84115 |
| 527.9265 | 91.10035 | 70.51317 | 89.7155  |
| 528.4086 | 90.77991 | 70.38343 | 89.58143 |
| 528.8907 | 90.55025 | 70.24622 | 89.44392 |
| 529.3728 | 90.45681 | 70.10142 | 89.30642 |
| 529.855  | 90.52009 | 69.94794 | 89.17032 |
| 530.3371 | 90.72654 | 69.78428 | 89.035   |
| 530.8192 | 91.03148 | 69.60932 | 88.89857 |
| 531.3013 | 91.37352 | 69.42301 | 88.75886 |
| 531.7834 | 91.69282 | 69.22671 | 88.61443 |
| 532.2656 | 91.94701 | 69.02313 | 88.46523 |
| 532.7477 | 92.11868 | 68.81581 | 88.31275 |
| 533.2299 | 92.21405 | 68.60837 | 88.15963 |
| 533.712  | 92.2537  | 68.40372 | 88.00896 |
| 534.1941 | 92.26215 | 68.20346 | 87.86346 |
| 534.6762 | 92.25916 | 68.00766 | 87.72501 |
| 535.1583 | 92.25849 | 67.81507 | 87.59445 |
| 535.6404 | 92.27048 | 67.62365 | 87.47183 |
| 536.1226 | 92.30533 | 67.43137 | 87.35672 |
| 536.6047 | 92.37271 | 67.23683 | 87.24855 |
| 537.0868 | 92.47729 | 67.03969 | 87.14683 |
| 537.569  | 92.61272 | 66.84078 | 87.05115 |
| 538.0511 | 92.75901 | 66.64188 | 86.96114 |
| 538.5332 | 92.88635 | 66.44526 | 86.87627 |
| 539.0153 | 92.96532 | 66.25323 | 86.79584 |
| 539.4974 | 92.97846 | 66.06779 | 86.71903 |
| 539.9796 | 92.92891 | 65.89044 | 86.64533 |
| 540.4617 | 92.84092 | 65.72206 | 86.57467 |
| 540.9438 | 92.7516  | 65.56284 | 86.50769 |
| 541.426  | 92.69688 | 65.41218 | 86.44543 |

541.9081 92.69766 65.26868 86.38899  
542.3902 92.75322 65.13012 86.33905  
542.8723 92.84508 64.99365 86.29541  
543.3544 92.94749 64.85591 86.25686  
543.8365 93.03947 64.71339 86.22121  
544.3187 93.1127 64.56279 86.18576  
544.8008 93.17198 64.40137 86.14779  
545.283 93.22914 64.22716 86.10504  
545.7651 93.29395 64.03896 86.05598  
546.2472 93.36726 63.83617 85.99975  
546.7293 93.4409 63.61862 85.93588  
547.2114 93.50345 63.38632 85.86396  
547.6936 93.54836 63.13954 85.78343  
548.1757 93.58104 62.8788 85.69365  
548.6578 93.61906 62.60521 85.59423  
549.14 93.68689 62.32045 85.48546  
549.6221 93.80548 62.02666 85.36856  
550.1042 93.98334 61.72604 85.24569  
550.5863 94.21236 61.42038 85.11953  
551.0684 94.47001 61.11084 84.99266  
551.5505 94.72669 60.79809 84.867  
552.0327 94.95393 60.48278 84.7434  
552.5148 95.13196 60.16623 84.62169  
552.9969 95.25375 59.85084 84.50093  
553.4791 95.32426 59.5402 84.37999  
553.9612 95.355 59.23863 84.25805  
554.4433 95.35859 58.95036 84.13508  
554.9254 95.34378 58.6785 84.01193  
555.4076 95.31384 58.42432 83.89016  
555.8896 95.26821 58.18695 83.77171  
556.3718 95.20581 57.96364 83.65862  
556.8539 95.12823 57.75051 83.55273  
557.3361 95.04276 57.54358 83.45555  
557.8182 94.96257 57.33951 83.36811  
558.3003 94.90574 57.13609 83.29077  
558.7825 94.89169 56.93217 83.22314  
559.2645 94.93631 56.72735 83.16397  
559.7467 95.0465 56.52163 83.1111  
560.2288 95.21507 56.31523 83.06172  
560.7109 95.4195 56.1086 83.01271  
561.1931 95.6257 55.90249 82.96131  
561.6752 95.79683 55.69805 82.90558  
562.1573 95.90337 55.49672 82.84479  
562.6394 95.93179 55.30008 82.77934

|          |          |          |          |
|----------|----------|----------|----------|
| 563.1216 | 95.8885  | 55.10957 | 82.71038 |
| 563.6037 | 95.79798 | 54.9262  | 82.63917 |
| 564.0858 | 95.69587 | 54.75036 | 82.56648 |
| 564.5679 | 95.61782 | 54.58169 | 82.4921  |
| 565.05   | 95.59011 | 54.4192  | 82.4147  |
| 565.5322 | 95.62347 | 54.26151 | 82.33209 |
| 566.0143 | 95.71406 | 54.10742 | 82.24177 |
| 566.4965 | 95.84818 | 53.95638 | 82.14163 |
| 566.9785 | 96.00926 | 53.80903 | 82.03069 |
| 567.4607 | 96.18217 | 53.66748 | 81.90938 |
| 567.9428 | 96.3558  | 53.53522 | 81.77969 |
| 568.4249 | 96.52232 | 53.41665 | 81.64474 |
| 568.907  | 96.67537 | 53.31623 | 81.50804 |
| 569.3892 | 96.80852 | 53.23751 | 81.37276 |
| 569.8713 | 96.91584 | 53.18245 | 81.24102 |
| 570.3534 | 96.99408 | 53.15115 | 81.11357 |
| 570.8356 | 97.04531 | 53.14216 | 80.98985 |
| 571.3177 | 97.0786  | 53.1531  | 80.86839 |
| 571.7998 | 97.1089  | 53.18151 | 80.7474  |
| 572.2819 | 97.15278 | 53.22547 | 80.62526 |
| 572.764  | 97.2227  | 53.28399 | 80.50099 |
| 573.2462 | 97.32163 | 53.35715 | 80.37439 |
| 573.7283 | 97.44092 | 53.44597 | 80.24604 |
| 574.2104 | 97.56213 | 53.55231 | 80.11718 |
| 574.6925 | 97.66221 | 53.67879 | 79.98956 |
| 575.1747 | 97.72057 | 53.82865 | 79.86533 |
| 575.6568 | 97.72637 | 54.00556 | 79.74682 |
| 576.1389 | 97.6825  | 54.21312 | 79.63639 |
| 576.621  | 97.60503 | 54.45429 | 79.53617 |
| 577.1031 | 97.51781 | 54.73076 | 79.44778 |
| 577.5853 | 97.44479 | 55.04264 | 79.37223 |
| 578.0674 | 97.40322 | 55.38853 | 79.30986 |
| 578.5496 | 97.39993 | 55.76606 | 79.26054 |
| 579.0317 | 97.43056 | 56.17257 | 79.22395 |
| 579.5138 | 97.48202 | 56.6058  | 79.1999  |
| 579.9959 | 97.53699 | 57.06419 | 79.18858 |
| 580.478  | 97.58001 | 57.54682 | 79.19058 |
| 580.9601 | 97.60242 | 58.05302 | 79.20677 |
| 581.4423 | 97.60487 | 58.58194 | 79.23807 |
| 581.9244 | 97.59633 | 59.13214 | 79.28516 |
| 582.4066 | 97.58997 | 59.70157 | 79.3483  |
| 582.8887 | 97.59738 | 60.28769 | 79.42722 |
| 583.3708 | 97.62391 | 60.88781 | 79.52124 |
| 583.8529 | 97.66604 | 61.49938 | 79.62936 |



|          |          |          |          |
|----------|----------|----------|----------|
| 584.335  | 97.71236 | 62.12009 | 79.75046 |
| 584.8171 | 97.74783 | 62.74802 | 79.88354 |
| 585.2993 | 97.75957 | 63.38151 | 80.02786 |
| 585.7814 | 97.7415  | 64.01926 | 80.18303 |
| 586.2635 | 97.69681 | 64.66028 | 80.34909 |
| 586.7457 | 97.63673 | 65.304   | 80.5264  |
| 587.2278 | 97.57662 | 65.95015 | 80.71543 |
| 587.7099 | 97.53091 | 66.59859 | 80.91654 |
| 588.192  | 97.50902 | 67.24901 | 81.12969 |
| 588.6741 | 97.51395 | 67.90073 | 81.35429 |
| 589.1563 | 97.54335 | 68.55269 | 81.5893  |
| 589.6384 | 97.59199 | 69.2036  | 81.83342 |
| 590.1205 | 97.65387 | 69.85238 | 82.08554 |
| 590.6027 | 97.7225  | 70.49836 | 82.34503 |
| 591.0848 | 97.79012 | 71.14138 | 82.61194 |
| 591.5669 | 97.84669 | 71.78154 | 82.88685 |
| 592.049  | 97.88007 | 72.41877 | 83.17047 |
| 592.5311 | 97.87912 | 73.05241 | 83.46315 |
| 593.0133 | 97.83775 | 73.68107 | 83.7644  |
| 593.4954 | 97.75909 | 74.30276 | 84.07281 |
| 593.9775 | 97.65656 | 74.91536 | 84.38618 |
| 594.4597 | 97.5519  | 75.51715 | 84.70197 |
| 594.9418 | 97.46905 | 76.10721 | 85.01781 |
| 595.4239 | 97.42674 | 76.68554 | 85.33187 |
| 595.906  | 97.43212 | 77.25296 | 85.64314 |
| 596.3882 | 97.47916 | 77.81077 | 85.95134 |
| 596.8702 | 97.55267 | 78.36044 | 86.25668 |
| 597.3524 | 97.63618 | 78.9033  | 86.55952 |
| 597.8345 | 97.72049 | 79.44032 | 86.86014 |
| 598.3167 | 97.80894 | 79.9719  | 87.15852 |
| 598.7988 | 97.91653 | 80.49778 | 87.45437 |
| 599.2809 | 98.06297 | 81.01701 | 87.74722 |
| 599.763  | 98.26242 | 81.52809 | 88.03658 |
| 600.2451 | 98.51373 | 82.02935 | 88.32203 |
| 600.7273 | 98.796   | 82.51947 | 88.60334 |
| 601.2094 | 99.07099 | 82.998   | 88.88045 |
| 601.6915 | 99.29176 | 83.46566 | 89.15335 |
| 602.1736 | 99.41483 | 83.92424 | 89.4219  |
| 602.6558 | 99.41285 | 84.37623 | 89.68575 |
| 603.1379 | 99.28233 | 84.82415 | 89.94424 |
| 603.62   | 99.04459 | 85.26999 | 90.19643 |
| 604.1022 | 98.73931 | 85.71481 | 90.44131 |
| 604.5842 | 98.41406 | 86.15876 | 90.67813 |
| 605.0664 | 98.11381 | 86.60126 | 90.9066  |

605. 5485 97. 87331 87. 04129 91. 12705  
606. 0306 97. 71307 87. 47747 91. 34035  
606. 5128 97. 63886 87. 90803 91. 5476  
606. 9949 97. 64336 88. 33079 91. 74974  
607. 477 97. 70966 88. 74322 91. 94739  
607. 9591 97. 81549 89. 14282 92. 14078  
608. 4413 97. 93736 89. 52768 92. 33005  
608. 9234 98. 05396 89. 89693 92. 51551  
609. 4055 98. 14867 90. 25094 92. 69795  
609. 8876 98. 21127 90. 59107 92. 87858  
610. 3698 98. 23831 90. 91903 93. 05873  
610. 8519 98. 23321 91. 23612 93. 23924  
611. 334 98. 20432 91. 5427 93. 41994  
611. 8162 98. 16286 91. 83814 93. 59943  
612. 2983 98. 12035 92. 12123 93. 77517  
612. 7804 98. 08653 92. 39081 93. 94414  
613. 2625 98. 06807 92. 64642 94. 10363  
613. 7446 98. 06844 92. 88841 94. 25201  
614. 2267 98. 08788 93. 11782 94. 38922  
614. 7089 98. 12477 93. 3358 94. 51675  
615. 191 98. 17646 93. 54329 94. 63727  
615. 6731 98. 23991 93. 74081 94. 75388  
616. 1553 98. 31212 93. 92865 94. 86942  
616. 6374 98. 38947 94. 10731 94. 98586  
617. 1195 98. 46719 94. 27777 95. 10408  
617. 6016 98. 53847 94. 4415 95. 22388  
618. 0837 98. 59534 94. 60022 95. 34427  
618. 5659 98. 62972 94. 75534 95. 46391  
619. 048 98. 63618 94. 90761 95. 58156  
619. 5302 98. 61371 95. 05693 95. 69645  
620. 0123 98. 56733 95. 20252 95. 80839  
620. 4944 98. 50775 95. 34316 95. 91776  
620. 9765 98. 44971 95. 47757 96. 02523  
621. 4586 98. 4085 95. 60446 96. 13136  
621. 9407 98. 39633 95. 72256 96. 23629  
622. 4229 98. 41912 95. 83057 96. 33951  
622. 905 98. 47514 95. 92721 96. 4399  
623. 3871 98. 55627 96. 01151 96. 53594  
623. 8693 98. 65104 96. 08318 96. 62612  
624. 3514 98. 74784 96. 14286 96. 70928  
624. 8335 98. 83762 96. 19212 96. 78482  
625. 3156 98. 91425 96. 23312 96. 85277  
625. 7977 98. 97382 96. 26807 96. 91366  
626. 2798 99. 01263 96. 29868 96. 96834

626.762 99.02644 96.32589 97.01775  
627.2441 99.01041 96.34994 97.06286  
627.7263 98.9613 96.37069 97.10459  
628.2084 98.87993 96.38789 97.14375  
628.6905 98.77335 96.40138 97.18101  
629.1726 98.65466 96.4109 97.21673  
629.6547 98.54051 96.4159 97.25091  
630.1368 98.44645 96.41541 97.28312  
630.619 98.38215 96.40823 97.31272  
631.1011 98.34837 96.39341 97.33916  
631.5833 98.33746 96.37087 97.36231  
632.0654 98.33632 96.34168 97.38275  
632.5475 98.33168 96.30804 97.40175  
633.0296 98.31476 96.27267 97.421  
633.5117 98.28457 96.23794 97.44224  
633.9939 98.24809 96.20524 97.46674  
634.476 98.21795 96.1746 97.49505  
634.9581 98.20806 96.14499 97.52693  
635.4402 98.2297 96.11499 97.56154  
635.9224 98.28814 96.08348 97.59774  
636.4045 98.38155 96.0501 97.63431  
636.8866 98.50085 96.01526 97.67024  
637.3687 98.63161 95.97977 97.70479  
637.8508 98.75636 95.94444 97.73756  
638.333 98.858 95.90982 97.76858  
638.8151 98.92295 95.87622 97.79824  
639.2972 98.94392 95.84393 97.82723  
639.7794 98.9216 95.81336 97.85643  
640.2615 98.86481 95.78496 97.8866  
640.7436 98.78873 95.75878 97.91807  
641.2257 98.71149 95.73398 97.95051  
641.7079 98.64961 95.70857 97.98278  
642.1899 98.6138 95.6796 98.01317  
642.6721 98.60674 95.64381 98.03974  
643.1542 98.62299 95.59856 98.06073  
643.6364 98.6516 95.54254 98.0749  
644.1185 98.67937 95.47602 98.08162  
644.6006 98.69424 95.40048 98.08072  
645.0827 98.68803 95.31793 98.07223  
645.5648 98.65717 95.23015 98.0562  
646.047 98.60217 95.13831 98.0326  
646.5291 98.52647 95.0431 98.00162  
647.0112 98.43558 94.94519 97.96385  
647.4933 98.3363 94.84564 97.92059

|          |          |          |          |
|----------|----------|----------|----------|
| 647.9755 | 98.23695 | 94.74603 | 97.87375 |
| 648.4576 | 98.14644 | 94.6481  | 97.82551 |
| 648.9397 | 98.07339 | 94.55309 | 97.77781 |
| 649.4219 | 98.02462 | 94.46113 | 97.73179 |
| 649.904  | 98.00366 | 94.37107 | 97.68745 |
| 650.3861 | 98.01063 | 94.28087 | 97.64372 |
| 650.8682 | 98.04276 | 94.1883  | 97.59878 |
| 651.3503 | 98.09539 | 94.09178 | 97.55063 |
| 651.8325 | 98.16298 | 93.99084 | 97.49765 |
| 652.3146 | 98.23892 | 93.88604 | 97.43889 |
| 652.7968 | 98.31529 | 93.77858 | 97.37426 |
| 653.2788 | 98.38216 | 93.66968 | 97.3044  |
| 653.761  | 98.42803 | 93.56028 | 97.23053 |
| 654.2431 | 98.44149 | 93.45105 | 97.15434 |
| 654.7252 | 98.41447 | 93.3427  | 97.07792 |
| 655.2073 | 98.34549 | 93.23645 | 97.00375 |
| 655.6895 | 98.24235 | 93.13428 | 96.9347  |
| 656.1716 | 98.12209 | 93.03838 | 96.87368 |
| 656.6537 | 98.00754 | 92.95003 | 96.82292 |
| 657.1359 | 97.92155 | 92.86861 | 96.78338 |
| 657.6179 | 97.88104 | 92.79192 | 96.75471 |
| 658.1001 | 97.89305 | 92.7171  | 96.73561 |
| 658.5822 | 97.95418 | 92.64159 | 96.72429 |
| 659.0643 | 98.05322 | 92.56363 | 96.71866 |
| 659.5464 | 98.17555 | 92.48249 | 96.7164  |
| 660.0286 | 98.30768 | 92.39821 | 96.71502 |
| 660.5107 | 98.44    | 92.31123 | 96.71203 |
| 660.9928 | 98.56687 | 92.2219  | 96.70518 |
| 661.475  | 98.68464 | 92.13025 | 96.69293 |
| 661.9571 | 98.78862 | 92.036   | 96.67482 |
| 662.4392 | 98.87202 | 91.9388  | 96.65167 |
| 662.9213 | 98.92677 | 91.83862 | 96.62535 |
| 663.4034 | 98.94697 | 91.7358  | 96.59833 |
| 663.8856 | 98.93187 | 91.631   | 96.57296 |
| 664.3677 | 98.88709 | 91.52479 | 96.55081 |
| 664.8499 | 98.8232  | 91.41741 | 96.53229 |
| 665.332  | 98.7528  | 91.30864 | 96.5167  |
| 665.8141 | 98.68781 | 91.19813 | 96.50264 |
| 666.2962 | 98.63784 | 91.08585 | 96.48871 |
| 666.7783 | 98.60868 | 90.97245 | 96.47406 |
| 667.2605 | 98.60032 | 90.8594  | 96.45865 |
| 667.7426 | 98.60457 | 90.74855 | 96.44312 |
| 668.2247 | 98.6072  | 90.64157 | 96.42839 |
| 668.7068 | 98.59661 | 90.53927 | 96.41515 |

|          |          |          |          |
|----------|----------|----------|----------|
| 669.189  | 98.5717  | 90.4413  | 96.4036  |
| 669.6711 | 98.53977 | 90.34633 | 96.39335 |
| 670.1532 | 98.50948 | 90.25255 | 96.38369 |
| 670.6353 | 98.48699 | 90.15822 | 96.37392 |
| 671.1174 | 98.47623 | 90.06212 | 96.36357 |
| 671.5996 | 98.47977 | 89.96353 | 96.35248 |
| 672.0817 | 98.49921 | 89.86204 | 96.34066 |
| 672.5638 | 98.53438 | 89.75723 | 96.32805 |
| 673.046  | 98.58256 | 89.64855 | 96.31435 |
| 673.5281 | 98.6379  | 89.53549 | 96.29901 |
| 674.0102 | 98.69236 | 89.41789 | 96.28136 |
| 674.4923 | 98.73753 | 89.29625 | 96.26078 |
| 674.9745 | 98.76751 | 89.17185 | 96.23692 |
| 675.4565 | 98.78091 | 89.04649 | 96.20975 |
| 675.9387 | 98.78165 | 88.922   | 96.1795  |
| 676.4208 | 98.77827 | 88.79983 | 96.14664 |
| 676.903  | 98.78116 | 88.68084 | 96.1119  |
| 677.3851 | 98.79879 | 88.5654  | 96.07626 |
| 677.8672 | 98.83481 | 88.45374 | 96.04111 |
| 678.3493 | 98.88676 | 88.34617 | 96.0081  |
| 678.8314 | 98.94723 | 88.24318 | 95.97902 |
| 679.3136 | 99.00644 | 88.14517 | 95.95526 |
| 679.7957 | 99.05572 | 88.05181 | 95.93739 |
| 680.2778 | 99.0901  | 87.96146 | 95.92456 |
| 680.7599 | 99.10967 | 87.87122 | 95.91456 |
| 681.2421 | 99.11825 | 87.77799 | 95.90452 |
| 681.7242 | 99.12132 | 87.67971 | 95.89187 |
| 682.2063 | 99.12309 | 87.57581 | 95.87495 |
| 682.6885 | 99.12522 | 87.46693 | 95.85315 |
| 683.1705 | 99.12652 | 87.35441 | 95.82665 |
| 683.6527 | 99.12411 | 87.23972 | 95.79619 |
| 684.1348 | 99.11514 | 87.12408 | 95.76279 |
| 684.6169 | 99.09771 | 87.00823 | 95.72762 |
| 685.0991 | 99.07168 | 86.89242 | 95.69186 |
| 685.5812 | 99.03796 | 86.77671 | 95.65678 |
| 686.0634 | 98.99825 | 86.66136 | 95.62365 |
| 686.5454 | 98.95487 | 86.54707 | 95.59372 |
| 687.0276 | 98.91103 | 86.43493 | 95.56805 |
| 687.5096 | 98.87127 | 86.32612 | 95.54729 |
| 687.9918 | 98.84109 | 86.22149 | 95.53158 |
| 688.4739 | 98.82571 | 86.1212  | 95.52054 |
| 688.9561 | 98.82792 | 86.02472 | 95.51337 |
| 689.4382 | 98.84643 | 85.93105 | 95.50908 |
| 689.9203 | 98.87502 | 85.83903 | 95.50665 |

|          |          |          |          |
|----------|----------|----------|----------|
| 690.4025 | 98.90405 | 85.74772 | 95.50514 |
| 690.8845 | 98.92313 | 85.6564  | 95.50365 |
| 691.3667 | 98.92488 | 85.56446 | 95.50122 |
| 691.8488 | 98.90847 | 85.47124 | 95.4968  |
| 692.3309 | 98.88087 | 85.37594 | 95.48942 |
| 692.813  | 98.85514 | 85.27773 | 95.47839 |
| 693.2952 | 98.84656 | 85.17606 | 95.46353 |
| 693.7773 | 98.86727 | 85.07093 | 95.44535 |
| 694.2594 | 98.92204 | 84.96297 | 95.42486 |
| 694.7416 | 99.00591 | 84.85329 | 95.40329 |
| 695.2236 | 99.10518 | 84.74313 | 95.38162 |
| 695.7058 | 99.20096 | 84.63346 | 95.36023 |
| 696.1879 | 99.27462 | 84.52469 | 95.3387  |
| 696.67   | 99.31306 | 84.41673 | 95.31596 |
| 697.1522 | 99.31179 | 84.30922 | 95.29065 |
| 697.6343 | 99.2752  | 84.20192 | 95.26156 |
| 698.1165 | 99.21424 | 84.09493 | 95.22804 |
| 698.5985 | 99.14276 | 83.98882 | 95.19016 |
| 699.0807 | 99.07425 | 83.88437 | 95.14873 |
| 699.5628 | 99.01901 | 83.78235 | 95.10509 |
| 700.0449 | 98.98315 | 83.6832  | 95.06089 |
| 700.527  | 98.96856 | 83.587   | 95.01784 |
| 701.0092 | 98.97418 | 83.49348 | 94.97753 |
| 701.4913 | 98.99706 | 83.40223 | 94.94117 |
| 701.9734 | 99.03317 | 83.31277 | 94.90942 |
| 702.4556 | 99.07774 | 83.22457 | 94.88214 |
| 702.9377 | 99.12527 | 83.13699 | 94.85838 |
| 703.4198 | 99.16996 | 83.04912 | 94.83638 |
| 703.9019 | 99.20621 | 82.95994 | 94.81404 |
| 704.384  | 99.22977 | 82.86843 | 94.78932 |
| 704.8662 | 99.2383  | 82.77392 | 94.76084 |
| 705.3483 | 99.23185 | 82.67631 | 94.72821 |
| 705.8304 | 99.21246 | 82.57613 | 94.69209 |
| 706.3125 | 99.18344 | 82.47436 | 94.65388 |
| 706.7947 | 99.14867 | 82.37208 | 94.61528 |
| 707.2768 | 99.11198 | 82.27004 | 94.57776 |
| 707.7589 | 99.07711 | 82.16842 | 94.54222 |
| 708.241  | 99.04755 | 82.06688 | 94.50891 |
| 708.7231 | 99.02697 | 81.96481 | 94.47764 |
| 709.2053 | 99.01885 | 81.86172 | 94.44814 |
| 709.6874 | 99.02602 | 81.75757 | 94.42027 |
| 710.1696 | 99.0499  | 81.65284 | 94.39412 |
| 710.6517 | 99.08939 | 81.54843 | 94.36991 |
| 711.1338 | 99.14079 | 81.44529 | 94.3477  |

711.6159 99.19844 81.3441 94.32722  
712.098 99.25597 81.24509 94.30779  
712.5802 99.30819 81.14794 94.28846  
713.0623 99.35223 81.05191 94.26821  
713.5444 99.38763 80.95604 94.24627  
714.0265 99.41565 80.85929 94.22223  
714.5087 99.43768 80.76071 94.19615  
714.9908 99.45412 80.65955 94.16842  
715.4729 99.46374 80.55531 94.13968  
715.955 99.46417 80.44782 94.11063  
716.4371 99.45342 80.33733 94.08197  
716.9193 99.43095 80.22441 94.05426  
717.4014 99.39875 80.10992 94.02783  
717.8835 99.36092 79.99478 94.00271  
718.3657 99.32263 79.87978 93.9785  
718.8478 99.28829 79.7655 93.95442  
719.3299 99.26012 79.65231 93.92949  
719.812 99.23775 79.54049 93.90284  
720.2942 99.21871 79.4305 93.874  
720.7762 99.2003 79.32302 93.84319  
721.2584 99.18105 79.21896 93.81136  
721.7405 99.16167 79.11917 93.77997  
722.2227 99.1444 79.02409 93.7506  
722.7048 99.13174 78.93351 93.72455  
723.1869 99.12483 78.84643 93.7025  
723.6691 99.12287 78.76123 93.68444  
724.1511 99.12347 78.67607 93.66981  
724.6333 99.12431 78.5893 93.65773  
725.1154 99.12498 78.4998 93.64734  
725.5975 99.12794 78.40717 93.63791  
726.0797 99.13812 78.31161 93.62881  
726.5618 99.16097 78.21371 93.61945  
727.0439 99.19961 78.1142 93.6092  
727.526 99.25243 78.01377 93.59737  
728.0082 99.31242 77.91298 93.58337  
728.4902 99.36861 77.81225 93.56695  
728.9724 99.4091 77.71188 93.54829  
729.4545 99.42474 77.612 93.52807  
729.9366 99.41236 77.51251 93.50731  
730.4188 99.37587 77.41307 93.4871  
730.9009 99.32522 77.31316 93.4683  
731.3831 99.27352 77.21219 93.45138  
731.8651 99.2334 77.10979 93.43631  
732.3473 99.2144 77.0059 93.42264

|          |          |          |          |
|----------|----------|----------|----------|
| 732.8293 | 99.22116 | 76.90089 | 93.40966 |
| 733.3115 | 99.25356 | 76.79536 | 93.39653 |
| 733.7936 | 99.30765 | 76.68995 | 93.38234 |
| 734.2758 | 99.37666 | 76.58499 | 93.36621 |
| 734.7579 | 99.45242 | 76.4803  | 93.34726 |
| 735.24   | 99.52618 | 76.3752  | 93.32477 |
| 735.7222 | 99.5895  | 76.26867 | 93.29827 |
| 736.2042 | 99.63493 | 76.15965 | 93.2677  |
| 736.6864 | 99.65708 | 76.04739 | 93.23349 |
| 737.1685 | 99.65364 | 75.93168 | 93.19654 |
| 737.6506 | 99.62613 | 75.81289 | 93.15805 |
| 738.1328 | 99.57969 | 75.69194 | 93.11929 |
| 738.6149 | 99.52229 | 75.57009 | 93.08136 |
| 739.097  | 99.46261 | 75.4487  | 93.04498 |
| 739.5791 | 99.40813 | 75.32906 | 93.01041 |
| 740.0613 | 99.36369 | 75.21222 | 92.97753 |
| 740.5434 | 99.331   | 75.0989  | 92.94593 |
| 741.0255 | 99.30926 | 74.98946 | 92.91503 |
| 741.5076 | 99.29616 | 74.88398 | 92.88418 |
| 741.9897 | 99.289   | 74.78227 | 92.85274 |
| 742.4719 | 99.28574 | 74.68407 | 92.82015 |
| 742.954  | 99.2849  | 74.58908 | 92.78601 |
| 743.4362 | 99.2858  | 74.49714 | 92.75013 |
| 743.9182 | 99.28809 | 74.40814 | 92.71263 |
| 744.4004 | 99.29188 | 74.32195 | 92.67388 |
| 744.8825 | 99.29774 | 74.23827 | 92.63443 |
| 745.3646 | 99.30688 | 74.15646 | 92.59484 |
| 745.8467 | 99.32095 | 74.07547 | 92.55555 |
| 746.3289 | 99.34155 | 73.994   | 92.51676 |
| 746.811  | 99.36932 | 73.91067 | 92.47847 |
| 747.2931 | 99.40332 | 73.82438 | 92.44055 |
| 747.7753 | 99.44075 | 73.73455 | 92.40286 |
| 748.2574 | 99.47746 | 73.64127 | 92.36539 |
| 748.7395 | 99.50911 | 73.54518 | 92.32819 |
| 749.2216 | 99.53239 | 73.44728 | 92.29131 |
| 749.7037 | 99.54602 | 73.34864 | 92.25471 |
| 750.1859 | 99.55099 | 73.25015 | 92.21815 |
| 750.668  | 99.54943 | 73.15233 | 92.18123 |
| 751.1501 | 99.5434  | 73.05529 | 92.14356 |
| 751.6322 | 99.53368 | 72.95885 | 92.10494 |
| 752.1144 | 99.51929 | 72.86258 | 92.06551 |
| 752.5965 | 99.49855 | 72.76595 | 92.02576 |
| 753.0786 | 99.47038 | 72.66839 | 91.98644 |
| 753.5608 | 99.43613 | 72.56934 | 91.94829 |



|          |          |          |          |
|----------|----------|----------|----------|
| 754.0428 | 99.40048 | 72.46835 | 91.91183 |
| 754.525  | 99.37051 | 72.36517 | 91.87717 |
| 755.0071 | 99.35424 | 72.2598  | 91.84404 |
| 755.4893 | 99.35797 | 72.1525  | 91.81192 |
| 755.9714 | 99.38425 | 72.04377 | 91.78022 |
| 756.4535 | 99.4309  | 71.93418 | 91.74852 |
| 756.9356 | 99.49157 | 71.82419 | 91.71663 |
| 757.4177 | 99.55746 | 71.71404 | 91.68455 |
| 757.8999 | 99.61984 | 71.60365 | 91.65248 |
| 758.382  | 99.67216 | 71.49274 | 91.62059 |
| 758.8641 | 99.71088 | 71.38098 | 91.58906 |
| 759.3463 | 99.73514 | 71.26821 | 91.55801 |
| 759.8284 | 99.74564 | 71.15461 | 91.52757 |
| 760.3105 | 99.74334 | 71.04071 | 91.49792 |
| 760.7926 | 99.72873 | 70.92733 | 91.46931 |
| 761.2748 | 99.70225 | 70.81534 | 91.442   |
| 761.7568 | 99.66511 | 70.70549 | 91.4162  |
| 762.239  | 99.62027 | 70.59814 | 91.39198 |
| 762.7211 | 99.57272 | 70.49324 | 91.3692  |
| 763.2032 | 99.52893 | 70.39034 | 91.34751 |
| 763.6854 | 99.49522 | 70.28869 | 91.32646 |
| 764.1675 | 99.47612 | 70.18746 | 91.30553 |
| 764.6496 | 99.47269 | 70.08584 | 91.28425 |
| 765.1317 | 99.48221 | 69.98322 | 91.26225 |
| 765.6139 | 99.49877 | 69.87922 | 91.23926 |
| 766.0959 | 99.51555 | 69.7737  | 91.21515 |
| 766.5781 | 99.52679 | 69.66671 | 91.18984 |
| 767.0602 | 99.52982 | 69.55837 | 91.16331 |
| 767.5424 | 99.52574 | 69.44887 | 91.13557 |
| 768.0245 | 99.51858 | 69.3383  | 91.10659 |
| 768.5066 | 99.51353 | 69.22672 | 91.07632 |
| 768.9888 | 99.5148  | 69.11416 | 91.04467 |
| 769.4708 | 99.52364 | 69.00064 | 91.01152 |
| 769.953  | 99.53768 | 68.8863  | 90.97678 |
| 770.4351 | 99.55164 | 68.77134 | 90.9404  |
| 770.9172 | 99.55896 | 68.65609 | 90.90238 |
| 771.3994 | 99.55418 | 68.54088 | 90.86283 |
| 771.8815 | 99.53466 | 68.42598 | 90.82192 |
| 772.3636 | 99.50176 | 68.31151 | 90.77988 |
| 772.8457 | 99.46049 | 68.19741 | 90.73694 |
| 773.3279 | 99.41798 | 68.08347 | 90.69338 |
| 773.8099 | 99.38132 | 67.96939 | 90.64945 |
| 774.2921 | 99.35558 | 67.85487 | 90.60544 |
| 774.7742 | 99.34254 | 67.73967 | 90.56164 |

|          |          |          |          |
|----------|----------|----------|----------|
| 775.2563 | 99.34058 | 67.62365 | 90.51831 |
| 775.7385 | 99.34547 | 67.50679 | 90.47564 |
| 776.2206 | 99.35202 | 67.38913 | 90.43373 |
| 776.7028 | 99.35571 | 67.2708  | 90.39254 |
| 777.1848 | 99.35379 | 67.15198 | 90.35193 |
| 777.667  | 99.34594 | 67.03288 | 90.31169 |
| 778.1491 | 99.3336  | 66.91374 | 90.27163 |
| 778.6312 | 99.31928 | 66.79479 | 90.2316  |
| 779.1133 | 99.30536 | 66.67619 | 90.1915  |
| 779.5955 | 99.2935  | 66.55792 | 90.15122 |
| 780.0776 | 99.28443 | 66.43983 | 90.11059 |
| 780.5597 | 99.27826 | 66.3216  | 90.06933 |
| 781.0419 | 99.27511 | 66.20281 | 90.02709 |
| 781.5239 | 99.27541 | 66.08312 | 89.98353 |
| 782.0061 | 99.27998 | 65.96232 | 89.93846 |
| 782.4882 | 99.28944 | 65.84046 | 89.89192 |
| 782.9703 | 99.30347 | 65.71777 | 89.84429 |
| 783.4525 | 99.3201  | 65.59468 | 89.7962  |
| 783.9346 | 99.33554 | 65.47165 | 89.74845 |
| 784.4167 | 99.34489 | 65.34906 | 89.70185 |
| 784.8988 | 99.34356 | 65.22715 | 89.65703 |
| 785.381  | 99.32908 | 65.10599 | 89.6144  |
| 785.8631 | 99.30241 | 64.98552 | 89.57408 |
| 786.3452 | 99.26844 | 64.86561 | 89.536   |
| 786.8273 | 99.23512 | 64.74607 | 89.4999  |
| 787.3094 | 99.21134 | 64.62672 | 89.46539 |
| 787.7916 | 99.20445 | 64.50733 | 89.43197 |
| 788.2737 | 99.218   | 64.38761 | 89.39907 |
| 788.7559 | 99.25034 | 64.2672  | 89.36606 |
| 789.238  | 99.29523 | 64.14568 | 89.33232 |
| 789.7201 | 99.34365 | 64.02265 | 89.29737 |
| 790.2022 | 99.38667 | 63.89784 | 89.26095 |
| 790.6843 | 99.41805 | 63.77118 | 89.22307 |
| 791.1665 | 99.43586 | 63.64293 | 89.18399 |
| 791.6486 | 99.44258 | 63.51362 | 89.14415 |
| 792.1307 | 99.44389 | 63.384   | 89.104   |
| 792.6128 | 99.44627 | 63.25487 | 89.06385 |
| 793.095  | 99.45465 | 63.12686 | 89.02382 |
| 793.5771 | 99.47102 | 63.00028 | 88.98383 |
| 794.0592 | 99.49392 | 62.87502 | 88.94368 |
| 794.5413 | 99.51942 | 62.7506  | 88.9032  |
| 795.0234 | 99.54271 | 62.62629 | 88.86231 |
| 795.5056 | 99.55976 | 62.50127 | 88.82109 |
| 795.9877 | 99.56853 | 62.37488 | 88.77977 |

|          |          |          |          |
|----------|----------|----------|----------|
| 796.4698 | 99.56916 | 62.24667 | 88.73866 |
| 796.952  | 99.56367 | 62.11645 | 88.69804 |
| 797.4341 | 99.55475 | 61.98425 | 88.65811 |
| 797.9162 | 99.54487 | 61.85016 | 88.61896 |
| 798.3983 | 99.53552 | 61.71432 | 88.58057 |
| 798.8805 | 99.52718 | 61.57685 | 88.54284 |
| 799.3625 | 99.51937 | 61.43792 | 88.50568 |
| 799.8447 | 99.5112  | 61.2978  | 88.46894 |
| 800.3268 | 99.50172 | 61.15693 | 88.43248 |
| 800.809  | 99.49022 | 61.01579 | 88.3961  |
| 801.2911 | 99.47657 | 60.8749  | 88.35953 |
| 801.7732 | 99.46119 | 60.7346  | 88.32242 |
| 802.2553 | 99.44505 | 60.59498 | 88.28433 |
| 802.7374 | 99.42966 | 60.45585 | 88.24477 |
| 803.2196 | 99.41661 | 60.31683 | 88.20329 |
| 803.7017 | 99.40702 | 60.17748 | 88.15951 |
| 804.1838 | 99.40115 | 60.03748 | 88.11323 |
| 804.666  | 99.39783 | 59.89674 | 88.06448 |
| 805.1481 | 99.39492 | 59.75538 | 88.01361 |
| 805.6302 | 99.38982 | 59.61365 | 87.96119 |
| 806.1123 | 99.38048 | 59.47187 | 87.90802 |
| 806.5945 | 99.36653 | 59.33026 | 87.85499 |
| 807.0765 | 99.34946 | 59.18894 | 87.80296 |
| 807.5587 | 99.33248 | 59.04796 | 87.75258 |
| 808.0408 | 99.31911 | 58.90732 | 87.70425 |
| 808.5229 | 99.31174 | 58.76706 | 87.65803 |
| 809.0051 | 99.31036 | 58.62721 | 87.61368 |
| 809.4872 | 99.31232 | 58.48779 | 87.57072 |
| 809.9694 | 99.31303 | 58.3487  | 87.52855 |
| 810.4514 | 99.30794 | 58.20974 | 87.48657 |
| 810.9336 | 99.29433 | 58.07051 | 87.44422 |
| 811.4156 | 99.27297 | 57.93053 | 87.40108 |
| 811.8978 | 99.24809 | 57.78921 | 87.3569  |
| 812.3799 | 99.22601 | 57.64604 | 87.31155 |
| 812.8621 | 99.21309 | 57.50055 | 87.26509 |
| 813.3442 | 99.21327 | 57.35241 | 87.21767 |
| 813.8263 | 99.22691 | 57.20147 | 87.1695  |
| 814.3085 | 99.25073 | 57.04777 | 87.12079 |
| 814.7905 | 99.27945 | 56.89155 | 87.07164 |
| 815.2727 | 99.30782 | 56.73325 | 87.02204 |
| 815.7548 | 99.3327  | 56.5734  | 86.97179 |
| 816.2369 | 99.35395 | 56.41251 | 86.92057 |
| 816.7191 | 99.37379 | 56.25096 | 86.86799 |
| 817.2012 | 99.3951  | 56.08892 | 86.81368 |

|          |          |          |          |
|----------|----------|----------|----------|
| 817.6833 | 99.41927 | 55.92631 | 86.75744 |
| 818.1654 | 99.44461 | 55.76299 | 86.69927 |
| 818.6476 | 99.46635 | 55.59882 | 86.63941 |
| 819.1296 | 99.47794 | 55.43385 | 86.57829 |
| 819.6118 | 99.47347 | 55.26828 | 86.51645 |
| 820.0939 | 99.45006 | 55.10248 | 86.45441 |
| 820.576  | 99.4094  | 54.93675 | 86.39258 |
| 821.0582 | 99.35774 | 54.77125 | 86.33121 |
| 821.5403 | 99.30442 | 54.60588 | 86.2704  |
| 822.0225 | 99.25941 | 54.44038 | 86.2101  |
| 822.5045 | 99.23091 | 54.27449 | 86.1502  |
| 822.9867 | 99.22324 | 54.10812 | 86.09058 |
| 823.4688 | 99.23593 | 53.94144 | 86.03109 |
| 823.9509 | 99.26408 | 53.77485 | 85.9716  |
| 824.433  | 99.2998  | 53.60884 | 85.91199 |
| 824.9152 | 99.33395 | 53.44371 | 85.85209 |
| 825.3973 | 99.35817 | 53.27945 | 85.79173 |
| 825.8794 | 99.36645 | 53.11573 | 85.73078 |
| 826.3616 | 99.35605 | 52.95195 | 85.66917 |
| 826.8437 | 99.32809 | 52.78755 | 85.60693 |
| 827.3258 | 99.28703 | 52.62208 | 85.5442  |
| 827.8079 | 99.2398  | 52.45535 | 85.48122 |
| 828.29   | 99.19395 | 52.28736 | 85.41826 |
| 828.7722 | 99.1563  | 52.11816 | 85.35558 |
| 829.2543 | 99.1313  | 51.94775 | 85.29335 |
| 829.7365 | 99.12038 | 51.776   | 85.23164 |
| 830.2185 | 99.12199 | 51.60278 | 85.17043 |
| 830.7007 | 99.1325  | 51.42804 | 85.10959 |
| 831.1828 | 99.14747 | 51.25192 | 85.04898 |
| 831.6649 | 99.16307 | 51.07475 | 84.9884  |
| 832.147  | 99.17686 | 50.89691 | 84.9277  |
| 832.6292 | 99.18797 | 50.71866 | 84.86677 |
| 833.1113 | 99.19643 | 50.53999 | 84.80556 |
| 833.5934 | 99.20236 | 50.3606  | 84.74409 |
| 834.0756 | 99.20544 | 50.18001 | 84.68246 |
| 834.5577 | 99.20479 | 49.99771 | 84.62081 |
| 835.0398 | 99.19971 | 49.81339 | 84.55924 |
| 835.5219 | 99.19049 | 49.62694 | 84.49776 |
| 836.004  | 99.1792  | 49.43845 | 84.4362  |
| 836.4862 | 99.16946 | 49.24808 | 84.3742  |
| 836.9683 | 99.16571 | 49.05591 | 84.31123 |
| 837.4504 | 99.17169 | 48.86194 | 84.24674 |
| 837.9325 | 99.18903 | 48.66616 | 84.18022 |
| 838.4147 | 99.21645 | 48.46867 | 84.11135 |

838. 8968 99. 24965 48. 26976 84. 04008  
839. 3789 99. 28275 48. 06995 83. 96657  
839. 861 99. 3097 47. 86983 83. 89114  
840. 3431 99. 32627 47. 66992 83. 81409  
840. 8253 99. 33073 47. 47052 83. 73565  
841. 3074 99. 32421 47. 27167 83. 65588  
841. 7896 99. 30997 47. 07324 83. 57475  
842. 2717 99. 29228 46. 87511 83. 49219  
842. 7538 99. 27539 46. 6772 83. 40819  
843. 2359 99. 2626 46. 47959 83. 32281  
843. 718 99. 25596 46. 28234 83. 23624  
844. 2002 99. 25632 46. 08545 83. 14869  
844. 6823 99. 26353 45. 88872 83. 06036  
845. 1644 99. 27665 45. 69182 82. 97143  
845. 6465 99. 29398 45. 4944 82. 88203  
846. 1287 99. 31323 45. 29625 82. 79231  
846. 6108 99. 33163 45. 09737 82. 70243  
847. 0929 99. 34619 44. 89794 82. 6126  
847. 5751 99. 35421 44. 69818 82. 52304  
848. 0571 99. 35357 44. 49817 82. 43388  
848. 5393 99. 34316 44. 29781 82. 34512  
849. 0214 99. 32301 44. 09683 82. 25662  
849. 5035 99. 29435 43. 89505 82. 16809  
849. 9857 99. 25961 43. 69256 82. 07921  
850. 4678 99. 22213 43. 4898 81. 98969  
850. 9499 99. 18575 43. 28746 81. 89935  
851. 432 99. 15422 43. 08624 81. 80808  
851. 9142 99. 13059 42. 88656 81. 71586  
852. 3962 99. 11633 42. 6884 81. 62267  
852. 8784 99. 11102 42. 49136 81. 52848  
853. 3605 99. 1123 42. 29489 81. 43325  
853. 8427 99. 11668 42. 09868 81. 33697  
854. 3248 99. 12062 41. 90286 81. 23968  
854. 8069 99. 12196 41. 70802 81. 14151  
855. 2891 99. 12092 41. 51499 81. 04264  
855. 7711 99. 11996 41. 32456 80. 94322  
856. 2533 99. 12298 41. 13716 80. 84333  
856. 7354 99. 13351 40. 95282 80. 74291  
857. 2175 99. 15304 40. 77128 80. 6418  
857. 6996 99. 18007 40. 59223 80. 53978  
858. 1818 99. 21046 40. 41557 80. 43664  
858. 6639 99. 23879 40. 24141 80. 33221  
859. 146 99. 26072 40. 07001 80. 22641  
859. 6282 99. 27471 39. 90152 80. 11918

|          |          |          |          |
|----------|----------|----------|----------|
| 860.1102 | 99.28278 | 39.73591 | 80.01047 |
| 860.5924 | 99.28976 | 39.57291 | 79.90026 |
| 861.0745 | 99.30112 | 39.41229 | 79.78856 |
| 861.5566 | 99.32079 | 39.25405 | 79.67549 |
| 862.0388 | 99.34911 | 39.09869 | 79.5613  |
| 862.5209 | 99.38246 | 38.94709 | 79.44636 |
| 863.0031 | 99.41425 | 38.80033 | 79.33109 |
| 863.4851 | 99.43708 | 38.6593  | 79.21586 |
| 863.9673 | 99.44498 | 38.52439 | 79.10086 |
| 864.4494 | 99.4352  | 38.39544 | 78.98612 |
| 864.9315 | 99.40849 | 38.27185 | 78.87151 |
| 865.4136 | 99.36844 | 38.15291 | 78.75683 |
| 865.8958 | 99.32016 | 38.03811 | 78.64199 |
| 866.3779 | 99.26866 | 37.92727 | 78.52701 |
| 866.86   | 99.21793 | 37.82053 | 78.41212 |
| 867.3422 | 99.17069 | 37.71809 | 78.29766 |
| 867.8242 | 99.12881 | 37.62006 | 78.184   |
| 868.3064 | 99.09375 | 37.52636 | 78.07148 |
| 868.7885 | 99.06664 | 37.43672 | 77.96033 |
| 869.2706 | 99.04825 | 37.35093 | 77.85066 |
| 869.7527 | 99.03835 | 37.26894 | 77.74252 |
| 870.2349 | 99.03574 | 37.1909  | 77.63583 |
| 870.717  | 99.03813 | 37.11715 | 77.53045 |
| 871.1991 | 99.04314 | 37.04798 | 77.42616 |
| 871.6813 | 99.04881 | 36.98361 | 77.32267 |
| 872.1634 | 99.05433 | 36.92412 | 77.21966 |
| 872.6455 | 99.06008 | 36.86963 | 77.11691 |
| 873.1276 | 99.06686 | 36.82036 | 77.01434 |
| 873.6097 | 99.07536 | 36.77671 | 76.91213 |
| 874.0919 | 99.08503 | 36.73915 | 76.81066 |
| 874.574  | 99.09414 | 36.70799 | 76.71052 |
| 875.0562 | 99.10018 | 36.68317 | 76.61235 |
| 875.5382 | 99.101   | 36.66426 | 76.51672 |
| 876.0204 | 99.09591 | 36.65056 | 76.42409 |
| 876.5025 | 99.08635 | 36.64146 | 76.33479 |
| 876.9846 | 99.07577 | 36.63672 | 76.24903 |
| 877.4668 | 99.06881 | 36.63665 | 76.16697 |
| 877.9489 | 99.06972 | 36.642   | 76.08871 |
| 878.431  | 99.08093 | 36.65362 | 76.01433 |
| 878.9131 | 99.1023  | 36.67208 | 75.9438  |
| 879.3953 | 99.13093 | 36.69734 | 75.87702 |
| 879.8774 | 99.16211 | 36.72882 | 75.81381 |
| 880.3595 | 99.19047 | 36.76554 | 75.75399 |
| 880.8416 | 99.21152 | 36.8066  | 75.69742 |

|          |          |          |          |
|----------|----------|----------|----------|
| 881.3237 | 99.22283 | 36.85139 | 75.6441  |
| 881.8059 | 99.22442 | 36.89978 | 75.59416 |
| 882.288  | 99.21867 | 36.95197 | 75.5478  |
| 882.7701 | 99.2094  | 37.00828 | 75.50525 |
| 883.2523 | 99.20078 | 37.06892 | 75.46665 |
| 883.7344 | 99.19617 | 37.13395 | 75.43207 |
| 884.2165 | 99.19733 | 37.20341 | 75.40148 |
| 884.6986 | 99.20399 | 37.27748 | 75.37482 |
| 885.1808 | 99.2141  | 37.35658 | 75.35205 |
| 885.6628 | 99.22449 | 37.44126 | 75.33316 |
| 886.145  | 99.23184 | 37.53199 | 75.31813 |
| 886.6271 | 99.23383 | 37.62882 | 75.30695 |
| 887.1093 | 99.22963 | 37.73122 | 75.29951 |
| 887.5914 | 99.22018 | 37.83815 | 75.29566 |
| 888.0735 | 99.20793 | 37.9483  | 75.29524 |
| 888.5556 | 99.19579 | 38.06055 | 75.29813 |
| 889.0377 | 99.18641 | 38.17421 | 75.30426 |
| 889.5199 | 99.18119 | 38.28922 | 75.31365 |
| 890.002  | 99.17996 | 38.40592 | 75.32637 |
| 890.4841 | 99.18126 | 38.52482 | 75.34246 |
| 890.9662 | 99.18288 | 38.64633 | 75.36192 |
| 891.4484 | 99.18263 | 38.77056 | 75.38467 |
| 891.9305 | 99.17918 | 38.89742 | 75.41056 |
| 892.4126 | 99.17244 | 39.02673 | 75.43938 |
| 892.8948 | 99.16353 | 39.15838 | 75.47085 |
| 893.3768 | 99.15457 | 39.29232 | 75.5046  |
| 893.859  | 99.14796 | 39.42846 | 75.5402  |
| 894.3411 | 99.1459  | 39.56654 | 75.57714 |
| 894.8232 | 99.14991 | 39.70603 | 75.61495 |
| 895.3054 | 99.16052 | 39.84618 | 75.6533  |
| 895.7875 | 99.17712 | 39.98621 | 75.69211 |
| 896.2697 | 99.19794 | 40.12557 | 75.73157 |
| 896.7517 | 99.22031 | 40.26409 | 75.77218 |
| 897.2339 | 99.24103 | 40.40191 | 75.8145  |
| 897.7159 | 99.25686 | 40.5394  | 75.85906 |
| 898.1981 | 99.2653  | 40.67683 | 75.90614 |
| 898.6802 | 99.26506 | 40.81426 | 75.95572 |
| 899.1624 | 99.2565  | 40.95152 | 76.00756 |
| 899.6445 | 99.24168 | 41.08834 | 76.06131 |
| 900.1266 | 99.22389 | 41.22457 | 76.11668 |
| 900.6088 | 99.20702 | 41.36024 | 76.17354 |
| 901.0908 | 99.19432 | 41.49554 | 76.23194 |
| 901.573  | 99.18784 | 41.6306  | 76.29201 |
| 902.0551 | 99.18774 | 41.76535 | 76.35383 |

|          |          |          |          |
|----------|----------|----------|----------|
| 902.5372 | 99.19247 | 41.89933 | 76.41739 |
| 903.0193 | 99.19925 | 42.03183 | 76.48246 |
| 903.5015 | 99.20493 | 42.16215 | 76.54873 |
| 903.9836 | 99.20689 | 42.28984 | 76.61584 |
| 904.4657 | 99.20364 | 42.41493 | 76.68347 |
| 904.9479 | 99.19509 | 42.5379  | 76.75135 |
| 905.4299 | 99.18236 | 42.65938 | 76.81925 |
| 905.9121 | 99.16734 | 42.7799  | 76.88696 |
| 906.3942 | 99.15221 | 42.8996  | 76.95422 |
| 906.8763 | 99.13905 | 43.01819 | 77.02075 |
| 907.3585 | 99.12975 | 43.13511 | 77.08634 |
| 907.8406 | 99.12575 | 43.24977 | 77.15086 |
| 908.3228 | 99.12819 | 43.36181 | 77.21431 |
| 908.8048 | 99.13749 | 43.47117 | 77.27681 |
| 909.287  | 99.15318 | 43.57798 | 77.33851 |
| 909.7691 | 99.1735  | 43.68236 | 77.39952 |
| 910.2512 | 99.19533 | 43.78425 | 77.45989 |
| 910.7333 | 99.21452 | 43.88339 | 77.5196  |
| 911.2155 | 99.22661 | 43.97941 | 77.5786  |
| 911.6976 | 99.2281  | 44.07205 | 77.63687 |
| 912.1797 | 99.21758 | 44.16132 | 77.69447 |
| 912.6619 | 99.19649 | 44.24749 | 77.75144 |
| 913.144  | 99.16887 | 44.33103 | 77.8078  |
| 913.6261 | 99.14049 | 44.4123  | 77.86345 |
| 914.1082 | 99.11723 | 44.49144 | 77.91811 |
| 914.5903 | 99.1034  | 44.56828 | 77.97139 |
| 915.0724 | 99.10073 | 44.64243 | 78.02282 |
| 915.5546 | 99.10807 | 44.71343 | 78.07199 |
| 916.0367 | 99.12218 | 44.78096 | 78.11857 |
| 916.5189 | 99.13912 | 44.8448  | 78.16239 |
| 917.001  | 99.15571 | 44.90484 | 78.20342 |
| 917.4831 | 99.1705  | 44.9609  | 78.24171 |
| 917.9652 | 99.18383 | 45.01268 | 78.27741 |
| 918.4473 | 99.19707 | 45.05977 | 78.31076 |
| 918.9294 | 99.21154 | 45.10179 | 78.34204 |
| 919.4116 | 99.22751 | 45.13859 | 78.37158 |
| 919.8937 | 99.24381 | 45.17031 | 78.39961 |
| 920.3759 | 99.25822 | 45.19737 | 78.42625 |
| 920.858  | 99.26827 | 45.22029 | 78.45134 |
| 921.3401 | 99.27219 | 45.23949 | 78.4745  |
| 921.8222 | 99.26931 | 45.25512 | 78.49516 |
| 922.3043 | 99.26012 | 45.26707 | 78.51277 |
| 922.7864 | 99.24585 | 45.27515 | 78.52699 |
| 923.2686 | 99.22774 | 45.27924 | 78.53779 |



|          |          |          |          |
|----------|----------|----------|----------|
| 923.7507 | 99.20675 | 45.27948 | 78.5455  |
| 924.2328 | 99.18362 | 45.27626 | 78.55063 |
| 924.715  | 99.15915 | 45.27006 | 78.55374 |
| 925.1971 | 99.13451 | 45.26127 | 78.55517 |
| 925.6792 | 99.11153 | 45.25    | 78.55498 |
| 926.1613 | 99.09201 | 45.23613 | 78.55296 |
| 926.6434 | 99.07729 | 45.21941 | 78.54879 |
| 927.1255 | 99.06725 | 45.19968 | 78.5422  |
| 927.6077 | 99.06026 | 45.17702 | 78.53313 |
| 928.0898 | 99.05343 | 45.15175 | 78.52175 |
| 928.572  | 99.04389 | 45.12426 | 78.50836 |
| 929.0541 | 99.03    | 45.09477 | 78.49329 |
| 929.5362 | 99.01215 | 45.0632  | 78.47673 |
| 930.0183 | 98.99293 | 45.02915 | 78.45874 |
| 930.5004 | 98.97625 | 44.99206 | 78.43931 |
| 930.9826 | 98.96577 | 44.95147 | 78.41843 |
| 931.4647 | 98.96346 | 44.9073  | 78.39623 |
| 931.9468 | 98.96864 | 44.85982 | 78.37294 |
| 932.429  | 98.9783  | 44.80961 | 78.34889 |
| 932.9111 | 98.9879  | 44.75727 | 78.32434 |
| 933.3932 | 98.99316 | 44.70324 | 78.29936 |
| 933.8753 | 98.99123 | 44.64765 | 78.27381 |
| 934.3574 | 98.9815  | 44.59038 | 78.24735 |
| 934.8396 | 98.96541 | 44.53129 | 78.21955 |
| 935.3217 | 98.94569 | 44.4703  | 78.18993 |
| 935.8038 | 98.92511 | 44.4075  | 78.15807 |
| 936.2859 | 98.90576 | 44.34305 | 78.1236  |
| 936.7681 | 98.8885  | 44.27703 | 78.08609 |
| 937.2502 | 98.8731  | 44.20934 | 78.04509 |
| 937.7323 | 98.85854 | 44.13961 | 78.00008 |
| 938.2144 | 98.84347 | 44.06738 | 77.95057 |
| 938.6966 | 98.82645 | 43.99226 | 77.8962  |
| 939.1787 | 98.80607 | 43.91409 | 77.83683 |
| 939.6608 | 98.78101 | 43.83297 | 77.7726  |
| 940.1429 | 98.75035 | 43.74918 | 77.70387 |
| 940.6251 | 98.71393 | 43.66295 | 77.63114 |
| 941.1072 | 98.67258 | 43.57433 | 77.55494 |
| 941.5893 | 98.62841 | 43.48317 | 77.47584 |
| 942.0714 | 98.5841  | 43.38921 | 77.39439 |
| 942.5536 | 98.54225 | 43.29235 | 77.31121 |
| 943.0357 | 98.50422 | 43.19275 | 77.22701 |
| 943.5178 | 98.46915 | 43.09089 | 77.14257 |
| 943.9999 | 98.43378 | 42.98742 | 77.0587  |
| 944.4821 | 98.39296 | 42.88296 | 76.97618 |

|          |          |          |          |
|----------|----------|----------|----------|
| 944.9642 | 98.34093 | 42.77785 | 76.8957  |
| 945.4463 | 98.273   | 42.67212 | 76.81781 |
| 945.9284 | 98.18681 | 42.56555 | 76.74301 |
| 946.4106 | 98.08327 | 42.45792 | 76.67177 |
| 946.8927 | 97.96606 | 42.34918 | 76.60458 |
| 947.3748 | 97.84109 | 42.23951 | 76.54192 |
| 947.8569 | 97.71493 | 42.12929 | 76.48422 |
| 948.3391 | 97.59386 | 42.01886 | 76.43175 |
| 948.8212 | 97.48332 | 41.9084  | 76.38458 |
| 949.3033 | 97.38778 | 41.79784 | 76.34256 |
| 949.7855 | 97.31104 | 41.68692 | 76.30541 |
| 950.2676 | 97.25662 | 41.57543 | 76.27284 |
| 950.7497 | 97.22794 | 41.46328 | 76.24463 |
| 951.2318 | 97.22791 | 41.35062 | 76.22068 |
| 951.7139 | 97.25867 | 41.23772 | 76.20093 |
| 952.196  | 97.32071 | 41.12478 | 76.18539 |
| 952.6782 | 97.41251 | 41.01184 | 76.17398 |
| 953.1603 | 97.52982 | 40.8987  | 76.16655 |
| 953.6425 | 97.66613 | 40.78505 | 76.16294 |
| 954.1246 | 97.81313 | 40.67068 | 76.16297 |
| 954.6067 | 97.96213 | 40.55558 | 76.16652 |
| 955.0888 | 98.10526 | 40.44    | 76.17345 |
| 955.5709 | 98.23677 | 40.32429 | 76.18356 |
| 956.053  | 98.35362 | 40.2087  | 76.19643 |
| 956.5352 | 98.45525 | 40.09322 | 76.21139 |
| 957.0173 | 98.54305 | 39.97755 | 76.22748 |
| 957.4995 | 98.61932 | 39.86127 | 76.24359 |
| 957.9816 | 98.68681 | 39.74403 | 76.25857 |
| 958.4637 | 98.74796 | 39.6258  | 76.27138 |
| 958.9458 | 98.80462 | 39.50685 | 76.28118 |
| 959.4279 | 98.85809 | 39.38763 | 76.28732 |
| 959.91   | 98.9091  | 39.26852 | 76.28929 |
| 960.3922 | 98.95762 | 39.14961 | 76.28664 |
| 960.8743 | 99.00294 | 39.03066 | 76.27899 |
| 961.3564 | 99.04356 | 38.9112  | 76.26605 |
| 961.8386 | 99.07765 | 38.79081 | 76.24768 |
| 962.3207 | 99.10344 | 38.66931 | 76.22396 |
| 962.8028 | 99.11983 | 38.54692 | 76.19519 |
| 963.2849 | 99.12691 | 38.4241  | 76.16185 |
| 963.767  | 99.12614 | 38.30136 | 76.12446 |
| 964.2491 | 99.11989 | 38.17904 | 76.08352 |
| 964.7313 | 99.11092 | 38.05721 | 76.03951 |
| 965.2134 | 99.10167 | 37.93575 | 75.99289 |
| 965.6956 | 99.09375 | 37.8145  | 75.94421 |

|          |          |          |          |
|----------|----------|----------|----------|
| 966.1777 | 99.08793 | 37.6935  | 75.89414 |
| 966.6598 | 99.08443 | 37.57298 | 75.84344 |
| 967.1419 | 99.08363 | 37.45333 | 75.79282 |
| 967.624  | 99.0864  | 37.33484 | 75.74287 |
| 968.1061 | 99.09412 | 37.2176  | 75.69389 |
| 968.5883 | 99.10824 | 37.1014  | 75.64586 |
| 969.0704 | 99.12917 | 36.98586 | 75.59851 |
| 969.5526 | 99.15564 | 36.87067 | 75.55148 |
| 970.0347 | 99.18434 | 36.75574 | 75.50444 |
| 970.5168 | 99.2105  | 36.64129 | 75.45721 |
| 970.9989 | 99.22905 | 36.5277  | 75.40978 |
| 971.481  | 99.23621 | 36.41531 | 75.36221 |
| 971.9631 | 99.23068 | 36.3042  | 75.3146  |
| 972.4453 | 99.21419 | 36.19411 | 75.26696 |
| 972.9274 | 99.19096 | 36.08459 | 75.21925 |
| 973.4095 | 99.16661 | 35.97513 | 75.17135 |
| 973.8917 | 99.1464  | 35.86548 | 75.12321 |
| 974.3738 | 99.13403 | 35.75565 | 75.07484 |
| 974.8559 | 99.13087 | 35.64589 | 75.02639 |
| 975.338  | 99.13628 | 35.53649 | 74.97802 |
| 975.8201 | 99.14806 | 35.42761 | 74.92995 |
| 976.3023 | 99.16348 | 35.31915 | 74.88232 |
| 976.7844 | 99.17995 | 35.21086 | 74.83522 |
| 977.2665 | 99.19535 | 35.10245 | 74.78862 |
| 977.7487 | 99.20796 | 34.99373 | 74.74241 |
| 978.2308 | 99.21658 | 34.88469 | 74.69634 |
| 978.7129 | 99.22038 | 34.77541 | 74.65008 |
| 979.195  | 99.21922 | 34.66591 | 74.60317 |
| 979.6771 | 99.21381 | 34.55604 | 74.5551  |
| 980.1593 | 99.20604 | 34.44551 | 74.5054  |
| 980.6414 | 99.19865 | 34.33402 | 74.45369 |
| 981.1235 | 99.19462 | 34.22147 | 74.39983 |
| 981.6057 | 99.19617 | 34.10807 | 74.34386 |
| 982.0878 | 99.20389 | 33.99429 | 74.28598 |
| 982.5699 | 99.21617 | 33.88068 | 74.22646 |
| 983.052  | 99.22942 | 33.76759 | 74.16547 |
| 983.5342 | 99.23891 | 33.65498 | 74.10314 |
| 984.0163 | 99.2402  | 33.54241 | 74.03946 |
| 984.4984 | 99.23042 | 33.42923 | 73.97448 |
| 984.9805 | 99.20937 | 33.31485 | 73.90834 |
| 985.4626 | 99.17977 | 33.19905 | 73.84132 |
| 985.9448 | 99.14653 | 33.08199 | 73.77376 |
| 986.4269 | 99.11559 | 32.96411 | 73.70591 |
| 986.909  | 99.09235 | 32.84589 | 73.63782 |

|          |          |          |          |
|----------|----------|----------|----------|
| 987.3912 | 99.08037 | 32.72756 | 73.56923 |
| 987.8733 | 99.08078 | 32.60903 | 73.49964 |
| 988.3554 | 99.09201 | 32.48996 | 73.42846 |
| 988.8375 | 99.11053 | 32.37002 | 73.35524 |
| 989.3196 | 99.13183 | 32.24904 | 73.27984 |
| 989.8018 | 99.15152 | 32.12715 | 73.20244 |
| 990.2839 | 99.16621 | 32.00469 | 73.12347 |
| 990.766  | 99.17406 | 31.88201 | 73.04342 |
| 991.2482 | 99.17473 | 31.75926 | 72.96261 |
| 991.7303 | 99.16911 | 31.63637 | 72.88113 |
| 992.2124 | 99.15889 | 31.51312 | 72.79883 |
| 992.6945 | 99.1461  | 31.38931 | 72.71545 |
| 993.1766 | 99.13274 | 31.26497 | 72.63076 |
| 993.6588 | 99.1206  | 31.14035 | 72.54466 |
| 994.1409 | 99.11104 | 31.01583 | 72.45721 |
| 994.623  | 99.105   | 30.89172 | 72.36855 |
| 995.1052 | 99.10269 | 30.76807 | 72.27878 |
| 995.5873 | 99.10378 | 30.64467 | 72.18794 |
| 996.0694 | 99.10734 | 30.52115 | 72.09597 |
| 996.5515 | 99.11217 | 30.39726 | 72.00278 |
| 997.0336 | 99.1172  | 30.27303 | 71.90832 |
| 997.5157 | 99.12183 | 30.14882 | 71.81266 |
| 997.9979 | 99.12621 | 30.02516 | 71.71595 |
| 998.48   | 99.131   | 29.90255 | 71.61835 |
| 998.9622 | 99.13702 | 29.78119 | 71.51998 |
| 999.4443 | 99.14457 | 29.66097 | 71.42084 |
| 999.9264 | 99.1531  | 29.54156 | 71.32089 |
| 1000.409 | 99.16108 | 29.42265 | 71.22    |
| 1000.891 | 99.1665  | 29.30415 | 71.1181  |
| 1001.373 | 99.16764 | 29.18626 | 71.01519 |
| 1001.855 | 99.16397 | 29.06938 | 70.9113  |
| 1002.337 | 99.15644 | 28.95384 | 70.80646 |
| 1002.819 | 99.14738 | 28.83978 | 70.70066 |
| 1003.301 | 99.13952 | 28.72701 | 70.59385 |
| 1003.783 | 99.1349  | 28.61516 | 70.486   |
| 1004.266 | 99.13404 | 28.50388 | 70.37708 |
| 1004.748 | 99.13548 | 28.393   | 70.2672  |
| 1005.23  | 99.13644 | 28.28266 | 70.15651 |
| 1005.712 | 99.13391 | 28.17319 | 70.04517 |
| 1006.194 | 99.12594 | 28.06487 | 69.93326 |
| 1006.676 | 99.11237 | 27.95788 | 69.82073 |
| 1007.158 | 99.09499 | 27.85214 | 69.70746 |
| 1007.64  | 99.0767  | 27.74752 | 69.59331 |
| 1008.122 | 99.06029 | 27.64394 | 69.47822 |

|          |          |          |          |
|----------|----------|----------|----------|
| 1008.605 | 99.04738 | 27.54158 | 69.3623  |
| 1009.087 | 99.03796 | 27.44086 | 69.24573 |
| 1009.569 | 99.03067 | 27.34225 | 69.12869 |
| 1010.051 | 99.02386 | 27.2461  | 69.0112  |
| 1010.533 | 99.01644 | 27.1524  | 68.89309 |
| 1011.015 | 99.00886 | 27.06085 | 68.77398 |
| 1011.497 | 99.00275 | 26.97097 | 68.65346 |
| 1011.979 | 99.00034 | 26.88237 | 68.53125 |
| 1012.462 | 99.00327 | 26.79499 | 68.40732 |
| 1012.944 | 99.01173 | 26.7091  | 68.28191 |
| 1013.426 | 99.02412 | 26.62515 | 68.15543 |
| 1013.908 | 99.03748 | 26.54354 | 68.02822 |
| 1014.39  | 99.0484  | 26.46438 | 67.90042 |
| 1014.872 | 99.05419 | 26.38744 | 67.7719  |
| 1015.354 | 99.05368 | 26.31233 | 67.64233 |
| 1015.836 | 99.04745 | 26.2387  | 67.51133 |
| 1016.319 | 99.03776 | 26.16649 | 67.37866 |
| 1016.801 | 99.02765 | 26.09597 | 67.24427 |
| 1017.283 | 99.02021 | 26.02762 | 67.10828 |
| 1017.765 | 99.01789 | 25.96186 | 66.97081 |
| 1018.247 | 99.02174 | 25.89888 | 66.83189 |
| 1018.729 | 99.03142 | 25.83854 | 66.69135 |
| 1019.211 | 99.04504 | 25.78053 | 66.5489  |
| 1019.693 | 99.05966 | 25.72457 | 66.40426 |
| 1020.176 | 99.07179 | 25.67062 | 66.25727 |
| 1020.658 | 99.07827 | 25.61891 | 66.10805 |
| 1021.14  | 99.07721 | 25.56985 | 65.95687 |
| 1021.622 | 99.06849 | 25.52375 | 65.80411 |
| 1022.104 | 99.05411 | 25.48071 | 65.65006 |
| 1022.586 | 99.03748 | 25.44052 | 65.49484 |
| 1023.068 | 99.02266 | 25.40285 | 65.33839 |
| 1023.55  | 99.01308 | 25.36749 | 65.18057 |
| 1024.033 | 99.01043 | 25.33449 | 65.02125 |
| 1024.515 | 99.01429 | 25.30422 | 64.86034 |
| 1024.997 | 99.02238 | 25.27716 | 64.69779 |
| 1025.479 | 99.03152 | 25.25372 | 64.5335  |
| 1025.961 | 99.03857 | 25.23397 | 64.36729 |
| 1026.443 | 99.04153 | 25.21766 | 64.19885 |
| 1026.925 | 99.03974 | 25.20442 | 64.02783 |
| 1027.407 | 99.03375 | 25.19401 | 63.85398 |
| 1027.89  | 99.02477 | 25.1866  | 63.67728 |
| 1028.372 | 99.01405 | 25.18274 | 63.49792 |
| 1028.854 | 99.00267 | 25.18321 | 63.31626 |
| 1029.336 | 98.9914  | 25.18876 | 63.13272 |

|          |          |          |          |
|----------|----------|----------|----------|
| 1029.818 | 98.981   | 25.19979 | 62.94759 |
| 1030.3   | 98.97229 | 25.21629 | 62.76103 |
| 1030.782 | 98.96609 | 25.238   | 62.57314 |
| 1031.264 | 98.96269 | 25.2646  | 62.38401 |
| 1031.747 | 98.96142 | 25.29604 | 62.19389 |
| 1032.229 | 98.96059 | 25.33256 | 62.00317 |
| 1032.711 | 98.95782 | 25.37461 | 61.81229 |
| 1033.193 | 98.95081 | 25.42261 | 61.62163 |
| 1033.675 | 98.93833 | 25.47676 | 61.43139 |
| 1034.157 | 98.92091 | 25.53697 | 61.24154 |
| 1034.639 | 98.90073 | 25.60298 | 61.05196 |
| 1035.121 | 98.88087 | 25.67458 | 60.86258 |
| 1035.604 | 98.86423 | 25.75178 | 60.67354 |
| 1036.086 | 98.85225 | 25.83488 | 60.48519 |
| 1036.568 | 98.84444 | 25.92432 | 60.29806 |
| 1037.05  | 98.83875 | 26.02043 | 60.11271 |
| 1037.532 | 98.83247 | 26.12322 | 59.92961 |
| 1038.014 | 98.82355 | 26.23242 | 59.74912 |
| 1038.496 | 98.81135 | 26.34756 | 59.57163 |
| 1038.979 | 98.797   | 26.46829 | 59.39767 |
| 1039.461 | 98.78262 | 26.59458 | 59.22805 |
| 1039.943 | 98.77039 | 26.72674 | 59.06391 |
| 1040.425 | 98.76141 | 26.86532 | 58.90653 |
| 1040.907 | 98.75529 | 27.01084 | 58.7572  |
| 1041.389 | 98.7501  | 27.16354 | 58.61705 |
| 1041.871 | 98.74315 | 27.32335 | 58.48698 |
| 1042.353 | 98.73193 | 27.48993 | 58.36778 |
| 1042.835 | 98.71481 | 27.66299 | 58.26032 |
| 1043.318 | 98.69151 | 27.84242 | 58.16569 |
| 1043.8   | 98.66314 | 28.02834 | 58.08523 |
| 1044.282 | 98.6321  | 28.22105 | 58.0205  |
| 1044.764 | 98.6016  | 28.42074 | 57.97308 |
| 1045.246 | 98.57553 | 28.62735 | 57.94434 |
| 1045.728 | 98.55798 | 28.84052 | 57.93537 |
| 1046.21  | 98.55274 | 29.05975 | 57.94697 |
| 1046.692 | 98.56242 | 29.28461 | 57.97974 |
| 1047.175 | 98.58773 | 29.51496 | 58.03414 |
| 1047.657 | 98.62691 | 29.75094 | 58.11054 |
| 1048.139 | 98.67571 | 29.99286 | 58.20923 |
| 1048.621 | 98.72823 | 30.24096 | 58.33024 |
| 1049.103 | 98.77818 | 30.49517 | 58.47339 |
| 1049.585 | 98.82034 | 30.75503 | 58.63821 |
| 1050.067 | 98.85174 | 31.01985 | 58.82412 |
| 1050.549 | 98.87202 | 31.28888 | 59.03049 |

|          |          |          |          |
|----------|----------|----------|----------|
| 1051.031 | 98.88318 | 31.56154 | 59.25682 |
| 1051.514 | 98.88831 | 31.83747 | 59.50265 |
| 1051.996 | 98.89039 | 32.11647 | 59.76752 |
| 1052.478 | 98.89132 | 32.39827 | 60.05071 |
| 1052.96  | 98.89171 | 32.68241 | 60.3512  |
| 1053.442 | 98.89131 | 32.96818 | 60.66755 |
| 1053.924 | 98.88987 | 33.25479 | 60.99801 |
| 1054.406 | 98.88783 | 33.54154 | 61.3407  |
| 1054.889 | 98.88656 | 33.82797 | 61.69373 |
| 1055.371 | 98.88802 | 34.11396 | 62.05526 |
| 1055.853 | 98.89382 | 34.3995  | 62.42349 |
| 1056.335 | 98.90456 | 34.68448 | 62.79652 |
| 1056.817 | 98.91918 | 34.96849 | 63.17229 |
| 1057.299 | 98.9353  | 35.25075 | 63.54861 |
| 1057.781 | 98.9498  | 35.53022 | 63.92322 |
| 1058.263 | 98.96002 | 35.80584 | 64.29404 |
| 1058.746 | 98.96458 | 36.07671 | 64.65921 |
| 1059.228 | 98.9639  | 36.34223 | 65.0172  |
| 1059.71  | 98.95994 | 36.60198 | 65.36669 |
| 1060.192 | 98.95549 | 36.85561 | 65.70648 |
| 1060.674 | 98.95335 | 37.10263 | 66.03529 |
| 1061.156 | 98.95538 | 37.34243 | 66.35182 |
| 1061.638 | 98.96219 | 37.57434 | 66.65478 |
| 1062.12  | 98.97311 | 37.79786 | 66.9431  |
| 1062.603 | 98.98669 | 38.01274 | 67.21604 |
| 1063.085 | 99.00127 | 38.21903 | 67.47329 |
| 1063.567 | 99.01562 | 38.41697 | 67.71482 |
| 1064.049 | 99.02927 | 38.6067  | 67.94083 |
| 1064.531 | 99.04253 | 38.78815 | 68.15152 |
| 1065.013 | 99.05609 | 38.96094 | 68.34705 |
| 1065.495 | 99.07067 | 39.12454 | 68.52753 |
| 1065.977 | 99.08653 | 39.27847 | 68.69317 |
| 1066.46  | 99.10322 | 39.42249 | 68.8443  |
| 1066.942 | 99.11958 | 39.55668 | 68.98144 |
| 1067.424 | 99.13412 | 39.68136 | 69.10527 |
| 1067.906 | 99.14553 | 39.79688 | 69.21652 |
| 1068.388 | 99.1531  | 39.90352 | 69.31585 |
| 1068.87  | 99.15709 | 40.00134 | 69.40386 |
| 1069.352 | 99.15874 | 40.09032 | 69.48114 |
| 1069.834 | 99.1599  | 40.17045 | 69.54827 |
| 1070.317 | 99.16245 | 40.24189 | 69.60593 |
| 1070.799 | 99.16769 | 40.305   | 69.65487 |
| 1071.281 | 99.17584 | 40.3602  | 69.69583 |
| 1071.763 | 99.18597 | 40.40778 | 69.72946 |

|          |          |          |          |
|----------|----------|----------|----------|
| 1072.245 | 99.19618 | 40.44786 | 69.75626 |
| 1072.727 | 99.20428 | 40.48025 | 69.77659 |
| 1073.209 | 99.2083  | 40.50471 | 69.79077 |
| 1073.691 | 99.20721 | 40.52108 | 69.79921 |
| 1074.174 | 99.20104 | 40.52952 | 69.80245 |
| 1074.656 | 99.19086 | 40.53051 | 69.80113 |
| 1075.138 | 99.17845 | 40.5248  | 69.79591 |
| 1075.62  | 99.16575 | 40.51317 | 69.78728 |
| 1076.102 | 99.15436 | 40.49627 | 69.77553 |
| 1076.584 | 99.14542 | 40.47451 | 69.76064 |
| 1077.066 | 99.13934 | 40.44815 | 69.74248 |
| 1077.548 | 99.13612 | 40.41741 | 69.72089 |
| 1078.031 | 99.13538 | 40.38263 | 69.69582 |
| 1078.513 | 99.1368  | 40.3443  | 69.66742 |
| 1078.995 | 99.14    | 40.30296 | 69.63599 |
| 1079.477 | 99.14483 | 40.25906 | 69.60184 |
| 1079.959 | 99.15112 | 40.2128  | 69.56525 |
| 1080.441 | 99.15867 | 40.16412 | 69.52639 |
| 1080.923 | 99.16708 | 40.11281 | 69.48539 |
| 1081.406 | 99.17575 | 40.05867 | 69.44238 |
| 1081.888 | 99.18388 | 40.00171 | 69.39757 |
| 1082.37  | 99.19075 | 39.94217 | 69.35126 |
| 1082.852 | 99.19574 | 39.88046 | 69.30375 |
| 1083.334 | 99.19863 | 39.81697 | 69.25523 |
| 1083.816 | 99.19942 | 39.75197 | 69.20571 |
| 1084.298 | 99.19841 | 39.6855  | 69.15504 |
| 1084.78  | 99.19585 | 39.61751 | 69.103   |
| 1085.262 | 99.19184 | 39.54798 | 69.04943 |
| 1085.745 | 99.18632 | 39.47709 | 68.99439 |
| 1086.227 | 99.1792  | 39.40517 | 68.93816 |
| 1086.709 | 99.17053 | 39.33268 | 68.88117 |
| 1087.191 | 99.161   | 39.25996 | 68.82383 |
| 1087.673 | 99.15195 | 39.18712 | 68.76641 |
| 1088.155 | 99.1453  | 39.11402 | 68.70895 |
| 1088.637 | 99.14302 | 39.04038 | 68.65132 |
| 1089.119 | 99.14654 | 38.96601 | 68.59333 |
| 1089.602 | 99.15627 | 38.89094 | 68.53485 |
| 1090.084 | 99.17129 | 38.81547 | 68.47592 |
| 1090.566 | 99.18958 | 38.74008 | 68.41671 |
| 1091.048 | 99.2087  | 38.66518 | 68.35743 |
| 1091.53  | 99.22645 | 38.59095 | 68.29825 |
| 1092.012 | 99.24149 | 38.51726 | 68.23921 |
| 1092.494 | 99.25372 | 38.44379 | 68.18029 |
| 1092.976 | 99.26383 | 38.37014 | 68.12143 |



|          |          |          |          |
|----------|----------|----------|----------|
| 1093.458 | 99.27312 | 38.29608 | 68.06265 |
| 1093.941 | 99.28266 | 38.22158 | 68.00403 |
| 1094.423 | 99.29312 | 38.14678 | 67.94574 |
| 1094.905 | 99.30468 | 38.07182 | 67.8879  |
| 1095.387 | 99.31715 | 37.99674 | 67.83056 |
| 1095.869 | 99.3303  | 37.92143 | 67.77365 |
| 1096.351 | 99.34385 | 37.84575 | 67.71707 |
| 1096.833 | 99.35748 | 37.76965 | 67.66071 |
| 1097.316 | 99.37041 | 37.69331 | 67.60459 |
| 1097.798 | 99.38135 | 37.6171  | 67.54879 |
| 1098.28  | 99.38852 | 37.54149 | 67.49342 |
| 1098.762 | 99.39017 | 37.46679 | 67.4385  |
| 1099.244 | 99.38538 | 37.39303 | 67.38393 |
| 1099.726 | 99.37478 | 37.31993 | 67.32946 |
| 1100.208 | 99.36075 | 37.24701 | 67.27479 |
| 1100.69  | 99.34711 | 37.17382 | 67.21971 |
| 1101.173 | 99.33792 | 37.10016 | 67.16423 |
| 1101.655 | 99.33625 | 37.02608 | 67.10852 |
| 1102.137 | 99.34298 | 36.95185 | 67.05294 |
| 1102.619 | 99.35638 | 36.87774 | 66.99779 |
| 1103.101 | 99.37257 | 36.80387 | 66.9433  |
| 1103.583 | 99.38688 | 36.73013 | 66.8895  |
| 1104.065 | 99.39517 | 36.65633 | 66.8363  |
| 1104.547 | 99.39526 | 36.58227 | 66.78358 |
| 1105.03  | 99.38746 | 36.50794 | 66.73125 |
| 1105.512 | 99.37416 | 36.43352 | 66.6793  |
| 1105.994 | 99.35876 | 36.35927 | 66.62776 |
| 1106.476 | 99.34459 | 36.28534 | 66.57659 |
| 1106.958 | 99.33375 | 36.21166 | 66.52566 |
| 1107.44  | 99.327   | 36.13789 | 66.47474 |
| 1107.922 | 99.32385 | 36.06362 | 66.42364 |
| 1108.404 | 99.32338 | 35.98853 | 66.37227 |
| 1108.886 | 99.32473 | 35.91259 | 66.32074 |
| 1109.369 | 99.32764 | 35.83605 | 66.26933 |
| 1109.851 | 99.33213 | 35.75935 | 66.21837 |
| 1110.333 | 99.33832 | 35.68289 | 66.16811 |
| 1110.815 | 99.34564 | 35.60683 | 66.11859 |
| 1111.297 | 99.3529  | 35.53109 | 66.06965 |
| 1111.779 | 99.35818 | 35.45544 | 66.02105 |
| 1112.261 | 99.35947 | 35.37971 | 65.97261 |
| 1112.744 | 99.35557 | 35.30394 | 65.92436 |
| 1113.226 | 99.34642 | 35.22839 | 65.87651 |
| 1113.708 | 99.33364 | 35.15347 | 65.82945 |
| 1114.19  | 99.32007 | 35.07946 | 65.78349 |

|          |          |          |          |
|----------|----------|----------|----------|
| 1114.672 | 99.30914 | 35.0064  | 65.73876 |
| 1115.154 | 99.30399 | 34.93405 | 65.69518 |
| 1115.636 | 99.30655 | 34.86203 | 65.65246 |
| 1116.118 | 99.31716 | 34.79    | 65.61033 |
| 1116.601 | 99.33437 | 34.71787 | 65.56859 |
| 1117.083 | 99.35554 | 34.64582 | 65.52724 |
| 1117.565 | 99.37746 | 34.57416 | 65.48641 |
| 1118.047 | 99.39726 | 34.50315 | 65.44623 |
| 1118.529 | 99.41296 | 34.43283 | 65.40674 |
| 1119.011 | 99.42375 | 34.363   | 65.36782 |
| 1119.493 | 99.43002 | 34.29333 | 65.32925 |
| 1119.975 | 99.43288 | 34.22363 | 65.29076 |
| 1120.458 | 99.43371 | 34.15396 | 65.25217 |
| 1120.94  | 99.43376 | 34.08468 | 65.21341 |
| 1121.422 | 99.43386 | 34.01625 | 65.1745  |
| 1121.904 | 99.43428 | 33.94904 | 65.13542 |
| 1122.386 | 99.43504 | 33.88306 | 65.09608 |
| 1122.868 | 99.43596 | 33.81802 | 65.0563  |
| 1123.35  | 99.43686 | 33.75339 | 65.01585 |
| 1123.832 | 99.43773 | 33.68873 | 64.97461 |
| 1124.314 | 99.43873 | 33.62386 | 64.93261 |
| 1124.797 | 99.44006 | 33.559   | 64.89005 |
| 1125.279 | 99.44195 | 33.49457 | 64.84722 |
| 1125.761 | 99.44466 | 33.43104 | 64.80433 |
| 1126.243 | 99.44824 | 33.36864 | 64.76145 |
| 1126.725 | 99.45269 | 33.30735 | 64.71846 |
| 1127.207 | 99.45773 | 33.2469  | 64.67512 |
| 1127.689 | 99.4628  | 33.18706 | 64.6312  |
| 1128.172 | 99.467   | 33.12773 | 64.58657 |
| 1128.654 | 99.46925 | 33.06905 | 64.54124 |
| 1129.136 | 99.46857 | 33.0113  | 64.49534 |
| 1129.618 | 99.4645  | 32.95466 | 64.44894 |
| 1130.1   | 99.45737 | 32.89912 | 64.40208 |
| 1130.582 | 99.44852 | 32.84442 | 64.35466 |
| 1131.064 | 99.44005 | 32.79017 | 64.3066  |
| 1131.546 | 99.43427 | 32.73609 | 64.25789 |
| 1132.029 | 99.43307 | 32.6822  | 64.20867 |
| 1132.511 | 99.43717 | 32.62883 | 64.15922 |
| 1132.993 | 99.44604 | 32.57649 | 64.1098  |
| 1133.475 | 99.45792 | 32.52565 | 64.06058 |
| 1133.957 | 99.47069 | 32.47654 | 64.01151 |
| 1134.439 | 99.48246 | 32.4291  | 63.96238 |
| 1134.921 | 99.49239 | 32.38306 | 63.91292 |
| 1135.403 | 99.50074 | 32.33824 | 63.86301 |

|          |          |          |          |
|----------|----------|----------|----------|
| 1135.885 | 99.50865 | 32.29465 | 63.81279 |
| 1136.368 | 99.51743 | 32.25258 | 63.76261 |
| 1136.85  | 99.5278  | 32.21247 | 63.71295 |
| 1137.332 | 99.53955 | 32.17467 | 63.66416 |
| 1137.814 | 99.55151 | 32.13928 | 63.61631 |
| 1138.296 | 99.56202 | 32.1061  | 63.56914 |
| 1138.778 | 99.56989 | 32.07476 | 63.52214 |
| 1139.26  | 99.57475 | 32.04493 | 63.47478 |
| 1139.742 | 99.57738 | 32.01653 | 63.42664 |
| 1140.225 | 99.57925 | 31.98975 | 63.37754 |
| 1140.707 | 99.58187 | 31.96497 | 63.32753 |
| 1141.189 | 99.5859  | 31.94255 | 63.27672 |
| 1141.671 | 99.5907  | 31.9226  | 63.22522 |
| 1142.153 | 99.59447 | 31.90501 | 63.173   |
| 1142.635 | 99.59474 | 31.88954 | 63.11999 |
| 1143.117 | 99.58958 | 31.87604 | 63.06611 |
| 1143.599 | 99.57819 | 31.86461 | 63.01141 |
| 1144.082 | 99.5616  | 31.85562 | 62.95604 |
| 1144.564 | 99.54228 | 31.84956 | 62.90023 |
| 1145.046 | 99.52367 | 31.84681 | 62.84412 |
| 1145.528 | 99.50913 | 31.84744 | 62.78773 |
| 1146.01  | 99.50099 | 31.85117 | 62.73088 |
| 1146.492 | 99.50011 | 31.85752 | 62.67333 |
| 1146.974 | 99.50574 | 31.86604 | 62.61488 |
| 1147.457 | 99.51585 | 31.87656 | 62.55549 |
| 1147.939 | 99.52792 | 31.88919 | 62.49535 |
| 1148.421 | 99.53953 | 31.90429 | 62.4347  |
| 1148.903 | 99.54916 | 31.92217 | 62.37379 |
| 1149.385 | 99.55629 | 31.94295 | 62.31267 |
| 1149.867 | 99.56142 | 31.96649 | 62.25122 |
| 1150.349 | 99.56568 | 31.99249 | 62.1892  |
| 1150.831 | 99.57031 | 32.0207  | 62.12637 |
| 1151.313 | 99.57621 | 32.05112 | 62.06262 |
| 1151.796 | 99.58354 | 32.08402 | 61.99801 |
| 1152.278 | 99.59173 | 32.11982 | 61.93271 |
| 1152.76  | 99.59971 | 32.15886 | 61.86685 |
| 1153.242 | 99.60629 | 32.20124 | 61.80044 |
| 1153.724 | 99.6107  | 32.24675 | 61.73337 |
| 1154.206 | 99.61286 | 32.29499 | 61.6655  |
| 1154.688 | 99.61331 | 32.34566 | 61.59676 |
| 1155.17  | 99.61304 | 32.39866 | 61.5273  |
| 1155.653 | 99.61299 | 32.45423 | 61.45742 |
| 1156.135 | 99.61346 | 32.51276 | 61.38755 |
| 1156.617 | 99.61401 | 32.57461 | 61.31803 |

|          |          |          |          |
|----------|----------|----------|----------|
| 1157.099 | 99.6135  | 32.63988 | 61.24901 |
| 1157.581 | 99.61047 | 32.70837 | 61.18041 |
| 1158.063 | 99.60385 | 32.77973 | 61.11208 |
| 1158.545 | 99.5933  | 32.85363 | 61.04384 |
| 1159.027 | 99.57964 | 32.92999 | 60.97569 |
| 1159.51  | 99.56447 | 33.00902 | 60.9078  |
| 1159.992 | 99.54985 | 33.0911  | 60.84039 |
| 1160.474 | 99.5375  | 33.17657 | 60.77358 |
| 1160.956 | 99.52851 | 33.2655  | 60.70729 |
| 1161.438 | 99.52296 | 33.35765 | 60.64125 |
| 1161.92  | 99.52034 | 33.45257 | 60.57507 |
| 1162.402 | 99.51966 | 33.54981 | 60.50848 |
| 1162.885 | 99.52028 | 33.64914 | 60.44147 |
| 1163.367 | 99.52187 | 33.75059 | 60.37432 |
| 1163.849 | 99.5247  | 33.85436 | 60.30751 |
| 1164.331 | 99.52927 | 33.96068 | 60.24154 |
| 1164.813 | 99.53606 | 34.06956 | 60.17675 |
| 1165.295 | 99.54515 | 34.18078 | 60.11327 |
| 1165.777 | 99.5562  | 34.29395 | 60.05106 |
| 1166.259 | 99.56849 | 34.40874 | 59.99007 |
| 1166.741 | 99.5811  | 34.525   | 59.93037 |
| 1167.224 | 99.59334 | 34.64287 | 59.87222 |
| 1167.706 | 99.60474 | 34.76265 | 59.81594 |
| 1168.188 | 99.61508 | 34.8846  | 59.76186 |
| 1168.67  | 99.62438 | 35.00877 | 59.7101  |
| 1169.152 | 99.63243 | 35.13493 | 59.66063 |
| 1169.634 | 99.63902 | 35.26271 | 59.61323 |
| 1170.116 | 99.64368 | 35.39172 | 59.56776 |
| 1170.598 | 99.646   | 35.52176 | 59.52419 |
| 1171.081 | 99.64571 | 35.65291 | 59.48271 |
| 1171.563 | 99.64282 | 35.78535 | 59.44362 |
| 1172.045 | 99.63773 | 35.91928 | 59.4072  |
| 1172.527 | 99.63103 | 36.0547  | 59.37358 |
| 1173.009 | 99.62363 | 36.19137 | 59.34273 |
| 1173.491 | 99.61636 | 36.32894 | 59.31448 |
| 1173.973 | 99.60991 | 36.46706 | 59.28874 |
| 1174.455 | 99.60474 | 36.60561 | 59.26553 |
| 1174.938 | 99.60102 | 36.7447  | 59.24509 |
| 1175.42  | 99.59859 | 36.88458 | 59.22773 |
| 1175.902 | 99.59712 | 37.02548 | 59.21372 |
| 1176.384 | 99.59606 | 37.16744 | 59.20319 |
| 1176.866 | 99.59489 | 37.3103  | 59.19605 |
| 1177.348 | 99.59336 | 37.45374 | 59.19216 |
| 1177.83  | 99.59148 | 37.59749 | 59.1914  |

|          |          |          |          |
|----------|----------|----------|----------|
| 1178.313 | 99.58975 | 37.74149 | 59.19381 |
| 1178.795 | 99.58901 | 37.88584 | 59.19962 |
| 1179.277 | 99.59026 | 38.03079 | 59.20916 |
| 1179.759 | 99.59425 | 38.17654 | 59.22267 |
| 1180.241 | 99.60116 | 38.32307 | 59.24023 |
| 1180.723 | 99.61044 | 38.47015 | 59.2617  |
| 1181.205 | 99.62075 | 38.61747 | 59.28684 |
| 1181.687 | 99.63024 | 38.76478 | 59.31544 |
| 1182.169 | 99.63714 | 38.91206 | 59.34746 |
| 1182.652 | 99.64026 | 39.05956 | 59.38305 |
| 1183.134 | 99.63942 | 39.20765 | 59.42247 |
| 1183.616 | 99.63541 | 39.35664 | 59.46588 |
| 1184.098 | 99.62977 | 39.5066  | 59.51329 |
| 1184.58  | 99.62428 | 39.65732 | 59.56451 |
| 1185.062 | 99.62014 | 39.80837 | 59.61927 |
| 1185.544 | 99.61773 | 39.95937 | 59.67736 |
| 1186.026 | 99.61634 | 40.11006 | 59.73874 |
| 1186.509 | 99.61436 | 40.26045 | 59.80358 |
| 1186.991 | 99.61005 | 40.41071 | 59.87213 |
| 1187.473 | 99.60207 | 40.56101 | 59.94455 |
| 1187.955 | 99.5901  | 40.71139 | 60.02077 |
| 1188.437 | 99.57519 | 40.86168 | 60.10048 |
| 1188.919 | 99.55932 | 41.01158 | 60.18322 |
| 1189.401 | 99.545   | 41.16088 | 60.26863 |
| 1189.883 | 99.53448 | 41.3095  | 60.35654 |
| 1190.366 | 99.52912 | 41.45766 | 60.44701 |
| 1190.848 | 99.52906 | 41.60568 | 60.54031 |
| 1191.33  | 99.53336 | 41.75389 | 60.63663 |
| 1191.812 | 99.54035 | 41.90246 | 60.73602 |
| 1192.294 | 99.54827 | 42.0513  | 60.83828 |
| 1192.776 | 99.55566 | 42.20013 | 60.94304 |
| 1193.258 | 99.56163 | 42.34865 | 61.04994 |
| 1193.74  | 99.56585 | 42.49669 | 61.1588  |
| 1194.223 | 99.56833 | 42.64426 | 61.26965 |
| 1194.705 | 99.56915 | 42.79152 | 61.38269 |
| 1195.187 | 99.56829 | 42.93868 | 61.49813 |
| 1195.669 | 99.56567 | 43.08587 | 61.61607 |
| 1196.151 | 99.56128 | 43.23307 | 61.73643 |
| 1196.633 | 99.55537 | 43.38022 | 61.85898 |
| 1197.115 | 99.54849 | 43.52724 | 61.98349 |
| 1197.597 | 99.54158 | 43.67417 | 62.10982 |
| 1198.08  | 99.53558 | 43.82118 | 62.23799 |
| 1198.562 | 99.53128 | 43.96847 | 62.36809 |
| 1199.044 | 99.52909 | 44.11616 | 62.50016 |

|          |          |          |          |
|----------|----------|----------|----------|
| 1199.526 | 99.5289  | 44.26421 | 62.6341  |
| 1200.008 | 99.53039 | 44.41243 | 62.76964 |
| 1200.49  | 99.533   | 44.56052 | 62.90642 |
| 1200.972 | 99.53632 | 44.7083  | 63.04413 |
| 1201.454 | 99.54014 | 44.85576 | 63.18258 |
| 1201.937 | 99.54441 | 45.00309 | 63.32182 |
| 1202.419 | 99.54922 | 45.1506  | 63.46202 |
| 1202.901 | 99.55472 | 45.29856 | 63.60337 |
| 1203.383 | 99.56091 | 45.44715 | 63.74598 |
| 1203.865 | 99.56783 | 45.59635 | 63.88985 |
| 1204.347 | 99.57542 | 45.74611 | 64.03493 |
| 1204.829 | 99.58369 | 45.89642 | 64.18122 |
| 1205.312 | 99.59255 | 46.04743 | 64.32883 |
| 1205.794 | 99.60176 | 46.19946 | 64.478   |
| 1206.276 | 99.61081 | 46.35285 | 64.62901 |
| 1206.758 | 99.61882 | 46.50787 | 64.78206 |
| 1207.24  | 99.62481 | 46.66454 | 64.93717 |
| 1207.722 | 99.62791 | 46.82269 | 65.09418 |
| 1208.204 | 99.62762 | 46.982   | 65.25286 |
| 1208.686 | 99.62418 | 47.1422  | 65.41304 |
| 1209.168 | 99.61846 | 47.30318 | 65.5747  |
| 1209.651 | 99.61179 | 47.46502 | 65.73801 |
| 1210.133 | 99.60551 | 47.62796 | 65.90319 |
| 1210.615 | 99.60048 | 47.79217 | 66.07039 |
| 1211.097 | 99.59693 | 47.9577  | 66.23961 |
| 1211.579 | 99.59446 | 48.12444 | 66.41063 |
| 1212.061 | 99.59235 | 48.29214 | 66.58311 |
| 1212.543 | 99.58994 | 48.46065 | 66.75676 |
| 1213.025 | 99.58721 | 48.62995 | 66.93143 |
| 1213.508 | 99.58466 | 48.80023 | 67.10721 |
| 1213.99  | 99.58321 | 48.97178 | 67.2843  |
| 1214.472 | 99.58373 | 49.14488 | 67.46292 |
| 1214.954 | 99.58653 | 49.31961 | 67.64322 |
| 1215.436 | 99.59123 | 49.49583 | 67.82519 |
| 1215.918 | 99.59669 | 49.67325 | 68.0087  |
| 1216.4   | 99.60148 | 49.85154 | 68.19362 |
| 1216.882 | 99.60443 | 50.03052 | 68.37992 |
| 1217.365 | 99.60519 | 50.21017 | 68.56765 |
| 1217.847 | 99.60435 | 50.39065 | 68.75693 |
| 1218.329 | 99.60319 | 50.57217 | 68.94788 |
| 1218.811 | 99.60339 | 50.75489 | 69.14052 |
| 1219.293 | 99.60625 | 50.93884 | 69.33472 |
| 1219.775 | 99.61223 | 51.12394 | 69.53031 |
| 1220.257 | 99.62074 | 51.3101  | 69.72708 |

|          |          |          |          |
|----------|----------|----------|----------|
| 1220.74  | 99.63029 | 51.49723 | 69.92491 |
| 1221.222 | 99.63898 | 51.68533 | 70.12374 |
| 1221.704 | 99.64497 | 51.87444 | 70.32354 |
| 1222.186 | 99.6471  | 52.06454 | 70.52423 |
| 1222.668 | 99.64493 | 52.25553 | 70.72566 |
| 1223.15  | 99.63901 | 52.44722 | 70.92759 |
| 1223.632 | 99.6305  | 52.63937 | 71.12977 |
| 1224.114 | 99.62094 | 52.83183 | 71.33207 |
| 1224.596 | 99.6119  | 53.02456 | 71.53449 |
| 1225.079 | 99.60472 | 53.21766 | 71.73715 |
| 1225.561 | 99.60037 | 53.41132 | 71.94021 |
| 1226.043 | 99.59924 | 53.60568 | 72.14377 |
| 1226.525 | 99.60123 | 53.80078 | 72.34778 |
| 1227.007 | 99.60582 | 53.99654 | 72.55202 |
| 1227.489 | 99.61211 | 54.19279 | 72.75621 |
| 1227.971 | 99.61904 | 54.38938 | 72.96011 |
| 1228.453 | 99.62563 | 54.58624 | 73.16358 |
| 1228.936 | 99.6311  | 54.7834  | 73.3666  |
| 1229.418 | 99.63516 | 54.98091 | 73.56922 |
| 1229.9   | 99.63785 | 55.1788  | 73.77142 |
| 1230.382 | 99.63962 | 55.37697 | 73.9731  |
| 1230.864 | 99.64108 | 55.57519 | 74.174   |
| 1231.346 | 99.64277 | 55.77319 | 74.3738  |
| 1231.828 | 99.64506 | 55.97076 | 74.5722  |
| 1232.31  | 99.64805 | 56.16779 | 74.76903 |
| 1232.792 | 99.65166 | 56.36431 | 74.9642  |
| 1233.275 | 99.65552 | 56.56043 | 75.1577  |
| 1233.757 | 99.65926 | 56.75622 | 75.34948 |
| 1234.239 | 99.66242 | 56.95165 | 75.53938 |
| 1234.721 | 99.66462 | 57.14657 | 75.72711 |
| 1235.203 | 99.66547 | 57.34077 | 75.91235 |
| 1235.685 | 99.66465 | 57.53404 | 76.09481 |
| 1236.167 | 99.66204 | 57.72627 | 76.27437 |
| 1236.65  | 99.65771 | 57.91747 | 76.45109 |
| 1237.132 | 99.65215 | 58.10773 | 76.62521 |
| 1237.614 | 99.64613 | 58.29708 | 76.79696 |
| 1238.096 | 99.64078 | 58.48551 | 76.96656 |
| 1238.578 | 99.63731 | 58.67283 | 77.13405 |
| 1239.06  | 99.63667 | 58.85882 | 77.29936 |
| 1239.542 | 99.63932 | 59.04322 | 77.46231 |
| 1240.024 | 99.64494 | 59.22584 | 77.6227  |
| 1240.507 | 99.65239 | 59.40659 | 77.78039 |
| 1240.989 | 99.65977 | 59.58545 | 77.93531 |
| 1241.471 | 99.66486 | 59.76243 | 78.08743 |

|          |          |          |          |
|----------|----------|----------|----------|
| 1241.953 | 99.66577 | 59.9375  | 78.23678 |
| 1242.435 | 99.6612  | 60.11059 | 78.38339 |
| 1242.917 | 99.65105 | 60.28162 | 78.52727 |
| 1243.399 | 99.63651 | 60.45055 | 78.66846 |
| 1243.881 | 99.61999 | 60.61743 | 78.80695 |
| 1244.364 | 99.60458 | 60.78238 | 78.94274 |
| 1244.846 | 99.59335 | 60.94552 | 79.07582 |
| 1245.328 | 99.58869 | 61.10692 | 79.2061  |
| 1245.81  | 99.59171 | 61.26655 | 79.3335  |
| 1246.292 | 99.60194 | 61.42422 | 79.45794 |
| 1246.774 | 99.61737 | 61.57969 | 79.57941 |
| 1247.256 | 99.63503 | 61.73275 | 79.69796 |
| 1247.738 | 99.65154 | 61.88323 | 79.81372 |
| 1248.22  | 99.66403 | 62.03112 | 79.92686 |
| 1248.703 | 99.67068 | 62.17648 | 80.03749 |
| 1249.185 | 99.6711  | 62.31941 | 80.14564 |
| 1249.667 | 99.66627 | 62.45996 | 80.25121 |
| 1250.149 | 99.65807 | 62.59813 | 80.35405 |
| 1250.631 | 99.64879 | 62.73388 | 80.45399 |
| 1251.113 | 99.64053 | 62.86715 | 80.55097 |
| 1251.595 | 99.63474 | 62.99792 | 80.64504 |
| 1252.078 | 99.63217 | 63.12623 | 80.73636 |
| 1252.56  | 99.63284 | 63.25212 | 80.82515 |
| 1253.042 | 99.63638 | 63.37565 | 80.91157 |
| 1253.524 | 99.6422  | 63.49681 | 80.99572 |
| 1254.006 | 99.64974 | 63.61556 | 81.07758 |
| 1254.488 | 99.65839 | 63.73186 | 81.15711 |
| 1254.97  | 99.66748 | 63.84567 | 81.23426 |
| 1255.452 | 99.67625 | 63.95705 | 81.30904 |
| 1255.935 | 99.68375 | 64.06611 | 81.38152 |
| 1256.417 | 99.68903 | 64.17295 | 81.45181 |
| 1256.899 | 99.69144 | 64.27763 | 81.52002 |
| 1257.381 | 99.69073 | 64.3801  | 81.58619 |
| 1257.863 | 99.6874  | 64.4802  | 81.65033 |
| 1258.345 | 99.68253 | 64.57771 | 81.71246 |
| 1258.827 | 99.67767 | 64.67244 | 81.77263 |
| 1259.309 | 99.67448 | 64.76429 | 81.83096 |
| 1259.792 | 99.67419 | 64.8533  | 81.88766 |
| 1260.274 | 99.67741 | 64.93961 | 81.94293 |
| 1260.756 | 99.68389 | 65.02342 | 81.99694 |
| 1261.238 | 99.69263 | 65.10487 | 82.04975 |
| 1261.72  | 99.70219 | 65.18405 | 82.10131 |
| 1262.202 | 99.71104 | 65.26092 | 82.15149 |
| 1262.684 | 99.7179  | 65.33541 | 82.20016 |



|          |          |          |          |
|----------|----------|----------|----------|
| 1263.166 | 99.72209 | 65.40742 | 82.24724 |
| 1263.648 | 99.72362 | 65.47688 | 82.29273 |
| 1264.131 | 99.72298 | 65.54377 | 82.33671 |
| 1264.613 | 99.72115 | 65.6081  | 82.37927 |
| 1265.095 | 99.7192  | 65.66992 | 82.42052 |
| 1265.577 | 99.71804 | 65.72931 | 82.46052 |
| 1266.059 | 99.71827 | 65.78636 | 82.4993  |
| 1266.541 | 99.72009 | 65.84117 | 82.53689 |
| 1267.023 | 99.72314 | 65.89392 | 82.5733  |
| 1267.505 | 99.72682 | 65.94476 | 82.60859 |
| 1267.988 | 99.73034 | 65.99386 | 82.64275 |
| 1268.47  | 99.73293 | 66.04132 | 82.6758  |
| 1268.952 | 99.73417 | 66.08718 | 82.70766 |
| 1269.434 | 99.73395 | 66.13138 | 82.73826 |
| 1269.916 | 99.73248 | 66.17386 | 82.76752 |
| 1270.398 | 99.73018 | 66.21452 | 82.79542 |
| 1270.88  | 99.72752 | 66.25335 | 82.82204 |
| 1271.363 | 99.72467 | 66.29037 | 82.84756 |
| 1271.845 | 99.72163 | 66.32566 | 82.8722  |
| 1272.327 | 99.71822 | 66.35929 | 82.89616 |
| 1272.809 | 99.71421 | 66.39132 | 82.9196  |
| 1273.291 | 99.70976 | 66.42177 | 82.94255 |
| 1273.773 | 99.70535 | 66.45062 | 82.965   |
| 1274.255 | 99.70186 | 66.4779  | 82.98687 |
| 1274.737 | 99.70026 | 66.50367 | 83.0081  |
| 1275.219 | 99.70122 | 66.52806 | 83.02862 |
| 1275.702 | 99.70476 | 66.55125 | 83.04842 |
| 1276.184 | 99.71009 | 66.57342 | 83.0675  |
| 1276.666 | 99.71561 | 66.5947  | 83.08583 |
| 1277.148 | 99.71952 | 66.61515 | 83.10342 |
| 1277.63  | 99.72026 | 66.6348  | 83.12027 |
| 1278.112 | 99.71712 | 66.6536  | 83.13642 |
| 1278.594 | 99.71056 | 66.67151 | 83.15197 |
| 1279.076 | 99.70206 | 66.6885  | 83.16703 |
| 1279.559 | 99.69361 | 66.70455 | 83.18172 |
| 1280.041 | 99.68713 | 66.71961 | 83.19611 |
| 1280.523 | 99.68369 | 66.73362 | 83.2102  |
| 1281.005 | 99.68328 | 66.74653 | 83.22394 |
| 1281.487 | 99.6849  | 66.75826 | 83.23723 |
| 1281.969 | 99.68702 | 66.76883 | 83.25001 |
| 1282.451 | 99.68823 | 66.77832 | 83.26229 |
| 1282.933 | 99.68772 | 66.78691 | 83.2741  |
| 1283.416 | 99.68571 | 66.79485 | 83.28556 |
| 1283.898 | 99.6832  | 66.80235 | 83.29679 |

|          |          |          |          |
|----------|----------|----------|----------|
| 1284.38  | 99.68162 | 66.80962 | 83.30785 |
| 1284.862 | 99.68195 | 66.81677 | 83.31879 |
| 1285.344 | 99.68481 | 66.82384 | 83.32965 |
| 1285.826 | 99.6897  | 66.83086 | 83.34045 |
| 1286.308 | 99.69571 | 66.83788 | 83.35126 |
| 1286.791 | 99.70165 | 66.84498 | 83.36216 |
| 1287.273 | 99.7067  | 66.85225 | 83.37323 |
| 1287.755 | 99.71066 | 66.85981 | 83.38449 |
| 1288.237 | 99.71396 | 66.8677  | 83.39593 |
| 1288.719 | 99.71737 | 66.87592 | 83.40742 |
| 1289.201 | 99.72166 | 66.88439 | 83.41886 |
| 1289.683 | 99.72713 | 66.89302 | 83.43012 |
| 1290.165 | 99.7335  | 66.90168 | 83.44114 |
| 1290.647 | 99.74007 | 66.91032 | 83.45192 |
| 1291.13  | 99.74603 | 66.91889 | 83.4625  |
| 1291.612 | 99.7508  | 66.92736 | 83.47291 |
| 1292.094 | 99.75421 | 66.93569 | 83.48312 |
| 1292.576 | 99.75665 | 66.94384 | 83.4931  |
| 1293.058 | 99.75866 | 66.95175 | 83.50278 |
| 1293.54  | 99.76096 | 66.95939 | 83.51212 |
| 1294.022 | 99.7639  | 66.96677 | 83.52115 |
| 1294.504 | 99.76751 | 66.97398 | 83.52995 |
| 1294.987 | 99.77153 | 66.98113 | 83.53861 |
| 1295.469 | 99.77564 | 66.98836 | 83.54721 |
| 1295.951 | 99.77968 | 66.99577 | 83.55574 |
| 1296.433 | 99.78381 | 67.00342 | 83.56408 |
| 1296.915 | 99.7885  | 67.01134 | 83.57208 |
| 1297.397 | 99.79426 | 67.01953 | 83.57957 |
| 1297.879 | 99.80151 | 67.02798 | 83.58644 |
| 1298.361 | 99.81027 | 67.03672 | 83.59268 |
| 1298.844 | 99.82001 | 67.04576 | 83.59834 |
| 1299.326 | 99.82984 | 67.05508 | 83.60354 |
| 1299.808 | 99.83858 | 67.06463 | 83.60838 |
| 1300.29  | 99.84515 | 67.07434 | 83.61297 |
| 1300.772 | 99.84871 | 67.08412 | 83.61736 |
| 1301.254 | 99.84894 | 67.09392 | 83.6216  |
| 1301.736 | 99.84605 | 67.1038  | 83.62576 |
| 1302.219 | 99.84057 | 67.11386 | 83.62992 |
| 1302.701 | 99.8334  | 67.1243  | 83.63413 |
| 1303.183 | 99.82548 | 67.13528 | 83.63844 |
| 1303.665 | 99.81766 | 67.14694 | 83.64282 |
| 1304.147 | 99.81062 | 67.15934 | 83.64719 |
| 1304.629 | 99.80488 | 67.17247 | 83.65142 |
| 1305.111 | 99.8008  | 67.18626 | 83.65541 |

|          |          |          |          |
|----------|----------|----------|----------|
| 1305.593 | 99.79849 | 67.20065 | 83.6591  |
| 1306.075 | 99.7979  | 67.21562 | 83.66247 |
| 1306.558 | 99.79881 | 67.23115 | 83.66554 |
| 1307.04  | 99.80084 | 67.24725 | 83.66832 |
| 1307.522 | 99.80356 | 67.26394 | 83.67076 |
| 1308.004 | 99.80647 | 67.2812  | 83.67281 |
| 1308.486 | 99.8093  | 67.29906 | 83.6744  |
| 1308.968 | 99.81192 | 67.31754 | 83.6755  |
| 1309.45  | 99.81451 | 67.33672 | 83.67622 |
| 1309.932 | 99.8174  | 67.35673 | 83.67671 |
| 1310.415 | 99.82093 | 67.37768 | 83.67718 |
| 1310.897 | 99.82533 | 67.39965 | 83.67784 |
| 1311.379 | 99.83035 | 67.42264 | 83.67879 |
| 1311.861 | 99.83543 | 67.44657 | 83.68004 |
| 1312.343 | 99.83958 | 67.47129 | 83.6815  |
| 1312.825 | 99.8417  | 67.49662 | 83.68308 |
| 1313.307 | 99.84098 | 67.52244 | 83.68469 |
| 1313.789 | 99.83717 | 67.54866 | 83.68638 |
| 1314.272 | 99.83089 | 67.57527 | 83.68823 |
| 1314.754 | 99.82338 | 67.60228 | 83.6904  |
| 1315.236 | 99.81628 | 67.62972 | 83.69302 |
| 1315.718 | 99.81116 | 67.6576  | 83.69615 |
| 1316.2   | 99.80907 | 67.6859  | 83.69979 |
| 1316.682 | 99.81019 | 67.71464 | 83.70385 |
| 1317.164 | 99.81388 | 67.74384 | 83.70824 |
| 1317.646 | 99.81887 | 67.77355 | 83.71287 |
| 1318.129 | 99.82365 | 67.80383 | 83.71768 |
| 1318.611 | 99.82704 | 67.83469 | 83.72266 |
| 1319.093 | 99.82863 | 67.86611 | 83.72783 |
| 1319.575 | 99.82863 | 67.89799 | 83.73323 |
| 1320.057 | 99.828   | 67.9302  | 83.73894 |
| 1320.539 | 99.82787 | 67.96261 | 83.74507 |
| 1321.021 | 99.82904 | 67.99511 | 83.75176 |
| 1321.503 | 99.83186 | 68.02768 | 83.75915 |
| 1321.986 | 99.83591 | 68.06031 | 83.7674  |
| 1322.468 | 99.84025 | 68.09304 | 83.77657 |
| 1322.95  | 99.84351 | 68.12593 | 83.78669 |
| 1323.432 | 99.84444 | 68.15902 | 83.79774 |
| 1323.914 | 99.84212 | 68.19238 | 83.80966 |
| 1324.396 | 99.83623 | 68.22608 | 83.82242 |
| 1324.878 | 99.8271  | 68.26022 | 83.83598 |
| 1325.36  | 99.81567 | 68.29491 | 83.85026 |
| 1325.843 | 99.80335 | 68.33018 | 83.8651  |
| 1326.325 | 99.79169 | 68.36596 | 83.88017 |

|          |          |          |          |
|----------|----------|----------|----------|
| 1326.807 | 99.78203 | 68.40205 | 83.89491 |
| 1327.289 | 99.77538 | 68.43812 | 83.90865 |
| 1327.771 | 99.7722  | 68.47379 | 83.92066 |
| 1328.253 | 99.77235 | 68.50873 | 83.93036 |
| 1328.735 | 99.77522 | 68.54273 | 83.93741 |
| 1329.218 | 99.77998 | 68.57577 | 83.94182 |
| 1329.7   | 99.78574 | 68.60798 | 83.9439  |
| 1330.182 | 99.79179 | 68.63959 | 83.94416 |
| 1330.664 | 99.79767 | 68.67088 | 83.94315 |
| 1331.146 | 99.80307 | 68.70208 | 83.94145 |
| 1331.628 | 99.8076  | 68.73344 | 83.93953 |
| 1332.11  | 99.81088 | 68.76514 | 83.93781 |
| 1332.592 | 99.81237 | 68.79737 | 83.93663 |
| 1333.074 | 99.81161 | 68.83031 | 83.93631 |
| 1333.557 | 99.80839 | 68.86414 | 83.93711 |
| 1334.039 | 99.80304 | 68.89897 | 83.93918 |
| 1334.521 | 99.79643 | 68.93485 | 83.94261 |
| 1335.003 | 99.78988 | 68.97171 | 83.94736 |
| 1335.485 | 99.78476 | 69.00941 | 83.95331 |
| 1335.967 | 99.7821  | 69.04779 | 83.96033 |
| 1336.449 | 99.78236 | 69.08668 | 83.9683  |
| 1336.931 | 99.78515 | 69.12593 | 83.97719 |
| 1337.414 | 99.78944 | 69.1655  | 83.987   |
| 1337.896 | 99.79404 | 69.20534 | 83.99779 |
| 1338.378 | 99.79786 | 69.24544 | 84.00961 |
| 1338.86  | 99.80044 | 69.28577 | 84.02244 |
| 1339.342 | 99.8019  | 69.32627 | 84.03622 |
| 1339.824 | 99.80281 | 69.36688 | 84.05086 |
| 1340.306 | 99.80382 | 69.40752 | 84.06625 |
| 1340.788 | 99.80521 | 69.44816 | 84.08232 |
| 1341.271 | 99.8068  | 69.48877 | 84.09901 |
| 1341.753 | 99.80798 | 69.52937 | 84.11632 |
| 1342.235 | 99.80805 | 69.56994 | 84.13426 |
| 1342.717 | 99.80647 | 69.61049 | 84.15282 |
| 1343.199 | 99.80312 | 69.65105 | 84.17202 |
| 1343.681 | 99.7984  | 69.69163 | 84.19191 |
| 1344.163 | 99.79308 | 69.73227 | 84.21254 |
| 1344.646 | 99.78825 | 69.77299 | 84.23398 |
| 1345.128 | 99.78487 | 69.81384 | 84.25632 |
| 1345.61  | 99.78374 | 69.85479 | 84.27959 |
| 1346.092 | 99.78524 | 69.8958  | 84.3038  |
| 1346.574 | 99.78936 | 69.93677 | 84.32891 |
| 1347.056 | 99.7956  | 69.97761 | 84.35483 |
| 1347.538 | 99.80299 | 70.01822 | 84.38144 |

|          |          |          |          |
|----------|----------|----------|----------|
| 1348.02  | 99.8104  | 70.05855 | 84.4085  |
| 1348.502 | 99.81646 | 70.09854 | 84.43568 |
| 1348.985 | 99.8201  | 70.13813 | 84.46242 |
| 1349.467 | 99.82072 | 70.17719 | 84.48793 |
| 1349.949 | 99.81853 | 70.21554 | 84.51126 |
| 1350.431 | 99.81445 | 70.25294 | 84.53141 |
| 1350.913 | 99.81009 | 70.28916 | 84.5476  |
| 1351.395 | 99.80718 | 70.32413 | 84.55948 |
| 1351.877 | 99.80715 | 70.35791 | 84.56731 |
| 1352.359 | 99.81063 | 70.39079 | 84.5719  |
| 1352.842 | 99.81732 | 70.42316 | 84.57446 |
| 1353.324 | 99.82609 | 70.45547 | 84.57627 |
| 1353.806 | 99.83529 | 70.48805 | 84.57846 |
| 1354.288 | 99.84338 | 70.52115 | 84.58185 |
| 1354.77  | 99.8492  | 70.55481 | 84.58684 |
| 1355.252 | 99.85239 | 70.589   | 84.59352 |
| 1355.734 | 99.85326 | 70.62357 | 84.60174 |
| 1356.216 | 99.85243 | 70.6584  | 84.61124 |
| 1356.698 | 99.85064 | 70.69338 | 84.62175 |
| 1357.181 | 99.84821 | 70.72844 | 84.63307 |
| 1357.663 | 99.845   | 70.76356 | 84.64507 |
| 1358.145 | 99.84052 | 70.7987  | 84.65773 |
| 1358.627 | 99.83418 | 70.83384 | 84.67106 |
| 1359.109 | 99.82555 | 70.86892 | 84.68513 |
| 1359.591 | 99.81473 | 70.90391 | 84.7     |
| 1360.073 | 99.80247 | 70.93875 | 84.71573 |
| 1360.556 | 99.79006 | 70.97339 | 84.73227 |
| 1361.038 | 99.77924 | 71.0078  | 84.74942 |
| 1361.52  | 99.77179 | 71.04189 | 84.76684 |
| 1362.002 | 99.76914 | 71.0756  | 84.78406 |
| 1362.484 | 99.77192 | 71.10882 | 84.8006  |
| 1362.966 | 99.77962 | 71.14148 | 84.81613 |
| 1363.448 | 99.79073 | 71.17354 | 84.83052 |
| 1363.93  | 99.80314 | 71.20504 | 84.84391 |
| 1364.413 | 99.81477 | 71.23603 | 84.8566  |
| 1364.895 | 99.82397 | 71.26665 | 84.86893 |
| 1365.377 | 99.82989 | 71.29703 | 84.88121 |
| 1365.859 | 99.83212 | 71.32728 | 84.89367 |
| 1366.341 | 99.83076 | 71.35751 | 84.90642 |
| 1366.823 | 99.82613 | 71.38778 | 84.91953 |
| 1367.305 | 99.81862 | 71.41815 | 84.9331  |
| 1367.787 | 99.80862 | 71.44865 | 84.94727 |
| 1368.27  | 99.79662 | 71.47929 | 84.96225 |
| 1368.752 | 99.78334 | 71.51003 | 84.97825 |

|          |          |          |          |
|----------|----------|----------|----------|
| 1369.234 | 99.76973 | 71.54083 | 84.99542 |
| 1369.716 | 99.75695 | 71.57161 | 85.01379 |
| 1370.198 | 99.74612 | 71.60228 | 85.03331 |
| 1370.68  | 99.73801 | 71.63277 | 85.05385 |
| 1371.162 | 99.73282 | 71.66305 | 85.07525 |
| 1371.644 | 99.73011 | 71.69313 | 85.09735 |
| 1372.126 | 99.72873 | 71.72302 | 85.11998 |
| 1372.609 | 99.72737 | 71.75276 | 85.14292 |
| 1373.091 | 99.72491 | 71.78232 | 85.16585 |
| 1373.573 | 99.72079 | 71.81162 | 85.18839 |
| 1374.055 | 99.71537 | 71.84054 | 85.2101  |
| 1374.537 | 99.7097  | 71.86895 | 85.23059 |
| 1375.019 | 99.70505 | 71.89676 | 85.24966 |
| 1375.501 | 99.70227 | 71.92398 | 85.26732 |
| 1375.984 | 99.70154 | 71.9507  | 85.28386 |
| 1376.466 | 99.70244 | 71.97709 | 85.29972 |
| 1376.948 | 99.70416 | 72.0033  | 85.31541 |
| 1377.43  | 99.70611 | 72.02944 | 85.33135 |
| 1377.912 | 99.70801 | 72.05554 | 85.34785 |
| 1378.394 | 99.71004 | 72.08159 | 85.36512 |
| 1378.876 | 99.71258 | 72.10754 | 85.38331 |
| 1379.358 | 99.71603 | 72.13336 | 85.40256 |
| 1379.841 | 99.72041 | 72.15903 | 85.42304 |
| 1380.323 | 99.72541 | 72.18461 | 85.44489 |
| 1380.805 | 99.73033 | 72.21014 | 85.46818 |
| 1381.287 | 99.73443 | 72.23562 | 85.49275 |
| 1381.769 | 99.73721 | 72.26098 | 85.51814 |
| 1382.251 | 99.73846 | 72.28605 | 85.5436  |
| 1382.733 | 99.73824 | 72.31062 | 85.56823 |
| 1383.215 | 99.7367  | 72.33449 | 85.59114 |
| 1383.698 | 99.73404 | 72.35753 | 85.61169 |
| 1384.18  | 99.73018 | 72.37974 | 85.62949 |
| 1384.662 | 99.72498 | 72.40119 | 85.64443 |
| 1385.144 | 99.71844 | 72.42202 | 85.65656 |
| 1385.626 | 99.71074 | 72.44237 | 85.66602 |
| 1386.108 | 99.70258 | 72.46233 | 85.67302 |
| 1386.59  | 99.6949  | 72.48193 | 85.67776 |
| 1387.072 | 99.68871 | 72.50116 | 85.68052 |
| 1387.554 | 99.68449 | 72.52003 | 85.68164 |
| 1388.037 | 99.68201 | 72.53861 | 85.68159 |
| 1388.519 | 99.6805  | 72.55706 | 85.68091 |
| 1389.001 | 99.67889 | 72.5756  | 85.68022 |
| 1389.483 | 99.67628 | 72.5945  | 85.68018 |
| 1389.965 | 99.67225 | 72.61402 | 85.68136 |

|          |          |          |          |
|----------|----------|----------|----------|
| 1390.447 | 99.66674 | 72.63433 | 85.68428 |
| 1390.929 | 99.66003 | 72.6555  | 85.68925 |
| 1391.411 | 99.65237 | 72.67748 | 85.69642 |
| 1391.894 | 99.64392 | 72.70009 | 85.70564 |
| 1392.376 | 99.63476 | 72.72306 | 85.71657 |
| 1392.858 | 99.62486 | 72.7461  | 85.72873 |
| 1393.34  | 99.61466 | 72.76893 | 85.74166 |
| 1393.822 | 99.60477 | 72.79139 | 85.75503 |
| 1394.304 | 99.59615 | 72.81343 | 85.7688  |
| 1394.786 | 99.58967 | 72.83511 | 85.78314 |
| 1395.269 | 99.58561 | 72.85656 | 85.79833 |
| 1395.751 | 99.58353 | 72.87795 | 85.81468 |
| 1396.233 | 99.58236 | 72.89939 | 85.83231 |
| 1396.715 | 99.58099 | 72.92096 | 85.85111 |
| 1397.197 | 99.57877 | 72.94263 | 85.87074 |
| 1397.679 | 99.57583 | 72.96432 | 85.89065 |
| 1398.161 | 99.57323 | 72.9859  | 85.91029 |
| 1398.643 | 99.57259 | 73.00729 | 85.92929 |
| 1399.125 | 99.57551 | 73.02843 | 85.94756 |
| 1399.608 | 99.58271 | 73.04936 | 85.96539 |
| 1400.09  | 99.59362 | 73.07017 | 85.98337 |
| 1400.572 | 99.60655 | 73.09097 | 86.00223 |
| 1401.054 | 99.61914 | 73.11188 | 86.02268 |
| 1401.536 | 99.62912 | 73.13297 | 86.04528 |
| 1402.018 | 99.6347  | 73.15429 | 86.07039 |
| 1402.5   | 99.63506 | 73.17589 | 86.09815 |
| 1402.982 | 99.63015 | 73.19781 | 86.12848 |
| 1403.465 | 99.62106 | 73.22008 | 86.16108 |
| 1403.947 | 99.60954 | 73.2427  | 86.19542 |
| 1404.429 | 99.59785 | 73.26564 | 86.23075 |
| 1404.911 | 99.58786 | 73.28877 | 86.26608 |
| 1405.393 | 99.58086 | 73.31186 | 86.30023 |
| 1405.875 | 99.57689 | 73.33458 | 86.33184 |
| 1406.357 | 99.57513 | 73.35654 | 86.35952 |
| 1406.839 | 99.57418 | 73.37741 | 86.38206 |
| 1407.322 | 99.57274 | 73.39699 | 86.39873 |
| 1407.804 | 99.56992 | 73.41525 | 86.40941 |
| 1408.286 | 99.56555 | 73.43235 | 86.41463 |
| 1408.768 | 99.56008 | 73.44855 | 86.41532 |
| 1409.25  | 99.5545  | 73.46407 | 86.41254 |
| 1409.732 | 99.54971 | 73.47909 | 86.40728 |
| 1410.214 | 99.54642 | 73.49369 | 86.40037 |
| 1410.697 | 99.54455 | 73.50795 | 86.39245 |
| 1411.179 | 99.54345 | 73.52193 | 86.38406 |

|          |          |          |          |
|----------|----------|----------|----------|
| 1411.661 | 99.54188 | 73.53574 | 86.37561 |
| 1412.143 | 99.53849 | 73.54955 | 86.36749 |
| 1412.625 | 99.53209 | 73.56355 | 86.36001 |
| 1413.107 | 99.52188 | 73.57791 | 86.35346 |
| 1413.589 | 99.50764 | 73.59272 | 86.34813 |
| 1414.071 | 99.48949 | 73.608   | 86.34423 |
| 1414.553 | 99.46784 | 73.62369 | 86.34189 |
| 1415.036 | 99.44316 | 73.63968 | 86.34114 |
| 1415.518 | 99.41587 | 73.65581 | 86.34186 |
| 1416     | 99.38652 | 73.67195 | 86.34385 |
| 1416.482 | 99.35579 | 73.68802 | 86.34692 |
| 1416.964 | 99.3249  | 73.70396 | 86.3509  |
| 1417.446 | 99.29577 | 73.71976 | 86.35572 |
| 1417.928 | 99.27116 | 73.73545 | 86.36142 |
| 1418.41  | 99.25428 | 73.75102 | 86.36811 |
| 1418.893 | 99.24773 | 73.7665  | 86.37592 |
| 1419.375 | 99.25227 | 73.78189 | 86.38502 |
| 1419.857 | 99.26631 | 73.79725 | 86.3956  |
| 1420.339 | 99.28685 | 73.81265 | 86.40788 |
| 1420.821 | 99.31055 | 73.82818 | 86.42215 |
| 1421.303 | 99.33504 | 73.84393 | 86.43872 |
| 1421.785 | 99.35902 | 73.85999 | 86.45795 |
| 1422.267 | 99.38206 | 73.87642 | 86.48016 |
| 1422.75  | 99.40427 | 73.89322 | 86.50548 |
| 1423.232 | 99.42573 | 73.91029 | 86.53375 |
| 1423.714 | 99.44655 | 73.92748 | 86.56435 |
| 1424.196 | 99.46655 | 73.9445  | 86.59621 |
| 1424.678 | 99.4854  | 73.96107 | 86.62803 |
| 1425.16  | 99.50278 | 73.97698 | 86.65874 |
| 1425.642 | 99.51831 | 73.99218 | 86.68777 |
| 1426.125 | 99.53168 | 74.00675 | 86.7151  |
| 1426.607 | 99.54265 | 74.02088 | 86.74102 |
| 1427.089 | 99.55103 | 74.03474 | 86.7659  |
| 1427.571 | 99.55688 | 74.04844 | 86.78992 |
| 1428.053 | 99.56073 | 74.06197 | 86.81297 |
| 1428.535 | 99.56363 | 74.07521 | 86.8346  |
| 1429.017 | 99.56709 | 74.08793 | 86.85411 |
| 1429.499 | 99.57269 | 74.09988 | 86.87068 |
| 1429.981 | 99.58132 | 74.11083 | 86.88364 |
| 1430.464 | 99.59296 | 74.12072 | 86.89273 |
| 1430.946 | 99.60631 | 74.12966 | 86.89836 |
| 1431.428 | 99.61922 | 74.13799 | 86.90162 |
| 1431.91  | 99.62933 | 74.14612 | 86.90405 |
| 1432.392 | 99.63464 | 74.15447 | 86.90723 |



|          |          |          |          |
|----------|----------|----------|----------|
| 1432.874 | 99.63424 | 74.16327 | 86.91236 |
| 1433.356 | 99.62808 | 74.17262 | 86.92003 |
| 1433.838 | 99.61717 | 74.18243 | 86.93025 |
| 1434.321 | 99.60307 | 74.19255 | 86.94251 |
| 1434.803 | 99.58781 | 74.2028  | 86.95596 |
| 1435.285 | 99.57392 | 74.213   | 86.96965 |
| 1435.767 | 99.56403 | 74.22307 | 86.98272 |
| 1436.249 | 99.56032 | 74.23298 | 86.99466 |
| 1436.731 | 99.56366 | 74.2428  | 87.00549 |
| 1437.213 | 99.5732  | 74.25263 | 87.01563 |
| 1437.696 | 99.58671 | 74.26258 | 87.02577 |
| 1438.177 | 99.60179 | 74.27271 | 87.03657 |
| 1438.66  | 99.61651 | 74.28307 | 87.0485  |
| 1439.142 | 99.62966 | 74.29365 | 87.0617  |
| 1439.624 | 99.64059 | 74.30442 | 87.07607 |
| 1440.106 | 99.64887 | 74.31532 | 87.09128 |
| 1440.588 | 99.65419 | 74.32628 | 87.10701 |
| 1441.07  | 99.65649 | 74.33728 | 87.12308 |
| 1441.552 | 99.656   | 74.34831 | 87.13955 |
| 1442.035 | 99.65326 | 74.35943 | 87.15677 |
| 1442.517 | 99.64922 | 74.37074 | 87.17525 |
| 1442.999 | 99.645   | 74.38235 | 87.19549 |
| 1443.481 | 99.64159 | 74.39429 | 87.21765 |
| 1443.963 | 99.63968 | 74.40642 | 87.24123 |
| 1444.445 | 99.63949 | 74.41832 | 87.2648  |
| 1444.927 | 99.64075 | 74.42937 | 87.28609 |
| 1445.409 | 99.64284 | 74.43889 | 87.30258 |
| 1445.892 | 99.64502 | 74.44634 | 87.3122  |
| 1446.374 | 99.6468  | 74.45143 | 87.31368 |
| 1446.856 | 99.64786 | 74.45409 | 87.3066  |
| 1447.338 | 99.64838 | 74.45446 | 87.29112 |
| 1447.82  | 99.64879 | 74.4528  | 87.26804 |
| 1448.302 | 99.64948 | 74.44957 | 87.23876 |
| 1448.784 | 99.65056 | 74.44539 | 87.2054  |
| 1449.266 | 99.65172 | 74.44102 | 87.17057 |
| 1449.749 | 99.65231 | 74.43724 | 87.13688 |
| 1450.231 | 99.6515  | 74.43466 | 87.10648 |
| 1450.713 | 99.64861 | 74.43369 | 87.08064 |
| 1451.195 | 99.6431  | 74.4345  | 87.05973 |
| 1451.677 | 99.63483 | 74.43699 | 87.04331 |
| 1452.159 | 99.62393 | 74.44086 | 87.03036 |
| 1452.641 | 99.61066 | 74.44571 | 87.01963 |
| 1453.124 | 99.59522 | 74.45117 | 87.01004 |
| 1453.605 | 99.57774 | 74.45701 | 87.00098 |

|          |          |          |          |
|----------|----------|----------|----------|
| 1454.088 | 99.55817 | 74.46316 | 86.99241 |
| 1454.57  | 99.53659 | 74.46973 | 86.98475 |
| 1455.052 | 99.51357 | 74.47693 | 86.97871 |
| 1455.534 | 99.49073 | 74.485   | 86.975   |
| 1456.016 | 99.47089 | 74.49413 | 86.97424 |
| 1456.498 | 99.45773 | 74.50446 | 86.97686 |
| 1456.98  | 99.45412 | 74.51607 | 86.98307 |
| 1457.463 | 99.46037 | 74.52896 | 86.99288 |
| 1457.945 | 99.47409 | 74.5431  | 87.00611 |
| 1458.427 | 99.49188 | 74.55838 | 87.02239 |
| 1458.909 | 99.5109  | 74.57461 | 87.04114 |
| 1459.391 | 99.52947 | 74.59149 | 87.06157 |
| 1459.873 | 99.54662 | 74.60861 | 87.0827  |
| 1460.355 | 99.5616  | 74.62553 | 87.10351 |
| 1460.837 | 99.57351 | 74.6419  | 87.12319 |
| 1461.32  | 99.58143 | 74.65755 | 87.14136 |
| 1461.802 | 99.58463 | 74.6725  | 87.1581  |
| 1462.284 | 99.5829  | 74.68691 | 87.17376 |
| 1462.766 | 99.57697 | 74.70096 | 87.18875 |
| 1463.248 | 99.56863 | 74.7148  | 87.20333 |
| 1463.73  | 99.56052 | 74.72844 | 87.21751 |
| 1464.212 | 99.55541 | 74.74181 | 87.23112 |
| 1464.694 | 99.55517 | 74.75482 | 87.24392 |
| 1465.177 | 99.55968 | 74.76735 | 87.25569 |
| 1465.659 | 99.56699 | 74.77933 | 87.26627 |
| 1466.141 | 99.57416 | 74.7907  | 87.27544 |
| 1466.623 | 99.57848 | 74.80135 | 87.28285 |
| 1467.105 | 99.57823 | 74.81109 | 87.28785 |
| 1467.587 | 99.57277 | 74.81966 | 87.28947 |
| 1468.069 | 99.56236 | 74.82675 | 87.2866  |
| 1468.552 | 99.54758 | 74.83213 | 87.27842 |
| 1469.033 | 99.529   | 74.83584 | 87.26485 |
| 1469.516 | 99.50704 | 74.83826 | 87.2469  |
| 1469.998 | 99.48198 | 74.84001 | 87.2264  |
| 1470.48  | 99.45413 | 74.84179 | 87.20548 |
| 1470.962 | 99.42445 | 74.84423 | 87.186   |
| 1471.444 | 99.39449 | 74.84778 | 87.16934 |
| 1471.926 | 99.36642 | 74.85275 | 87.15644 |
| 1472.408 | 99.34231 | 74.85933 | 87.14776 |
| 1472.891 | 99.32294 | 74.86759 | 87.14335 |
| 1473.373 | 99.30763 | 74.8775  | 87.14273 |
| 1473.855 | 99.29458 | 74.8889  | 87.14495 |
| 1474.337 | 99.28204 | 74.90154 | 87.14859 |
| 1474.819 | 99.26891 | 74.91507 | 87.15188 |

|          |          |          |          |
|----------|----------|----------|----------|
| 1475.301 | 99.25497 | 74.92903 | 87.15283 |
| 1475.783 | 99.24026 | 74.94297 | 87.14948 |
| 1476.265 | 99.22463 | 74.95643 | 87.14009 |
| 1476.748 | 99.20728 | 74.96906 | 87.12332 |
| 1477.23  | 99.18672 | 74.98068 | 87.09827 |
| 1477.712 | 99.16122 | 74.99124 | 87.06455 |
| 1478.194 | 99.12917 | 75.00083 | 87.02229 |
| 1478.676 | 99.0895  | 75.00963 | 86.97223 |
| 1479.158 | 99.04157 | 75.01791 | 86.9157  |
| 1479.64  | 98.98517 | 75.02596 | 86.85456 |
| 1480.122 | 98.92006 | 75.03407 | 86.79091 |
| 1480.604 | 98.84593 | 75.04247 | 86.72682 |
| 1481.087 | 98.76231 | 75.05129 | 86.66411 |
| 1481.569 | 98.66864 | 75.06056 | 86.60412 |
| 1482.051 | 98.56453 | 75.07013 | 86.54765 |
| 1482.533 | 98.44971 | 75.07976 | 86.49491 |
| 1483.015 | 98.3239  | 75.08903 | 86.4456  |
| 1483.497 | 98.18672 | 75.09751 | 86.39909 |
| 1483.979 | 98.03765 | 75.10482 | 86.35468 |
| 1484.461 | 97.87625 | 75.1108  | 86.31198 |
| 1484.944 | 97.70281 | 75.11554 | 86.27117 |
| 1485.426 | 97.51918 | 75.11933 | 86.2329  |
| 1485.908 | 97.3297  | 75.12255 | 86.19807 |
| 1486.39  | 97.14161 | 75.12549 | 86.16757 |
| 1486.872 | 96.96518 | 75.12832 | 86.14207 |
| 1487.354 | 96.81275 | 75.13108 | 86.12211 |
| 1487.836 | 96.69769 | 75.13376 | 86.10821 |
| 1488.319 | 96.63261 | 75.1364  | 86.10103 |
| 1488.801 | 96.62759 | 75.13912 | 86.10135 |
| 1489.283 | 96.68749 | 75.1421  | 86.11007 |
| 1489.765 | 96.80943 | 75.14558 | 86.12808 |
| 1490.247 | 96.98172 | 75.14983 | 86.15609 |
| 1490.729 | 97.18613 | 75.15507 | 86.19454 |
| 1491.211 | 97.40298 | 75.1615  | 86.24363 |
| 1491.693 | 97.61613 | 75.16935 | 86.30331 |
| 1492.176 | 97.81604 | 75.17886 | 86.37338 |
| 1492.658 | 97.99918 | 75.1903  | 86.45351 |
| 1493.14  | 98.16624 | 75.20382 | 86.54299 |
| 1493.622 | 98.31984 | 75.21926 | 86.64039 |
| 1494.104 | 98.46281 | 75.23587 | 86.74308 |
| 1494.586 | 98.59717 | 75.25227 | 86.84716 |
| 1495.068 | 98.7236  | 75.26685 | 86.94835 |
| 1495.55  | 98.84147 | 75.27837 | 87.04315 |
| 1496.032 | 98.94917 | 75.28634 | 87.12957 |

|          |          |          |          |
|----------|----------|----------|----------|
| 1496.515 | 99.04515 | 75.29098 | 87.20689 |
| 1496.997 | 99.12876 | 75.2929  | 87.27514 |
| 1497.479 | 99.20077 | 75.2928  | 87.33449 |
| 1497.961 | 99.26308 | 75.29131 | 87.38503 |
| 1498.443 | 99.31811 | 75.28884 | 87.42669 |
| 1498.925 | 99.36803 | 75.28561 | 87.45922 |
| 1499.407 | 99.41434 | 75.28163 | 87.48239 |
| 1499.89  | 99.4575  | 75.27687 | 87.49609 |
| 1500.372 | 99.49711 | 75.27131 | 87.50054 |
| 1500.854 | 99.532   | 75.26505 | 87.49648 |
| 1501.336 | 99.56066 | 75.25834 | 87.4853  |
| 1501.818 | 99.58163 | 75.2516  | 87.46903 |
| 1502.3   | 99.59379 | 75.24529 | 87.4502  |
| 1502.782 | 99.59664 | 75.23987 | 87.43136 |
| 1503.264 | 99.59018 | 75.23564 | 87.4146  |
| 1503.747 | 99.57492 | 75.23268 | 87.4011  |
| 1504.229 | 99.55206 | 75.23087 | 87.39102 |
| 1504.711 | 99.5238  | 75.22998 | 87.38374 |
| 1505.193 | 99.49402 | 75.22978 | 87.37835 |
| 1505.675 | 99.46887 | 75.23009 | 87.37404 |
| 1506.157 | 99.45624 | 75.2308  | 87.37035 |
| 1506.639 | 99.46236 | 75.23186 | 87.36716 |
| 1507.121 | 99.48768 | 75.23324 | 87.36451 |
| 1507.604 | 99.52628 | 75.23492 | 87.36243 |
| 1508.086 | 99.56975 | 75.23685 | 87.36076 |
| 1508.568 | 99.61131 | 75.23897 | 87.35902 |
| 1509.05  | 99.64721 | 75.24111 | 87.35639 |
| 1509.532 | 99.67601 | 75.24312 | 87.35202 |
| 1510.014 | 99.69772 | 75.24485 | 87.34548 |
| 1510.496 | 99.71296 | 75.24627 | 87.33707 |
| 1510.979 | 99.72279 | 75.24749 | 87.3278  |
| 1511.46  | 99.72859 | 75.24872 | 87.31912 |
| 1511.943 | 99.73158 | 75.25026 | 87.31252 |
| 1512.425 | 99.73271 | 75.25239 | 87.30926 |
| 1512.907 | 99.73218 | 75.25538 | 87.31015 |
| 1513.389 | 99.72958 | 75.25939 | 87.31547 |
| 1513.871 | 99.72405 | 75.26452 | 87.32503 |
| 1514.353 | 99.7149  | 75.27076 | 87.33822 |
| 1514.835 | 99.70197 | 75.27802 | 87.35423 |
| 1515.318 | 99.68616 | 75.28616 | 87.37211 |
| 1515.8   | 99.66955 | 75.29494 | 87.39076 |
| 1516.282 | 99.65488 | 75.30396 | 87.40893 |
| 1516.764 | 99.64458 | 75.31264 | 87.42509 |
| 1517.246 | 99.63963 | 75.32018 | 87.43749 |

|          |          |          |          |
|----------|----------|----------|----------|
| 1517.728 | 99.63914 | 75.32564 | 87.44439 |
| 1518.21  | 99.64111 | 75.32827 | 87.44459 |
| 1518.692 | 99.64333 | 75.3279  | 87.43827 |
| 1519.175 | 99.64457 | 75.32517 | 87.42734 |
| 1519.657 | 99.64485 | 75.32138 | 87.41493 |
| 1520.139 | 99.64545 | 75.31787 | 87.404   |
| 1520.621 | 99.64822 | 75.31545 | 87.39621 |
| 1521.103 | 99.65434 | 75.3143  | 87.39171 |
| 1521.585 | 99.66326 | 75.31412 | 87.38964 |
| 1522.067 | 99.67249 | 75.31445 | 87.38907 |
| 1522.549 | 99.67886 | 75.31501 | 87.3896  |
| 1523.031 | 99.68025 | 75.31576 | 87.39156 |
| 1523.514 | 99.67629 | 75.31689 | 87.39585 |
| 1523.996 | 99.66831 | 75.31875 | 87.40361 |
| 1524.478 | 99.6587  | 75.32172 | 87.41593 |
| 1524.96  | 99.65045 | 75.32611 | 87.43369 |
| 1525.442 | 99.64637 | 75.3321  | 87.4573  |
| 1525.924 | 99.64835 | 75.3396  | 87.48658 |
| 1526.406 | 99.65657 | 75.34828 | 87.52056 |
| 1526.888 | 99.66963 | 75.3575  | 87.55726 |
| 1527.371 | 99.68502 | 75.3664  | 87.59376 |
| 1527.853 | 99.70004 | 75.37411 | 87.62669 |
| 1528.335 | 99.71241 | 75.37996 | 87.65304 |
| 1528.817 | 99.7206  | 75.38364 | 87.67113 |
| 1529.299 | 99.72385 | 75.3852  | 87.68086 |
| 1529.781 | 99.72205 | 75.38492 | 87.68331 |
| 1530.263 | 99.71559 | 75.38309 | 87.67999 |
| 1530.746 | 99.70546 | 75.37993 | 87.67215 |
| 1531.228 | 99.69312 | 75.3755  | 87.66037 |
| 1531.71  | 99.68079 | 75.36974 | 87.64452 |
| 1532.192 | 99.6712  | 75.36246 | 87.6239  |
| 1532.674 | 99.66715 | 75.35349 | 87.59779 |
| 1533.156 | 99.67051 | 75.34276 | 87.56599 |
| 1533.638 | 99.68094 | 75.33047 | 87.52936 |
| 1534.12  | 99.69559 | 75.31709 | 87.48978 |
| 1534.603 | 99.71049 | 75.30327 | 87.44972 |
| 1535.085 | 99.72237 | 75.28967 | 87.41144 |
| 1535.567 | 99.72946 | 75.27689 | 87.37659 |
| 1536.049 | 99.73135 | 75.26531 | 87.34598 |
| 1536.531 | 99.72844 | 75.25513 | 87.31964 |
| 1537.013 | 99.72118 | 75.24636 | 87.29701 |
| 1537.495 | 99.70991 | 75.23881 | 87.27722 |
| 1537.977 | 99.69473 | 75.23226 | 87.25946 |
| 1538.459 | 99.67586 | 75.22654 | 87.24332 |

|          |          |          |          |
|----------|----------|----------|----------|
| 1538.942 | 99.65427 | 75.22163 | 87.22901 |
| 1539.424 | 99.63239 | 75.21764 | 87.21726 |
| 1539.906 | 99.61397 | 75.2148  | 87.20912 |
| 1540.388 | 99.60246 | 75.21331 | 87.20562 |
| 1540.87  | 99.59937 | 75.21323 | 87.2075  |
| 1541.352 | 99.60345 | 75.21449 | 87.21502 |
| 1541.834 | 99.61176 | 75.21684 | 87.22786 |
| 1542.316 | 99.62116 | 75.21992 | 87.24524 |
| 1542.799 | 99.6295  | 75.22334 | 87.2661  |
| 1543.281 | 99.63625 | 75.22681 | 87.28934 |
| 1543.763 | 99.64231 | 75.23012 | 87.31409 |
| 1544.245 | 99.64957 | 75.2332  | 87.33983 |
| 1544.727 | 99.65982 | 75.23611 | 87.36656 |
| 1545.209 | 99.67386 | 75.23904 | 87.39476 |
| 1545.691 | 99.69078 | 75.24222 | 87.42499 |
| 1546.174 | 99.70827 | 75.24568 | 87.45691 |
| 1546.656 | 99.72337 | 75.24904 | 87.48833 |
| 1547.138 | 99.73354 | 75.25159 | 87.51566 |
| 1547.62  | 99.73735 | 75.25268 | 87.53585 |
| 1548.102 | 99.73465 | 75.25207 | 87.54792 |
| 1548.584 | 99.72678 | 75.24984 | 87.55263 |
| 1549.066 | 99.71626 | 75.24614 | 87.55139 |
| 1549.548 | 99.70615 | 75.24104 | 87.54528 |
| 1550.031 | 99.69887 | 75.23447 | 87.53471 |
| 1550.513 | 99.69558 | 75.22629 | 87.51941 |
| 1550.995 | 99.69582 | 75.2164  | 87.49875 |
| 1551.477 | 99.69825 | 75.20481 | 87.47228 |
| 1551.959 | 99.70146 | 75.19176 | 87.44026 |
| 1552.441 | 99.70448 | 75.17766 | 87.40388 |
| 1552.923 | 99.70702 | 75.163   | 87.36504 |
| 1553.405 | 99.70911 | 75.14818 | 87.32581 |
| 1553.887 | 99.71069 | 75.13353 | 87.28788 |
| 1554.37  | 99.71116 | 75.11924 | 87.25248 |
| 1554.852 | 99.70924 | 75.10549 | 87.22033 |
| 1555.334 | 99.70324 | 75.0924  | 87.19183 |
| 1555.816 | 99.69145 | 75.08005 | 87.16712 |
| 1556.298 | 99.67258 | 75.06846 | 87.14613 |
| 1556.78  | 99.64619 | 75.05754 | 87.12861 |
| 1557.262 | 99.61375 | 75.04722 | 87.11417 |
| 1557.744 | 99.58005 | 75.03742 | 87.10244 |
| 1558.227 | 99.55435 | 75.02822 | 87.09323 |
| 1558.709 | 99.548   | 75.01979 | 87.08659 |
| 1559.191 | 99.56656 | 75.01235 | 87.08278 |
| 1559.673 | 99.60394 | 75.00608 | 87.08209 |

|          |          |          |          |
|----------|----------|----------|----------|
| 1560.155 | 99.64718 | 75.00104 | 87.08475 |
| 1560.637 | 99.68575 | 74.99714 | 87.09085 |
| 1561.119 | 99.71489 | 74.99426 | 87.10051 |
| 1561.602 | 99.73405 | 74.99233 | 87.11396 |
| 1562.083 | 99.74451 | 74.99137 | 87.13161 |
| 1562.566 | 99.74814 | 74.99153 | 87.15386 |
| 1563.048 | 99.74712 | 74.9929  | 87.18075 |
| 1563.53  | 99.74383 | 74.99538 | 87.21164 |
| 1564.012 | 99.74073 | 74.99857 | 87.24513 |
| 1564.494 | 99.7401  | 75.00179 | 87.27942 |
| 1564.976 | 99.74327 | 75.00432 | 87.31282 |
| 1565.458 | 99.75031 | 75.00567 | 87.34421 |
| 1565.941 | 99.76009 | 75.00566 | 87.37322 |
| 1566.423 | 99.77082 | 75.00443 | 87.40011 |
| 1566.905 | 99.7807  | 75.00232 | 87.42551 |
| 1567.387 | 99.78854 | 74.99968 | 87.45007 |
| 1567.869 | 99.79388 | 74.99674 | 87.47407 |
| 1568.351 | 99.79714 | 74.99345 | 87.49712 |
| 1568.833 | 99.79941 | 74.98949 | 87.51801 |
| 1569.315 | 99.80196 | 74.98432 | 87.53471 |
| 1569.798 | 99.80579 | 74.97729 | 87.54463 |
| 1570.28  | 99.81102 | 74.96787 | 87.54536 |
| 1570.762 | 99.81712 | 74.95595 | 87.53592 |
| 1571.244 | 99.82337 | 74.94206 | 87.51799 |
| 1571.726 | 99.82917 | 74.92725 | 87.49573 |
| 1572.208 | 99.83438 | 74.91267 | 87.47383 |
| 1572.69  | 99.83909 | 74.89906 | 87.45547 |
| 1573.172 | 99.84364 | 74.88674 | 87.44185 |
| 1573.655 | 99.84836 | 74.87575 | 87.43289 |
| 1574.137 | 99.85362 | 74.86606 | 87.4279  |
| 1574.619 | 99.85991 | 74.8576  | 87.42606 |
| 1575.101 | 99.86781 | 74.85025 | 87.4266  |
| 1575.583 | 99.87808 | 74.84383 | 87.4289  |
| 1576.065 | 99.89121 | 74.8381  | 87.43255 |
| 1576.547 | 99.90722 | 74.8328  | 87.43739 |
| 1577.03  | 99.9253  | 74.82774 | 87.44346 |
| 1577.511 | 99.94426 | 74.82282 | 87.45094 |
| 1577.994 | 99.96286 | 74.81806 | 87.45995 |
| 1578.476 | 99.9802  | 74.81352 | 87.47044 |
| 1578.958 | 99.9958  | 74.80919 | 87.48201 |
| 1579.44  | 100.0096 | 74.80495 | 87.49394 |
| 1579.922 | 100.0217 | 74.80055 | 87.50528 |
| 1580.404 | 100.0327 | 74.79567 | 87.51505 |
| 1580.886 | 100.0431 | 74.79004 | 87.5225  |

|          |          |          |          |
|----------|----------|----------|----------|
| 1581.369 | 100.0532 | 74.7836  | 87.5274  |
| 1581.851 | 100.0631 | 74.77653 | 87.53018 |
| 1582.333 | 100.0722 | 74.76924 | 87.53181 |
| 1582.815 | 100.0795 | 74.76215 | 87.5334  |
| 1583.297 | 100.0838 | 74.7556  | 87.53588 |
| 1583.779 | 100.084  | 74.74971 | 87.5397  |
| 1584.261 | 100.0795 | 74.74446 | 87.54485 |
| 1584.743 | 100.0707 | 74.7397  | 87.55096 |
| 1585.226 | 100.0588 | 74.73528 | 87.55745 |
| 1585.708 | 100.0458 | 74.73105 | 87.56357 |
| 1586.19  | 100.0341 | 74.72681 | 87.56841 |
| 1586.672 | 100.0256 | 74.72229 | 87.57103 |
| 1587.154 | 100.0219 | 74.71712 | 87.5705  |
| 1587.636 | 100.0233 | 74.71092 | 87.56619 |
| 1588.118 | 100.0298 | 74.70342 | 87.55803 |
| 1588.6   | 100.0404 | 74.6946  | 87.54664 |
| 1589.083 | 100.0537 | 74.68479 | 87.53324 |
| 1589.565 | 100.0683 | 74.67455 | 87.5192  |
| 1590.047 | 100.083  | 74.66443 | 87.50568 |
| 1590.529 | 100.0973 | 74.65488 | 87.4934  |
| 1591.011 | 100.1106 | 74.64613 | 87.48267 |
| 1591.493 | 100.1229 | 74.63825 | 87.47347 |
| 1591.975 | 100.1339 | 74.63118 | 87.46559 |
| 1592.458 | 100.1436 | 74.62482 | 87.45876 |
| 1592.939 | 100.1516 | 74.61914 | 87.45269 |
| 1593.422 | 100.1578 | 74.61419 | 87.4472  |
| 1593.904 | 100.1621 | 74.61007 | 87.44216 |
| 1594.386 | 100.1647 | 74.60687 | 87.43747 |
| 1594.868 | 100.1661 | 74.60464 | 87.43302 |
| 1595.35  | 100.1668 | 74.60331 | 87.42864 |
| 1595.832 | 100.1673 | 74.60279 | 87.42413 |
| 1596.314 | 100.1681 | 74.60301 | 87.41933 |
| 1596.797 | 100.1695 | 74.60399 | 87.41414 |
| 1597.279 | 100.172  | 74.60583 | 87.40862 |
| 1597.761 | 100.1755 | 74.60871 | 87.40294 |
| 1598.243 | 100.1802 | 74.61275 | 87.39733 |
| 1598.725 | 100.1861 | 74.61797 | 87.39208 |
| 1599.207 | 100.1927 | 74.62432 | 87.38743 |
| 1599.689 | 100.1996 | 74.6317  | 87.38364 |
| 1600.171 | 100.2063 | 74.64007 | 87.38092 |
| 1600.654 | 100.2124 | 74.64949 | 87.37955 |
| 1601.136 | 100.2176 | 74.66013 | 87.37979 |
| 1601.618 | 100.2224 | 74.6722  | 87.38188 |
| 1602.1   | 100.2275 | 74.68583 | 87.38596 |



|          |          |          |          |
|----------|----------|----------|----------|
| 1602.582 | 100.2336 | 74.70094 | 87.39199 |
| 1603.064 | 100.2414 | 74.71724 | 87.39962 |
| 1603.546 | 100.2508 | 74.7342  | 87.40809 |
| 1604.028 | 100.2613 | 74.75124 | 87.41624 |
| 1604.51  | 100.2718 | 74.76789 | 87.42271 |
| 1604.993 | 100.2814 | 74.78404 | 87.42628 |
| 1605.475 | 100.2894 | 74.79991 | 87.42627 |
| 1605.957 | 100.2958 | 74.81593 | 87.42271 |
| 1606.439 | 100.301  | 74.8326  | 87.41618 |
| 1606.921 | 100.3057 | 74.85031 | 87.40765 |
| 1607.403 | 100.3106 | 74.86935 | 87.39826 |
| 1607.885 | 100.3158 | 74.88996 | 87.38914 |
| 1608.367 | 100.3213 | 74.91234 | 87.38135 |
| 1608.85  | 100.3267 | 74.9367  | 87.3757  |
| 1609.332 | 100.3317 | 74.96316 | 87.37269 |
| 1609.814 | 100.3363 | 74.99168 | 87.37234 |
| 1610.296 | 100.3411 | 75.022   | 87.37418 |
| 1610.778 | 100.3465 | 75.05365 | 87.37732 |
| 1611.26  | 100.3527 | 75.08611 | 87.38073 |
| 1611.742 | 100.3589 | 75.11896 | 87.38361 |
| 1612.225 | 100.364  | 75.15204 | 87.38558 |
| 1612.707 | 100.3661 | 75.18548 | 87.38682 |
| 1613.189 | 100.3638 | 75.21958 | 87.38784 |
| 1613.671 | 100.356  | 75.25462 | 87.38933 |
| 1614.153 | 100.3427 | 75.29079 | 87.39182 |
| 1614.635 | 100.3255 | 75.32808 | 87.39562 |
| 1615.117 | 100.3074 | 75.36635 | 87.40076 |
| 1615.599 | 100.2928 | 75.40544 | 87.40706 |
| 1616.082 | 100.2867 | 75.44529 | 87.41428 |
| 1616.564 | 100.2923 | 75.48595 | 87.42231 |
| 1617.046 | 100.3094 | 75.52756 | 87.43121 |
| 1617.528 | 100.3342 | 75.57027 | 87.44123 |
| 1618.01  | 100.3614 | 75.61418 | 87.45274 |
| 1618.492 | 100.3864 | 75.65926 | 87.46613 |
| 1618.974 | 100.4063 | 75.7055  | 87.48179 |
| 1619.456 | 100.4196 | 75.75287 | 87.50013 |
| 1619.938 | 100.4259 | 75.80149 | 87.52157 |
| 1620.421 | 100.425  | 75.85149 | 87.54655 |
| 1620.903 | 100.4173 | 75.90304 | 87.57551 |
| 1621.385 | 100.4035 | 75.95619 | 87.60876 |
| 1621.867 | 100.3853 | 76.01079 | 87.64633 |
| 1622.349 | 100.3654 | 76.06644 | 87.68775 |
| 1622.831 | 100.3473 | 76.12256 | 87.73184 |
| 1623.313 | 100.3343 | 76.17846 | 87.77676 |

|          |          |          |          |
|----------|----------|----------|----------|
| 1623.796 | 100.3281 | 76.23357 | 87.82035 |
| 1624.278 | 100.3286 | 76.28748 | 87.86084 |
| 1624.76  | 100.3337 | 76.33998 | 87.89729 |
| 1625.242 | 100.3404 | 76.39082 | 87.92958 |
| 1625.724 | 100.3461 | 76.43972 | 87.95804 |
| 1626.206 | 100.3483 | 76.48628 | 87.98307 |
| 1626.688 | 100.346  | 76.53015 | 88.00491 |
| 1627.17  | 100.339  | 76.57116 | 88.02362 |
| 1627.653 | 100.3283 | 76.60944 | 88.03922 |
| 1628.135 | 100.3155 | 76.64551 | 88.05197 |
| 1628.617 | 100.303  | 76.68014 | 88.06258 |
| 1629.099 | 100.2925 | 76.7141  | 88.07229 |
| 1629.581 | 100.2848 | 76.7479  | 88.08263 |
| 1630.063 | 100.2798 | 76.78163 | 88.09506 |
| 1630.545 | 100.2762 | 76.81507 | 88.11071 |
| 1631.027 | 100.2721 | 76.84785 | 88.13022 |
| 1631.51  | 100.2654 | 76.87966 | 88.15388 |
| 1631.992 | 100.2538 | 76.9103  | 88.18161 |
| 1632.474 | 100.2358 | 76.93962 | 88.21299 |
| 1632.956 | 100.2105 | 76.96742 | 88.24719 |
| 1633.438 | 100.1781 | 76.99328 | 88.28288 |
| 1633.92  | 100.1407 | 77.01649 | 88.31821 |
| 1634.402 | 100.1027 | 77.03616 | 88.35101 |
| 1634.885 | 100.0702 | 77.05146 | 88.37922 |
| 1635.366 | 100.0493 | 77.06198 | 88.40157 |
| 1635.849 | 100.0433 | 77.06779 | 88.41789 |
| 1636.331 | 100.0501 | 77.06934 | 88.42909 |
| 1636.813 | 100.0639 | 77.06714 | 88.43664 |
| 1637.295 | 100.0783 | 77.06157 | 88.44215 |
| 1637.777 | 100.0896 | 77.05284 | 88.44706 |
| 1638.259 | 100.0967 | 77.04109 | 88.45264 |
| 1638.741 | 100.1005 | 77.02653 | 88.46004 |
| 1639.224 | 100.1029 | 77.00965 | 88.47039 |
| 1639.706 | 100.106  | 76.99122 | 88.48453 |
| 1640.188 | 100.1109 | 76.97206 | 88.50236 |
| 1640.67  | 100.1179 | 76.95256 | 88.52204 |
| 1641.152 | 100.126  | 76.9321  | 88.53994 |
| 1641.634 | 100.1332 | 76.90919 | 88.55229 |
| 1642.116 | 100.1375 | 76.88223 | 88.5571  |
| 1642.598 | 100.1366 | 76.85034 | 88.55456 |
| 1643.081 | 100.1293 | 76.81341 | 88.54623 |
| 1643.563 | 100.1144 | 76.77192 | 88.53408 |
| 1644.045 | 100.0919 | 76.72654 | 88.51987 |
| 1644.527 | 100.0625 | 76.67786 | 88.50481 |

|          |          |          |          |
|----------|----------|----------|----------|
| 1645.009 | 100.0278 | 76.62619 | 88.4895  |
| 1645.491 | 99.99094 | 76.57156 | 88.47389 |
| 1645.973 | 99.95598 | 76.51375 | 88.4574  |
| 1646.455 | 99.92742 | 76.45249 | 88.43917 |
| 1646.938 | 99.90853 | 76.38767 | 88.41853 |
| 1647.42  | 99.89985 | 76.31952 | 88.39543 |
| 1647.902 | 99.89899 | 76.24859 | 88.37084 |
| 1648.384 | 99.90207 | 76.17557 | 88.34661 |
| 1648.866 | 99.9052  | 76.10109 | 88.32479 |
| 1649.348 | 99.90536 | 76.02551 | 88.3069  |
| 1649.83  | 99.90018 | 75.94893 | 88.29355 |
| 1650.313 | 99.88743 | 75.87128 | 88.28449 |
| 1650.794 | 99.86462 | 75.79247 | 88.27902 |
| 1651.277 | 99.82898 | 75.71248 | 88.27639 |
| 1651.759 | 99.77894 | 75.63135 | 88.27611 |
| 1652.241 | 99.71751 | 75.54916 | 88.27812 |
| 1652.723 | 99.65592 | 75.46587 | 88.2827  |
| 1653.205 | 99.61124 | 75.38138 | 88.29034 |
| 1653.687 | 99.59511 | 75.29556 | 88.30157 |
| 1654.169 | 99.60558 | 75.2084  | 88.31685 |
| 1654.652 | 99.63199 | 75.12008 | 88.33643 |
| 1655.134 | 99.66389 | 75.03098 | 88.3602  |
| 1655.616 | 99.69462 | 74.94152 | 88.38763 |
| 1656.098 | 99.72105 | 74.85201 | 88.41756 |
| 1656.58  | 99.74208 | 74.76239 | 88.44816 |
| 1657.062 | 99.75773 | 74.6721  | 88.477   |
| 1657.544 | 99.76851 | 74.58019 | 88.50141 |
| 1658.026 | 99.77523 | 74.48559 | 88.51908 |
| 1658.509 | 99.77877 | 74.38759 | 88.52874 |
| 1658.991 | 99.77996 | 74.28608 | 88.53063 |
| 1659.473 | 99.77951 | 74.18161 | 88.52643 |
| 1659.955 | 99.77822 | 74.07501 | 88.51869 |
| 1660.437 | 99.77693 | 73.96715 | 88.51004 |
| 1660.919 | 99.77672 | 73.85869 | 88.50252 |
| 1661.401 | 99.77879 | 73.75009 | 88.49726 |
| 1661.883 | 99.78416 | 73.64164 | 88.49436 |
| 1662.365 | 99.79295 | 73.53346 | 88.49283 |
| 1662.848 | 99.804   | 73.42547 | 88.49055 |
| 1663.33  | 99.81492 | 73.31727 | 88.48451 |
| 1663.812 | 99.82294 | 73.20809 | 88.47117 |
| 1664.294 | 99.82581 | 73.09672 | 88.44725 |
| 1664.776 | 99.82239 | 72.98178 | 88.41068 |
| 1665.258 | 99.81261 | 72.86219 | 88.36195 |
| 1665.74  | 99.79702 | 72.73792 | 88.3045  |

|          |          |          |          |
|----------|----------|----------|----------|
| 1666.222 | 99.77669 | 72.61019 | 88.24346 |
| 1666.705 | 99.75277 | 72.48085 | 88.18333 |
| 1667.187 | 99.72666 | 72.35159 | 88.12683 |
| 1667.669 | 99.70007 | 72.22344 | 88.07506 |
| 1668.151 | 99.67516 | 72.09681 | 88.02811 |
| 1668.633 | 99.65447 | 71.97157 | 87.98561 |
| 1669.115 | 99.6405  | 71.8474  | 87.94714 |
| 1669.597 | 99.63495 | 71.72399 | 87.9124  |
| 1670.08  | 99.63791 | 71.60129 | 87.88119 |
| 1670.562 | 99.64777 | 71.47955 | 87.85326 |
| 1671.044 | 99.6616  | 71.35918 | 87.82781 |
| 1671.526 | 99.67638 | 71.24038 | 87.80311 |
| 1672.008 | 99.6896  | 71.12272 | 87.77633 |
| 1672.49  | 99.69976 | 71.00509 | 87.74436 |
| 1672.972 | 99.7062  | 70.88607 | 87.7049  |
| 1673.454 | 99.70901 | 70.76454 | 87.65724 |
| 1673.937 | 99.7087  | 70.64002 | 87.60211 |
| 1674.419 | 99.70612 | 70.51277 | 87.54119 |
| 1674.901 | 99.70217 | 70.38352 | 87.47663 |
| 1675.383 | 99.69767 | 70.25325 | 87.41064 |
| 1675.865 | 99.6933  | 70.1229  | 87.34512 |
| 1676.347 | 99.68948 | 69.99318 | 87.28144 |
| 1676.829 | 99.68671 | 69.86453 | 87.22028 |
| 1677.311 | 99.68551 | 69.73716 | 87.16176 |
| 1677.793 | 99.68639 | 69.6112  | 87.10561 |
| 1678.276 | 99.68965 | 69.48677 | 87.05141 |
| 1678.758 | 99.69475 | 69.36399 | 86.99868 |
| 1679.24  | 99.70013 | 69.24285 | 86.94694 |
| 1679.722 | 99.70318 | 69.12314 | 86.89572 |
| 1680.204 | 99.70065 | 69.0044  | 86.84461 |
| 1680.686 | 99.68928 | 68.88604 | 86.79341 |
| 1681.168 | 99.66685 | 68.76754 | 86.74229 |
| 1681.65  | 99.63236 | 68.64875 | 86.69194 |
| 1682.133 | 99.58691 | 68.53002 | 86.64348 |
| 1682.615 | 99.53463 | 68.41213 | 86.59798 |
| 1683.097 | 99.48402 | 68.29593 | 86.55601 |
| 1683.579 | 99.44776 | 68.18188 | 86.51721 |
| 1684.061 | 99.43795 | 68.06986 | 86.48044 |
| 1684.543 | 99.45816 | 67.95926 | 86.44438 |
| 1685.025 | 99.50032 | 67.84937 | 86.40795 |
| 1685.508 | 99.55067 | 67.73966 | 86.37057 |
| 1685.99  | 99.59781 | 67.62994 | 86.33207 |
| 1686.472 | 99.63575 | 67.52034 | 86.29261 |
| 1686.954 | 99.66304 | 67.4112  | 86.25251 |

|          |          |          |          |
|----------|----------|----------|----------|
| 1687.436 | 99.68073 | 67.30284 | 86.21192 |
| 1687.918 | 99.69086 | 67.19531 | 86.17054 |
| 1688.4   | 99.69582 | 67.08821 | 86.12752 |
| 1688.882 | 99.69774 | 66.98103 | 86.08204 |
| 1689.365 | 99.6982  | 66.87345 | 86.03391 |
| 1689.847 | 99.6982  | 66.76563 | 85.98376 |
| 1690.329 | 99.69793 | 66.65806 | 85.93263 |
| 1690.811 | 99.69724 | 66.55129 | 85.88159 |
| 1691.293 | 99.69585 | 66.44571 | 85.83147 |
| 1691.775 | 99.69371 | 66.34151 | 85.78275 |
| 1692.257 | 99.69097 | 66.23863 | 85.73547 |

EQE data of the PSCs based on SnO<sub>2</sub> and SSO ETL
